# Supplementary material for: Genetically Adjusted PSA Levels for Prostate Cancer Screening
Source: bioRxiv or medRxiv preprint supplement (doi:10.1101/2022.04.18.22273850), 2023-05-19

**Supplementary Figure 1:** Distribution of PSA values and measurements in the European ancestry men from the UK Biobank cohort that were included in the GWAS.

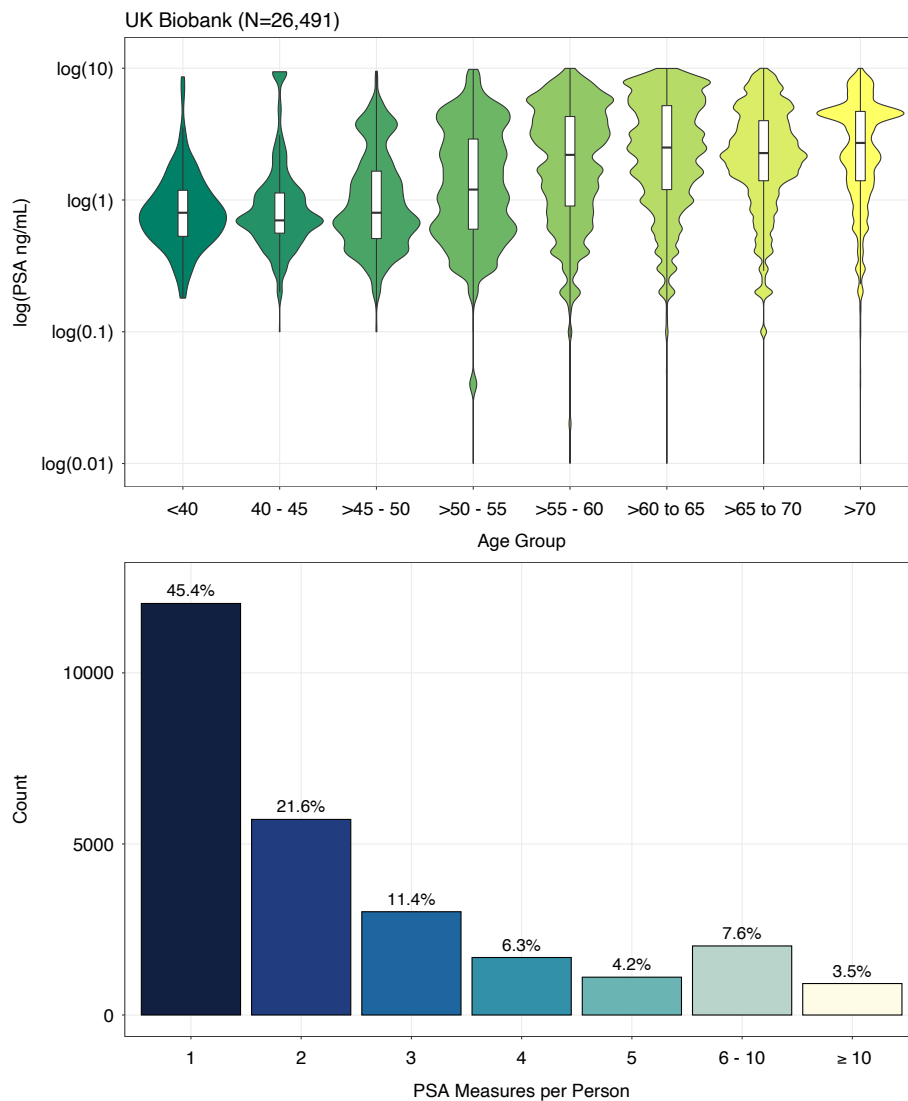

**Supplementary Figure 2:** Ancestry-specific effect sizes and corresponding correlations for 128 variants associated with PSA levels in men without prostate cancer ( $P < 5 \times 10^{-8}$ ) identified in the multi-ancestry meta-analysis. Correlations between effect sizes ( $\beta$ ) were estimated using Spearman's rho ( $\rho$ ).

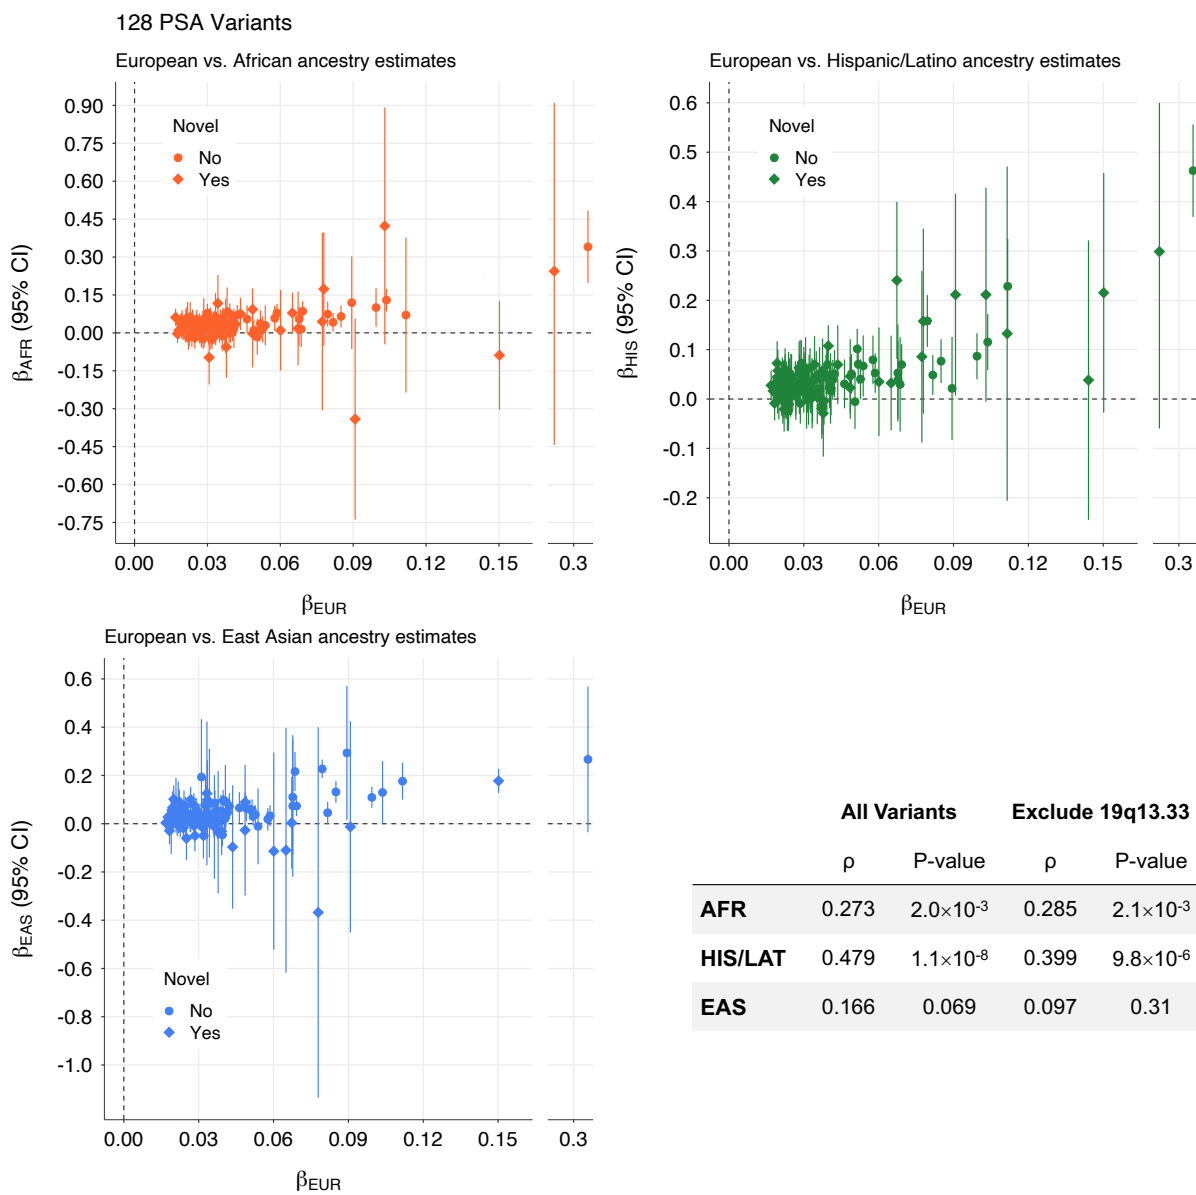

**Supplementary Figure 3:** Admixture plots visualizing global ancestry proportions for participants in validation cohorts A) Prostate Cancer Prevention Trial (PCPT) and B) Selenium and Vitamin E Cancer Prevention Trial (SELECT), both of which were excluded from the discovery GWAS of PSA levels

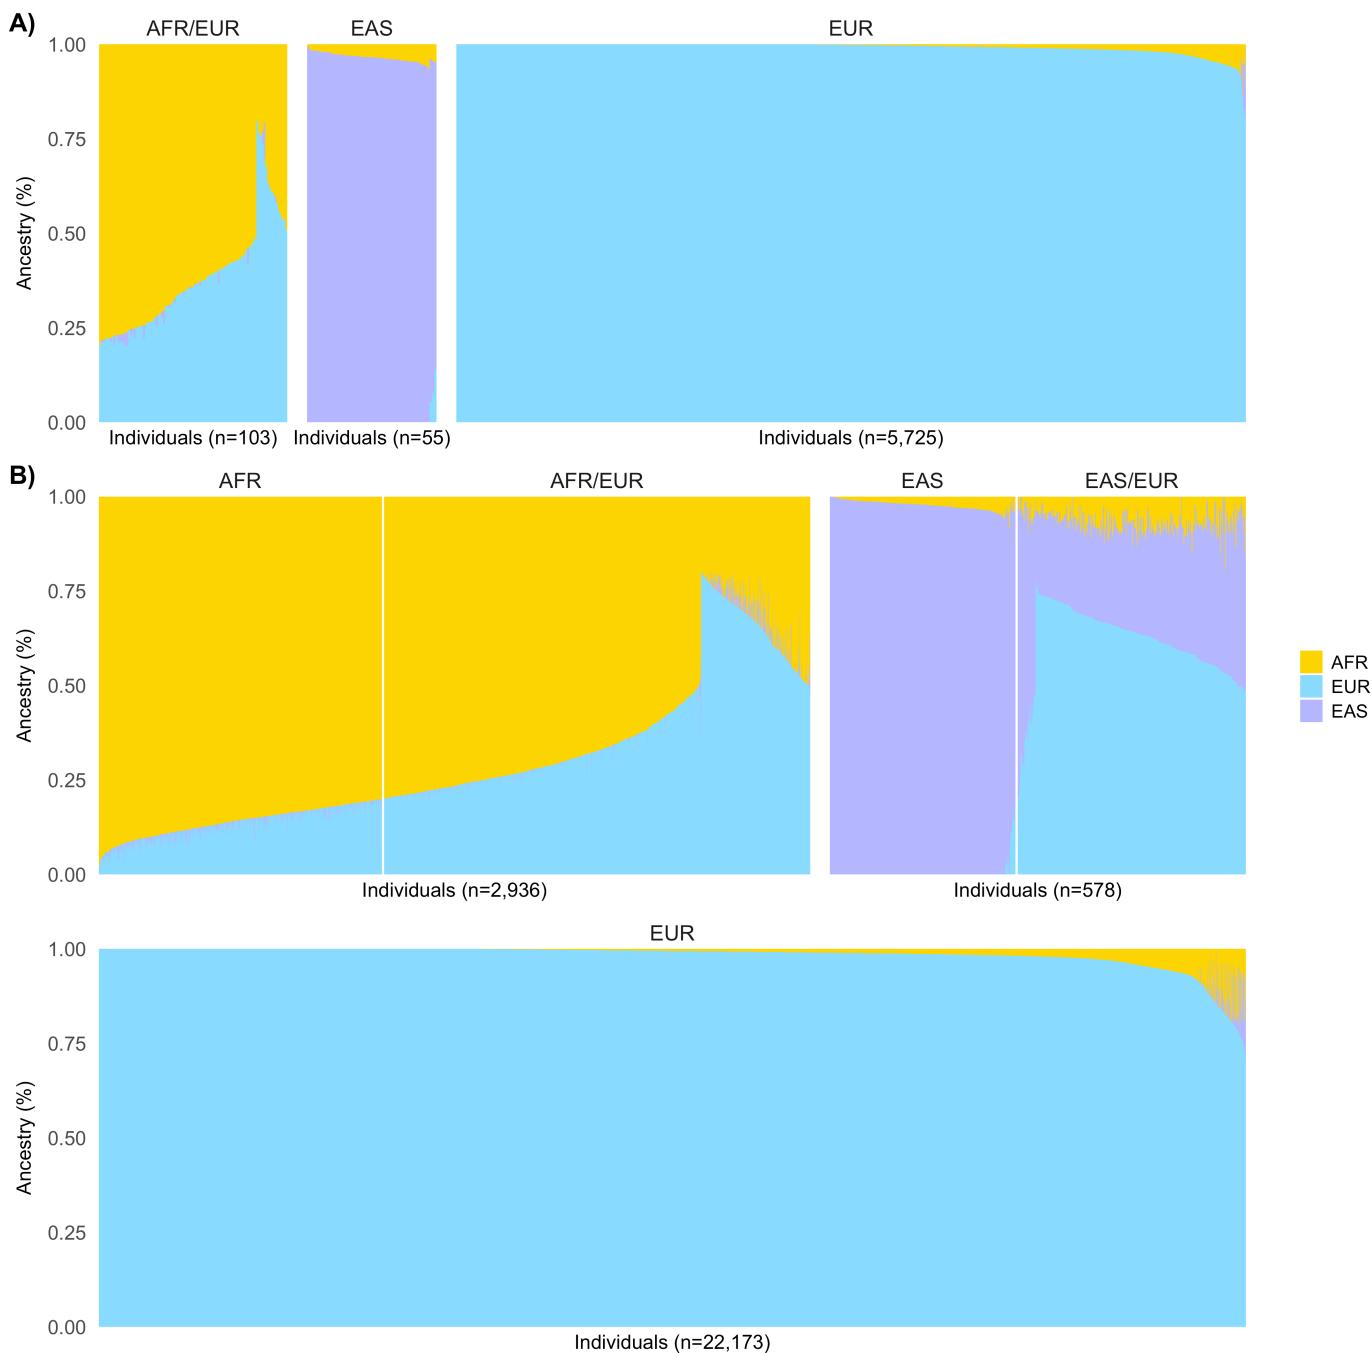

**Supplementary Figure 4:** Performance of PGS<sub>PSA</sub> was evaluated in the Prostate Cancer Prevention Trial (PCPT) and Selenium and Vitamin E Cancer Prevention Trial (SELECT). Panels A) and B) show effect estimates per standard deviation increase in the standardized PGS<sub>PSA</sub> on baseline log(PSA) in each trial, overall and stratified by age group.

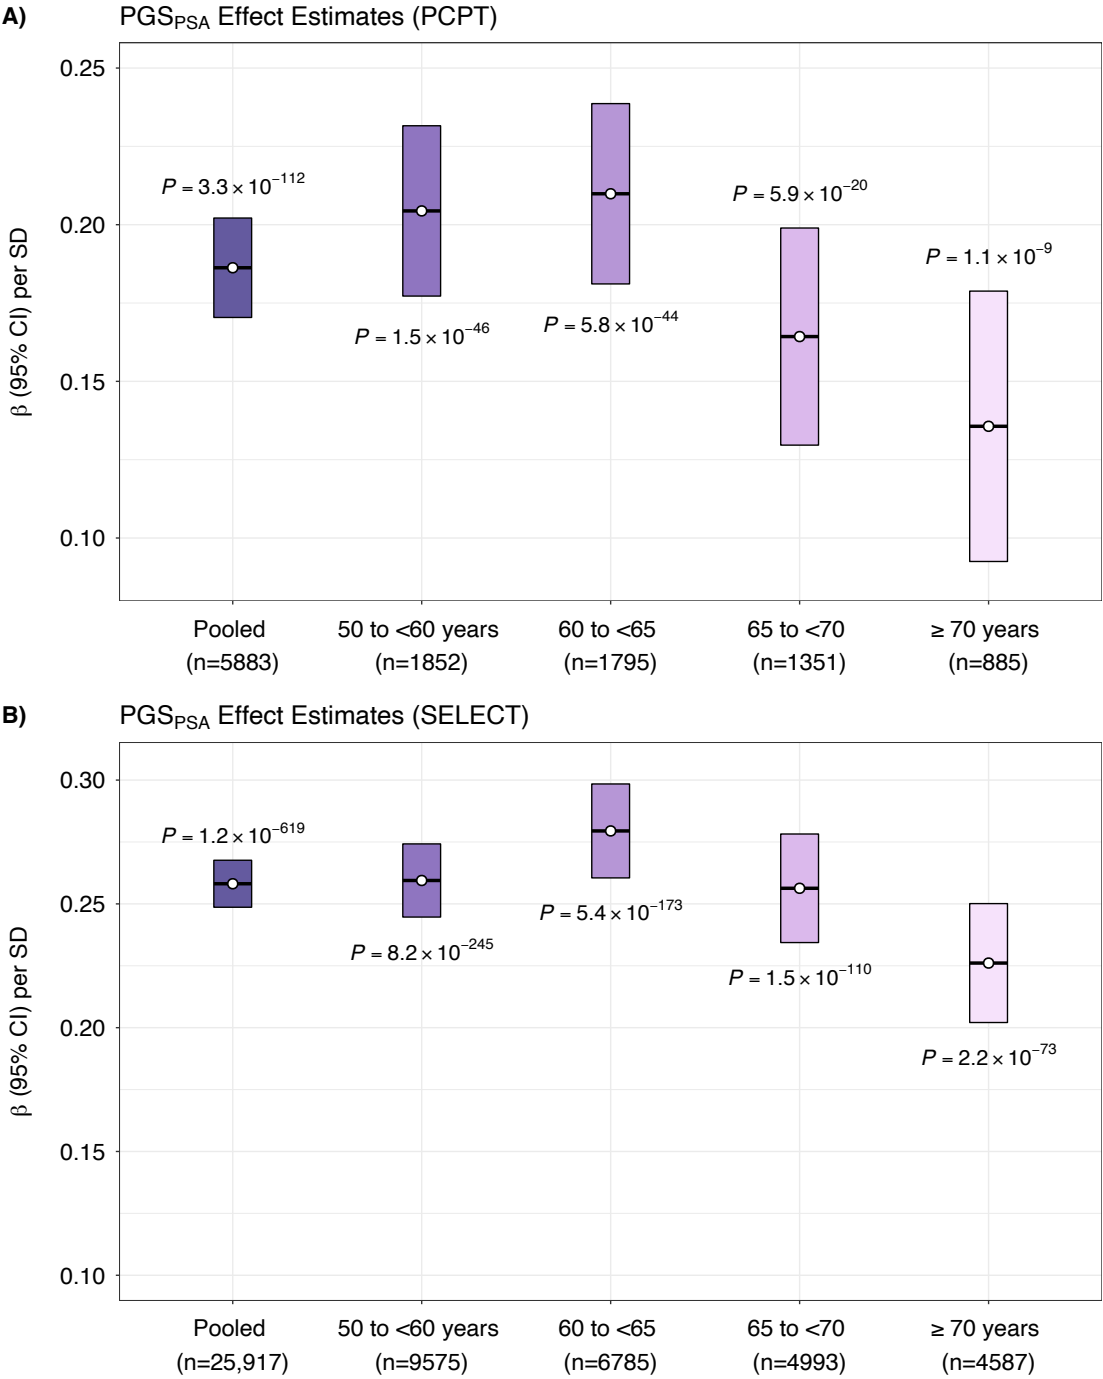

**Supplementary Figure 5:** Associations with baseline PSA and genetically adjusted baseline PSA in PCPT with the standard prostate cancer polygenic score (PGS<sub>269</sub>) and using weights that have been adjusted for index event bias (PGS<sub>269</sub><sup>adj</sup>). Each panel visualizes the regression line of the PGS association, overlaid on individual data points summarized as hexbins.

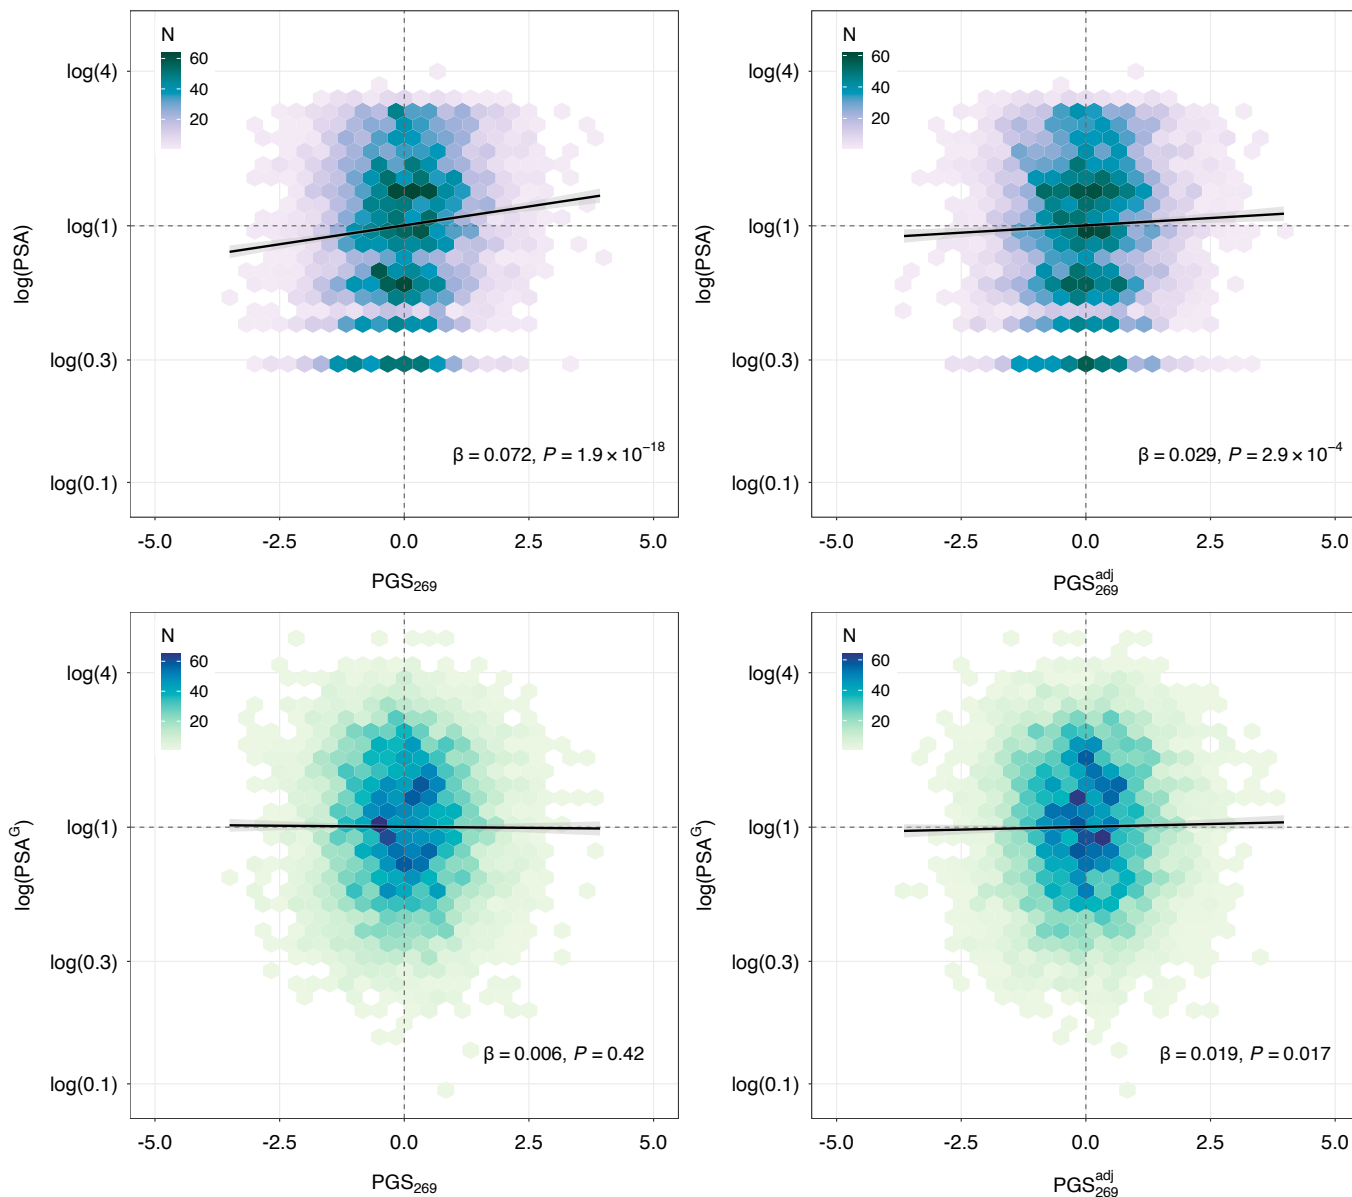

**Supplementary Figure 6:** Calibration plots for analyses of incident prostate cancer and aggressive prostate cancer in the pooled PCPT population (overall: 335 cases and 5548 controls; aggressive: 75 cases and 5548 controls) and in men of predominantly European ancestry (EUR $\geq$ 0.80; overall: 323 cases and 5402 controls; aggressive: 71 cases and 5402 controls).

PCPT: Prostate Cancer (Pooled)

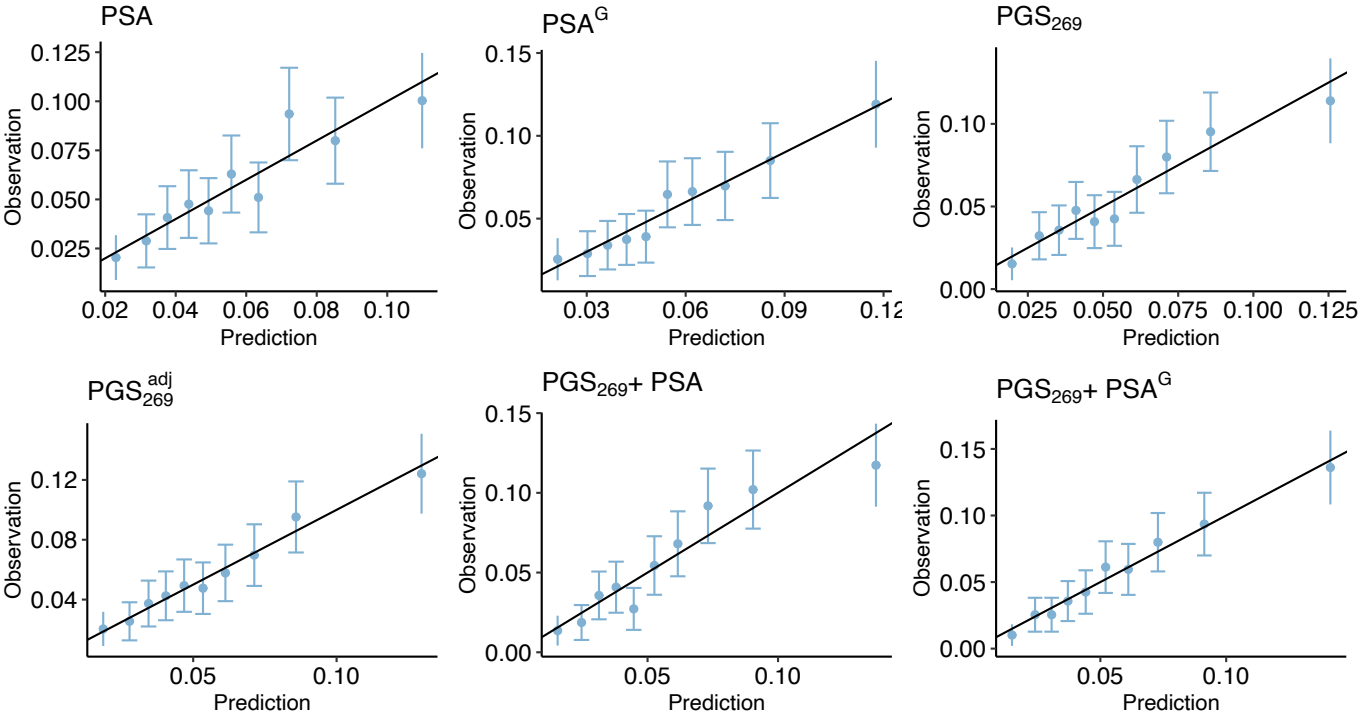

PCPT: Aggressive Prostate Cancer (Pooled)

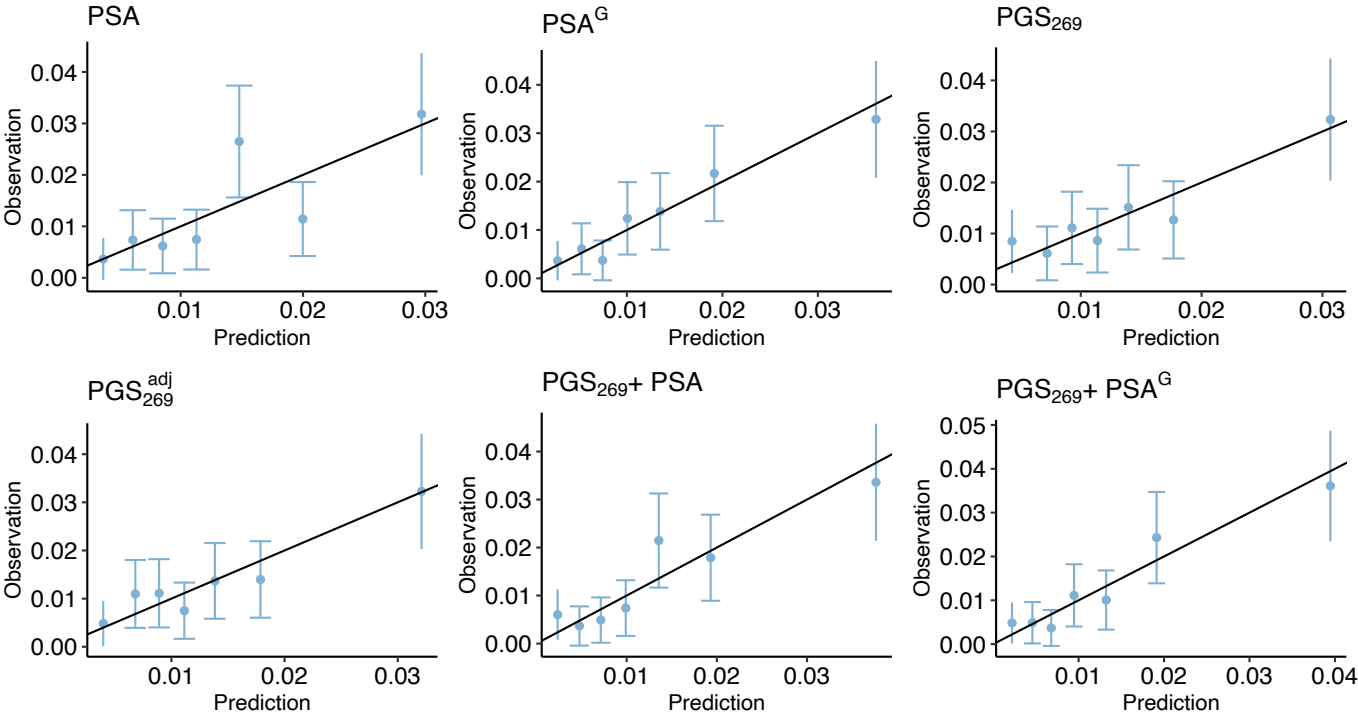

PCPT: Prostate Cancer (EUR)

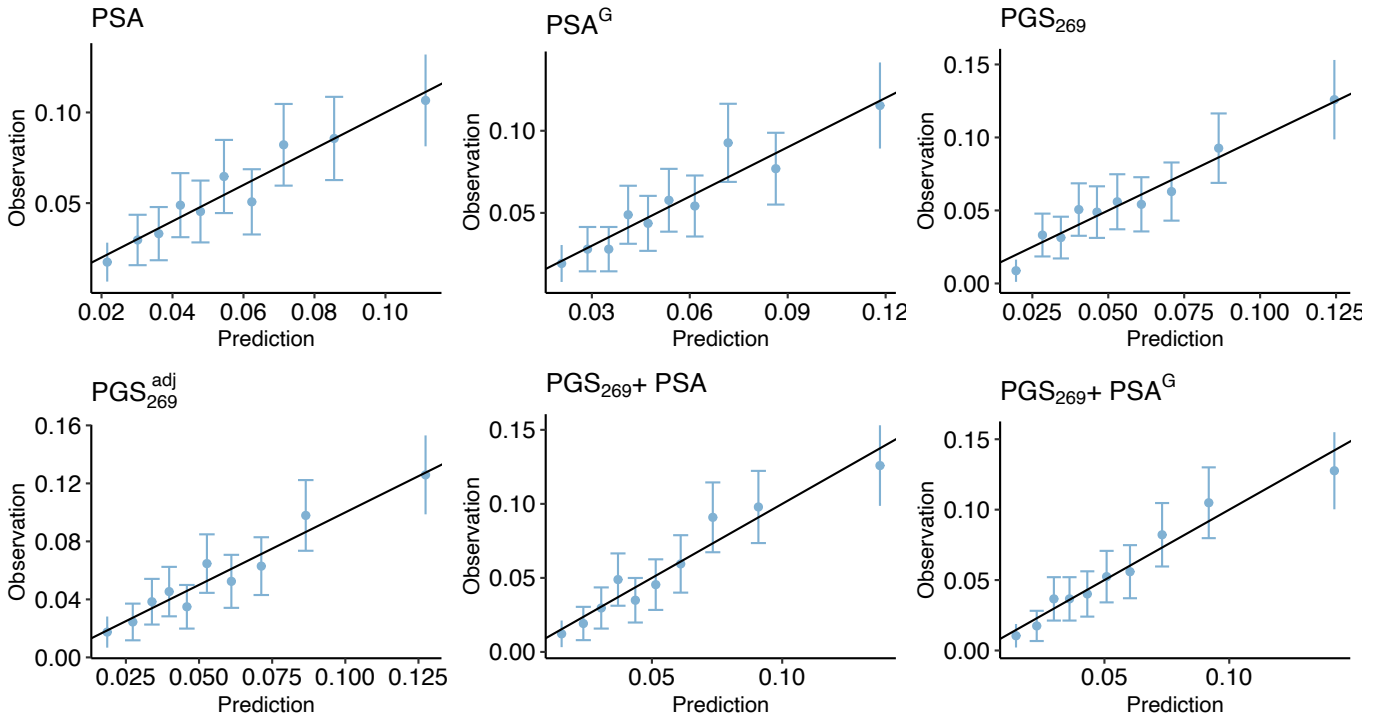

PCPT: Aggressive Prostate Cancer (EUR)

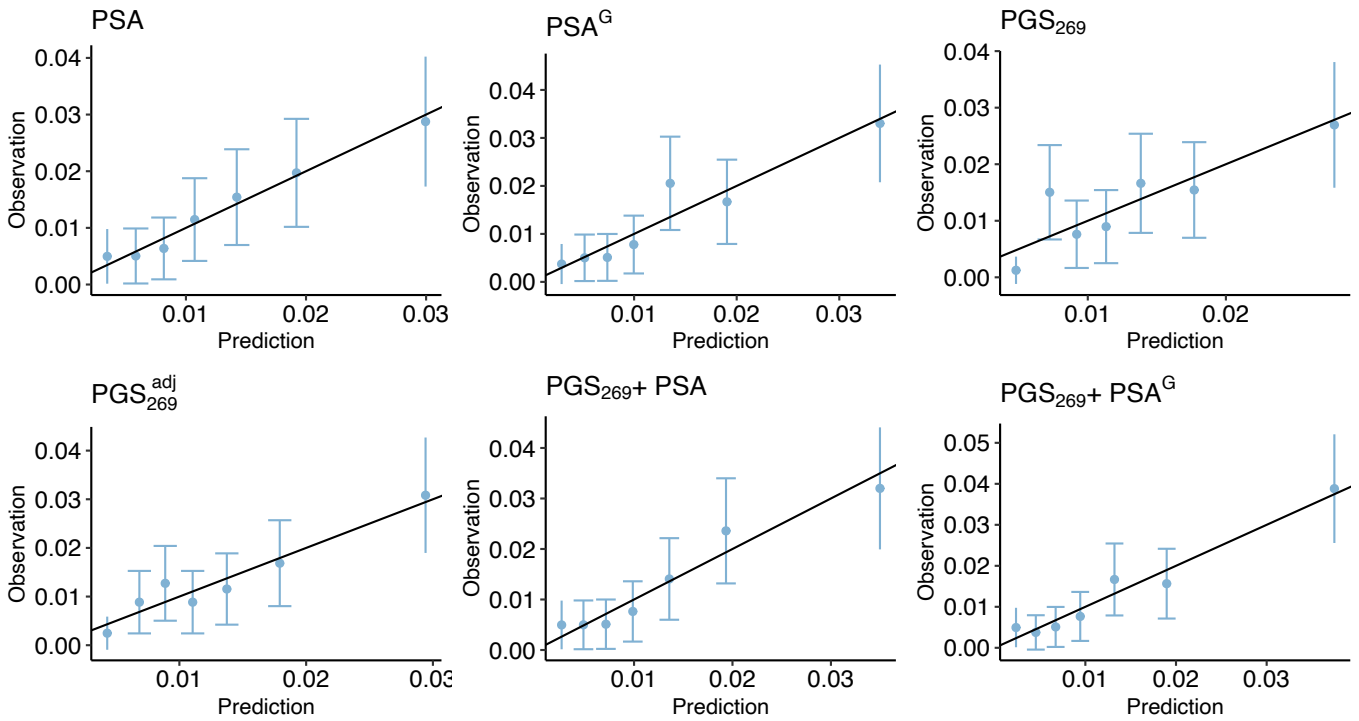

**Supplementary Figure 7:** Calibration plots for analyses of incident prostate cancer in the pooled SELECT population (572 cases and 23,667 controls) and stratified by ancestry. Predominantly European ancestry (EUR $\geq$ 0.80) subgroup includes 467 cases and 20,173 controls. Pooled African ancestry subgroup includes men of predominantly African ancestry (AFR $\geq$ 0.80) and intermediate African and European ancestry (0.20<AFR/EUR<0.80), for a total of 88 cases and 2733 controls.

SELECT: Prostate Cancer (Pooled)

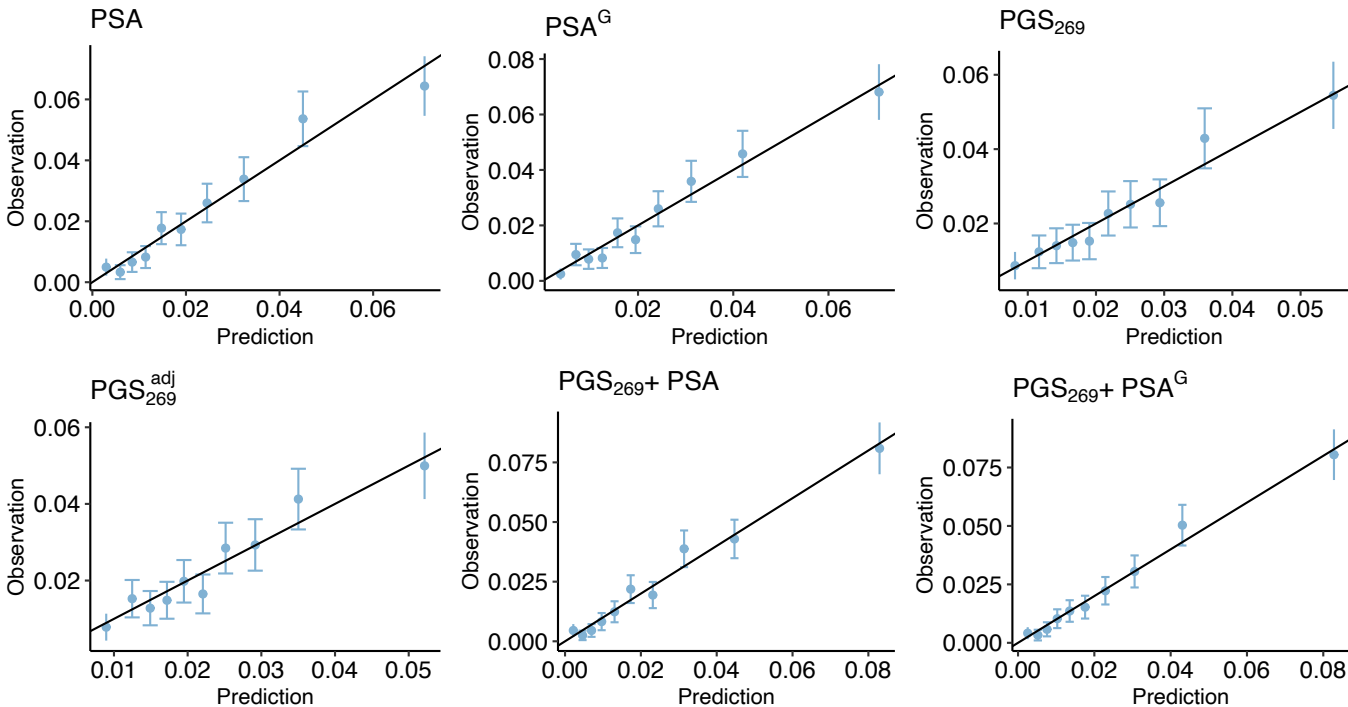

SELECT: Prostate Cancer (EUR)

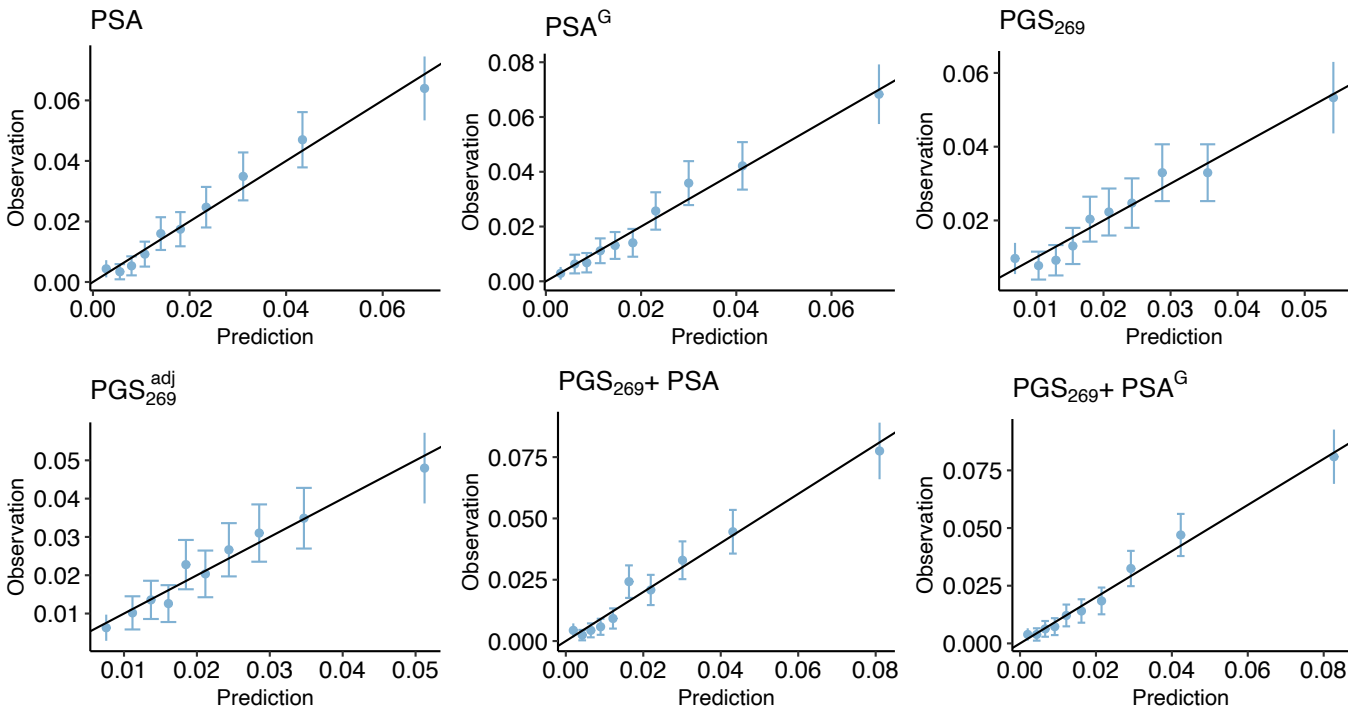



SELECT: Prostate Cancer (AFR pooled)

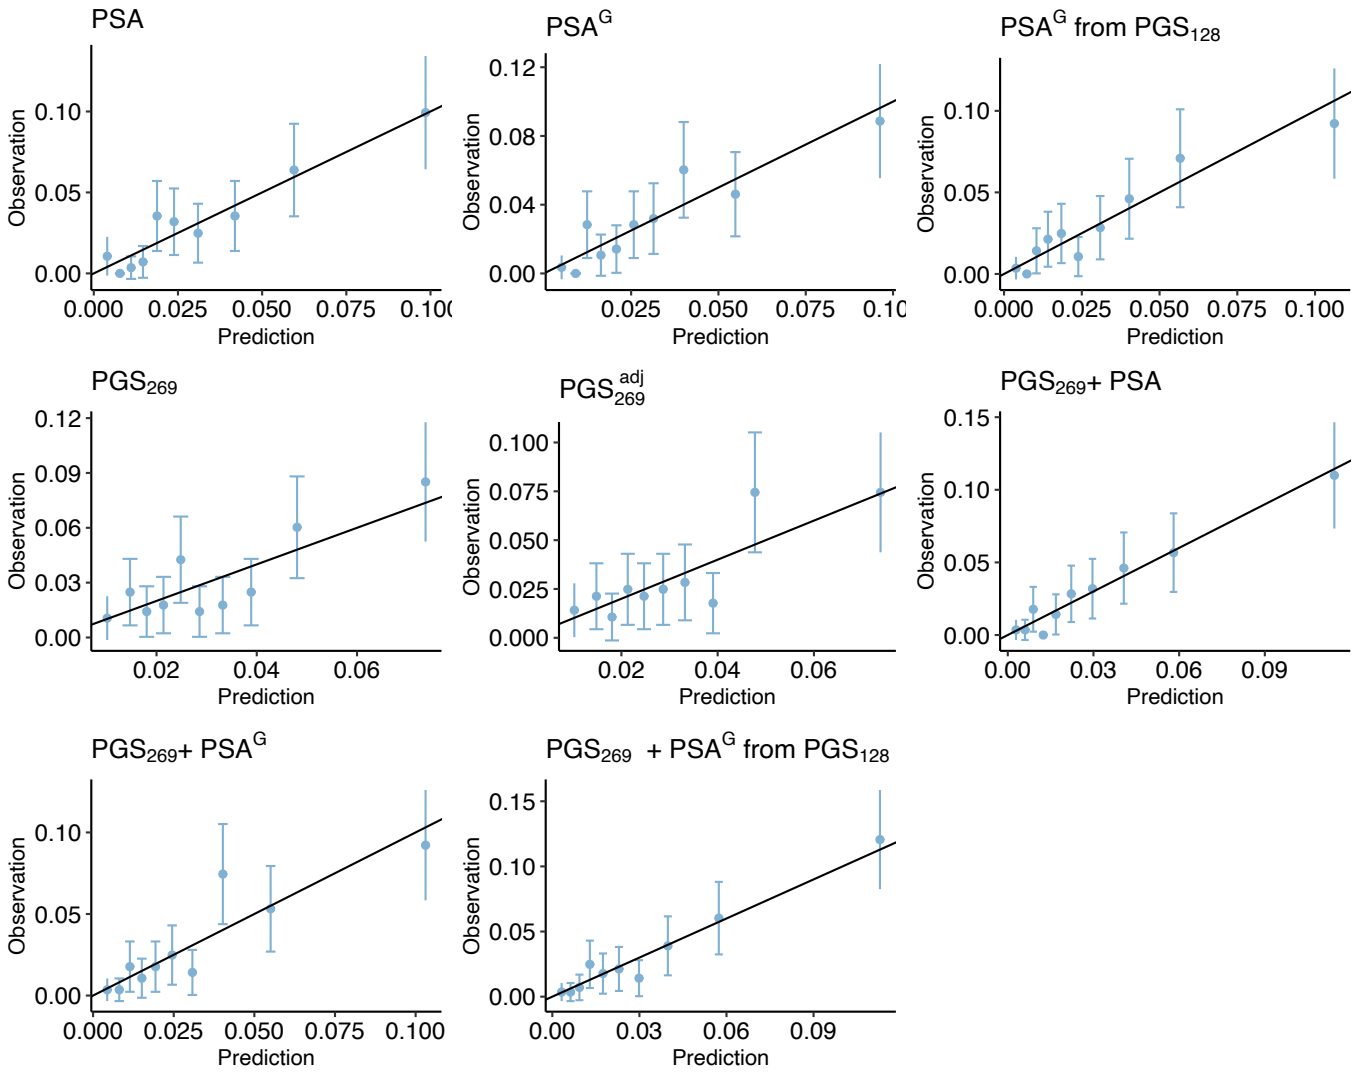

**Supplementary Figure 8:** Calibration plots for analyses of incident aggressive prostate cancer in the pooled SELECT population (106 cases and 23,667 controls) and stratified by ancestry. Predominantly European ancestry (EUR $\geq$ 0.80) subgroup includes 85 cases and 20,173 controls. Pooled African ancestry subgroup includes men of predominantly African ancestry (AFR $\geq$ 0.80) and intermediate African and European ancestry (0.20 $<$ AFR/EUR $<$ 0.80), for a total of 18 cases and 2733 controls.

SELECT: Aggressive Prostate Cancer (Pooled)

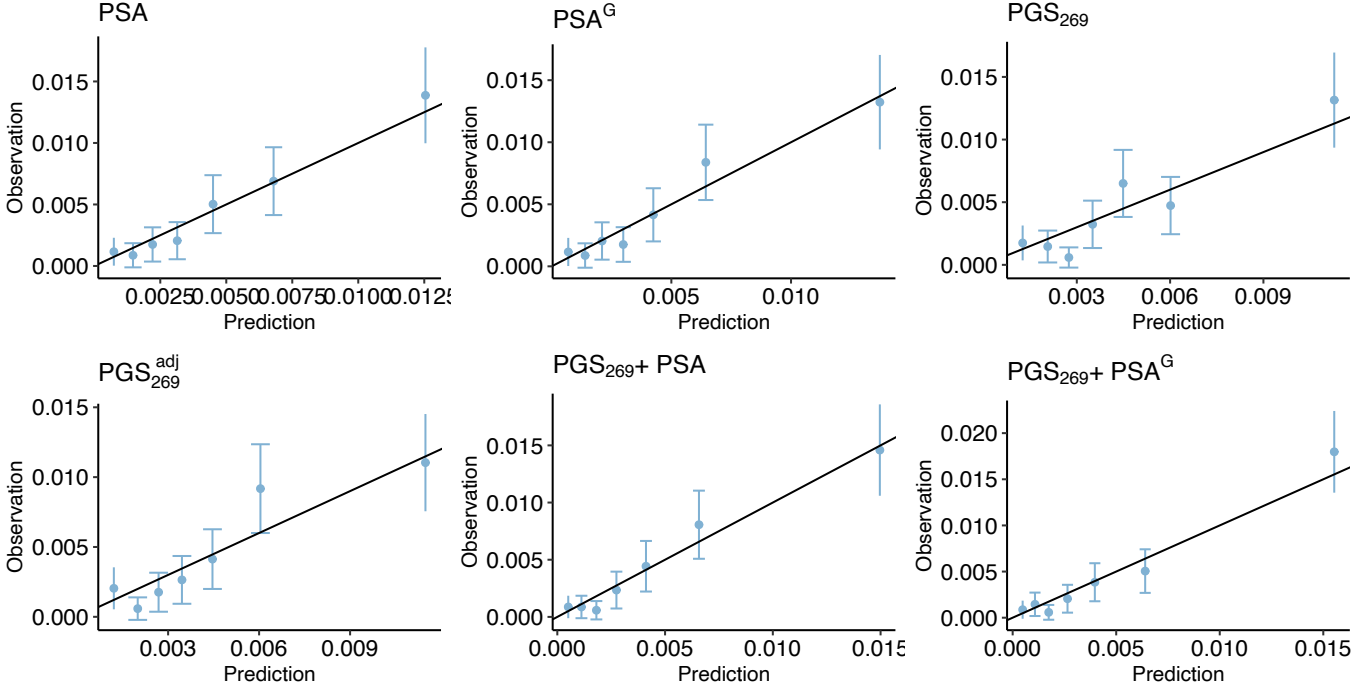

SELECT: Aggressive Prostate Cancer (EUR)

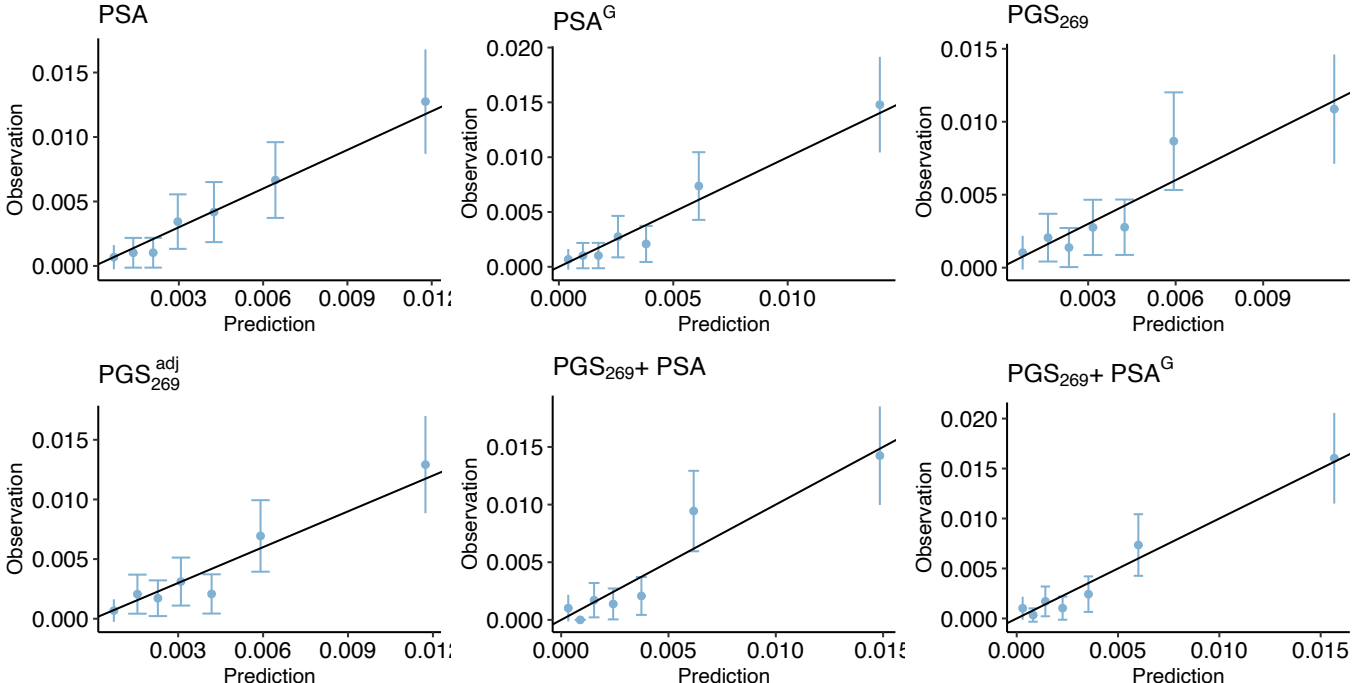

SELECT: Aggressive Prostate Cancer (AFR pooled)

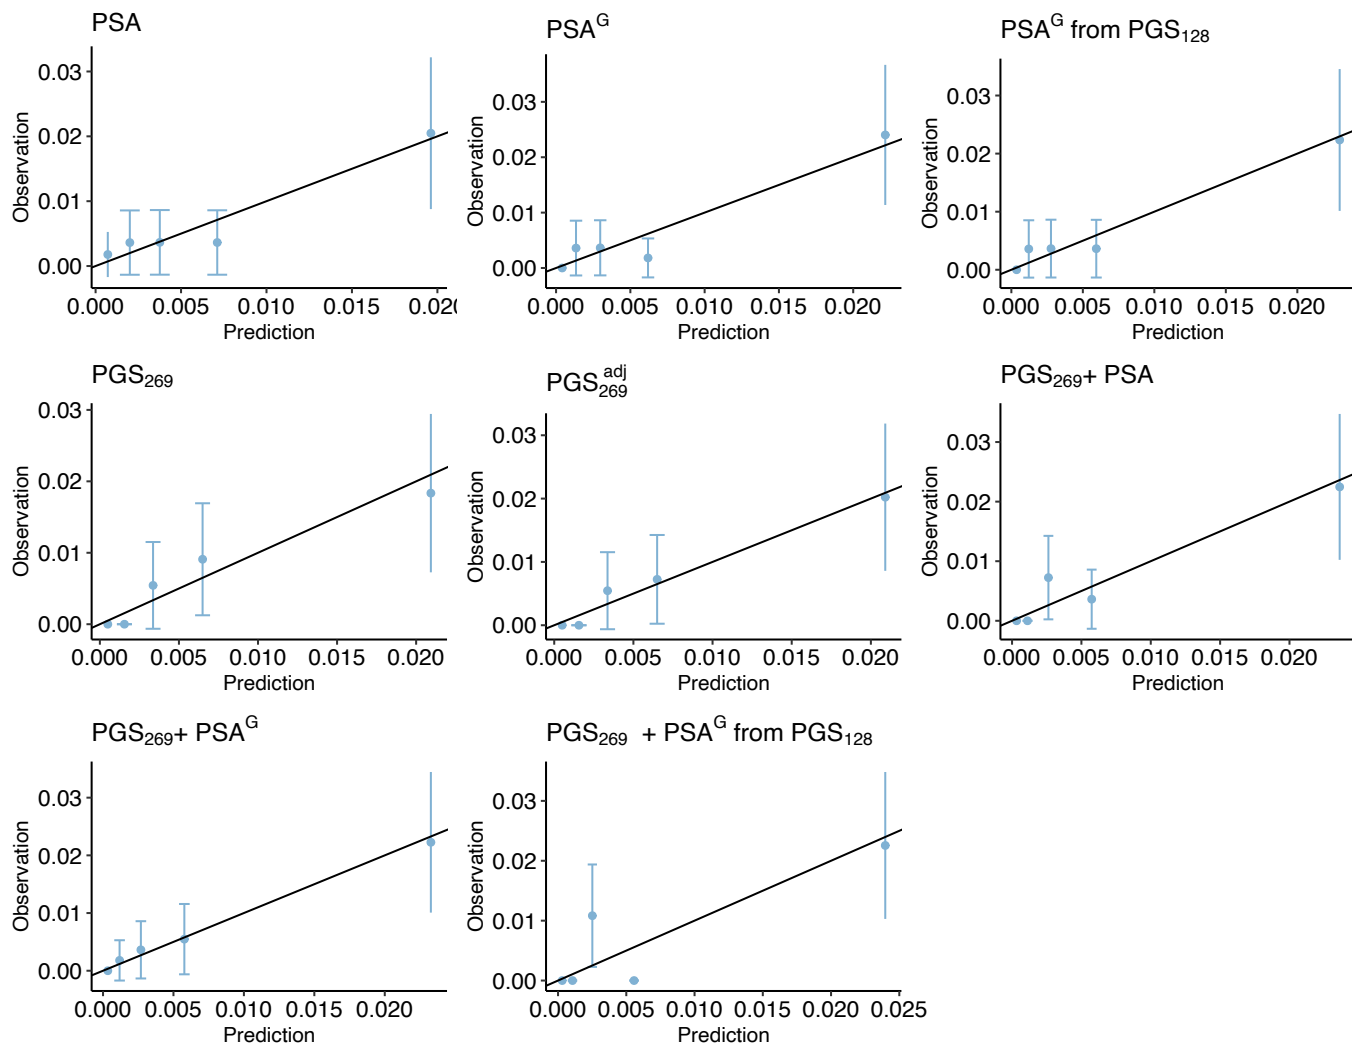

Supplement: Supplementary file [file media-1.pdf]
