# Supplementary material for: Genetically Adjusted PSA Levels for Prostate Cancer Screening
Source: bioRxiv or medRxiv preprint supplement (doi:10.1101/2022.04.18.22273850), 2023-05-19
Supplement: Supplementary file [file media-2.pdf]

**Supplementary Table 1: Heritability of PSA variation in European ancestry individuals without prostate cancer**

| Phenotype                          | Method  | Genetic Relatedness Matrix Parameters |            |             |                          | $h^2$           | (95% CI)        |
|------------------------------------|---------|---------------------------------------|------------|-------------|--------------------------|-----------------|-----------------|
|                                    |         | Kinship                               | LD $r^2$   | INFO        | ( $N_{\text{SNP}}$ )     |                 |                 |
| UKB median log(PSA)<br>n=26,491    | GCTA    | 0.025                                 | 0.80       | 0.80        | (2,109,931)              | 0.405           | (0.353 - 0.456) |
|                                    |         |                                       | 0.80       | Typed       | (563,257)                | 0.372           | (0.326 - 0.418) |
|                                    | LDAK    | 0.025                                 | 0.80       | 0.80        | (2,109,931)              | 0.302           | (0.266 - 0.339) |
|                                    |         |                                       | 0.98       | 0.95        | (2,629,389)              | 0.244           | (0.213 - 0.276) |
|                                    | GCTA    | 0.05                                  | 0.80       | 0.80        | (2,109,931)              | 0.408           | (0.359 - 0.457) |
|                                    |         |                                       | 0.80       | Typed       | (563,257)                | 0.376           | (0.332 - 0.420) |
| LDAK                               | 0.05    | 0.80                                  | 0.80       | (2,109,931) | 0.296                    | (0.261 - 0.331) |                 |
|                                    |         | 0.98                                  | 0.95       | (2,629,389) | 0.239                    | (0.209 - 0.269) |                 |
| UKB random intercept<br>n=26,491   | GCTA    | 0.025                                 | 0.80       | 0.80        | (2,109,931)              | 0.351           | (0.300 - 0.402) |
|                                    |         |                                       | 0.80       | Typed       | (563,257)                | 0.327           | (0.280 - 0.373) |
|                                    | LDAK    | 0.025                                 | 0.80       | 0.80        | (2,109,931)              | 0.270           | (0.233 - 0.307) |
|                                    |         |                                       | 0.98       | 0.95        | (2,629,389)              | 0.210           | (0.179 - 0.242) |
|                                    | GCTA    | 0.05                                  | 0.80       | 0.80        | (2,109,931)              | 0.358           | (0.309 - 0.407) |
|                                    |         |                                       | 0.80       | Typed       | (563,257)                | 0.333           | (0.289 - 0.377) |
| LDAK                               | 0.05    | 0.80                                  | 0.80       | (2,109,931) | 0.259                    | (0.224 - 0.294) |                 |
|                                    |         | 0.98                                  | 0.95       | (2,629,389) | 0.207                    | (0.178 - 0.237) |                 |
|                                    |         |                                       | 0.98       | Typed       | (563,257)                | 0.251           | (0.220 - 0.283) |
| Summary Statistics                 | Method  | Reference Panel                       |            | INFO        | ( $N_{\text{SNP}}$ )     | $h^2$           | (95% CI)        |
|                                    |         | Variants                              | LD Dataset |             |                          |                 |                 |
| UKB median log(PSA)<br>n=26,491    | LDAK    | HapMap3                               | UKB GBR    | 0.30        | (1,127,342)              | 0.385           | (0.310 - 0.460) |
|                                    |         |                                       |            | 0.30        | (1,127,337) <sup>1</sup> | 0.349           | (0.275 - 0.424) |
|                                    |         |                                       |            | 0.95        | (1,118,359) <sup>1</sup> | 0.350           | (0.275 - 0.425) |
|                                    | HDL     | HapMap3                               | UKB GBR    | 0.30        | (1,029,876)              | 0.252           | (0.207 - 0.298) |
| LDSR                               | HapMap3 | 1000G EUR                             | 0.30       | (1,133,218) | 0.206                    | (0.154 - 0.257) |                 |
| Meta-analysis log(PSA)<br>n=85,824 | LDAK    | HapMap3                               | UKB GBR    | 0.30        | (1,168,859)              | 0.332           | (0.307 - 0.357) |
|                                    |         |                                       |            | 0.30        | (1,168,854) <sup>1</sup> | 0.300           | (0.287 - 0.311) |
|                                    | HDL     | HapMap3                               | UKB EUR    | 0.30        | (1,029,876)              | 0.195           | (0.157 - 0.233) |
| LDSR                               | HapMap3 | 1000G EUR                             | 0.30       | (1,136,374) | 0.188                    | (0.151 - 0.225) |                 |

<sup>1</sup> Excluding variants with large effect, using cutoff=0.01 for maximum variance explained

Abbreviations:

INFO Minimum imputation quality

HDL High-definition likelihood method, as described in Ning et al. (PMID: 32601477)

GBR British white individuals

LDSR LD score regression

**Supplementary Table 2:** Genome-wide significant variants associated with PSA levels in the UK Biobank cohort (N=26,491). Lead variants were identified using LD-based clumping at  $r^2 < 0.01$  in  $\pm 10$ Mb windows

| Region          | Position (b37) | Nearest Gene           | Variant ID  | EA | OA | EAF   | $\beta^1$ | (SE)    | P         | P <sub>RI</sub> |
|-----------------|----------------|------------------------|-------------|----|----|-------|-----------|---------|-----------|-----------------|
| 1p22.3          | 88197017       | <i>PKN2-AS1</i>        | rs12731909  | C  | T  | 0.484 | 0.041     | (0.007) | 9.12E-10  | 3.81E-09        |
| 2p21            | 43594483       | <i>THADA</i>           | rs79625619  | T  | A  | 0.100 | -0.063    | (0.011) | 1.27E-08  | 3.48E-08        |
| 2p16.1          | 60762502       | <i>BCL11A</i>          | rs2556378   | T  | G  | 0.161 | 0.058     | (0.009) | 1.45E-10  | 3.56E-10        |
| 2p15            | 63277843       | <i>OTX1</i>            | rs58235267  | G  | C  | 0.484 | 0.038     | (0.007) | 1.50E-08  | 5.41E-07        |
| 3q27.3          | 186754957      | <i>ST6GAL1</i>         | rs3936289   | C  | T  | 0.242 | 0.041     | (0.008) | 1.58E-07  | 7.07E-09        |
| 5p15.33         | 1341101        | <i>CLPTM1L</i>         | rs31487     | C  | G  | 0.444 | -0.064    | (0.007) | 1.78E-21  | 6.11E-17        |
| 6p21.32         | 32682812       | <i>HLA-DQB1-AS1</i>    | rs9275602   | A  | C  | 0.191 | -0.048    | (0.009) | 1.83E-08  | 9.64E-07        |
| 6p21.1          | 43710381       | <i>POLR1C</i>          | rs10807290  | C  | T  | 0.475 | 0.045     | (0.007) | 2.21E-11  | 1.13E-07        |
| 7p15.2          | 27989768       | <i>JAZF1</i>           | rs739704    | A  | G  | 0.253 | -0.043    | (0.008) | 2.02E-08  | 1.26E-04        |
| 8p21.2          | 23535219       | <i>NKX3-1</i>          | rs13262167  | C  | A  | 0.414 | 0.067     | (0.007) | 1.01E-22  | 1.26E-19        |
| 8q24.21         | 128318755      | <i>CASC8 – PCAT1</i>   | rs10107982  | C  | T  | 0.277 | -0.053    | (0.008) | 1.23E-12  | 6.15E-09        |
| 8q24.21         | 128413305      | <i>CASC8</i>           | rs6983267   | T  | G  | 0.481 | -0.054    | (0.007) | 8.70E-16  | 2.45E-14        |
| 10q11.22        | 51549496       | <i>MSMB</i>            | rs10993994  | T  | C  | 0.386 | 0.087     | (0.007) | 1.06E-36  | 4.87E-26        |
| 10q26.12        | 122633607      | <i>WDR11</i>           | rs7080550   | G  | C  | 0.365 | 0.049     | (0.007) | 1.54E-12  | 2.91E-10        |
| 10q26.12        | 123048008      | <i>LINC01153</i>       | rs10886900  | G  | A  | 0.231 | 0.103     | (0.008) | 1.75E-38  | 2.49E-32        |
| 10q26.13        | 123186164      | <i>RN7SKP167</i>       | rs201552570 | C  | CA | 0.052 | -0.118    | (0.015) | 7.02E-15  | 4.56E-13        |
| 10q26.13        | 123349324      | <i>FGFR2</i>           | rs45631563  | T  | A  | 0.046 | 0.090     | (0.016) | 2.62E-08  | 3.30E-05        |
| 11p13           | 34770077       | <i>EHF – APIP</i>      | rs10742324  | C  | G  | 0.291 | -0.054    | (0.007) | 3.54E-13  | 8.78E-10        |
| 12q24.21        | 115094260      | <i>TBX3</i>            | rs11067228  | G  | A  | 0.451 | -0.045    | (0.007) | 1.65E-11  | 2.46E-09        |
| 13q14.3         | 51130374       | <i>DLEU1</i>           | rs35681675  | TC | T  | 0.389 | 0.042     | (0.007) | 1.37E-09  | 1.29E-08        |
| 17q12           | 36097775       | <i>HNF1B</i>           | rs11263761  | G  | A  | 0.481 | -0.062    | (0.007) | 4.32E-20  | 8.87E-15        |
| 18q23           | 76765837       | <i>SALL3</i>           | rs6506878   | T  | G  | 0.320 | -0.041    | (0.007) | 1.35E-08  | 6.75E-07        |
| 19q13.33        | 51323947       | <i>KLK1</i>            | rs2659104   | A  | G  | 0.317 | 0.055     | (0.007) | 3.39E-14  | 9.62E-10        |
| 19q13.33        | 51340794       | <i>KLK15</i>           | rs2659053   | A  | G  | 0.394 | 0.082     | (0.007) | 5.38E-33  | 1.83E-27        |
| 19q13.33        | 51360768       | <i>KLK3</i>            | rs266877    | A  | G  | 0.048 | -0.094    | (0.016) | 2.29E-09  | 3.49E-09        |
| 19q13.33        | 51361757       | <i>KLK3</i>            | rs17632542  | C  | T  | 0.077 | -0.375    | (0.012) | 1.69E-202 | 4.16E-155       |
| 19q13.33        | 51399496       | <i>KLKP1</i>           | rs2659110   | T  | C  | 0.114 | -0.076    | (0.011) | 6.39E-13  | 9.41E-15        |
| 20q11.21-q11.22 | 32127671       | <i>CBFA2T2</i>         | rs2150165   | T  | A  | 0.104 | 0.069     | (0.011) | 3.60E-10  | 4.72E-07        |
| Xp22.11         | 24065653       | <i>EIF2S3 – KLHL15</i> | rs12389566  | T  | C  | 0.331 | 0.033     | (0.005) | 1.73E-10  | 8.78E-08        |
| Xq13.1          | 70117073       | <i>TEX11</i>           | rs186347618 | T  | A  | 0.368 | 0.039     | (0.005) | 7.89E-15  | 6.66E-13        |

<sup>1</sup> Per allele change in log(PSA)

Abbreviations:

EA Effect allele for which the change in log(PSA) is modelled

OA Other allele

EAF Effect allele frequency

P<sub>RI</sub> P-value from the analysis of random intercepts extracted from fitted linear mixed models

**Supplementary Table 3:** Genome-wide significant variants associated with PSA levels in the multi-ancestry meta-analysis (N=95,768). A total of 128 lead variants were identified using LD-based clumping at  $r^2 < 0.01$  within  $\pm 10$ Mb windows.

| Region  | Position (b37) | Variant ID | Effect Allele | Other Allele                                          | Fixed-effects Meta-analysis (METAL) |           |         |                    |                    | Meta-Regression (MR-MEGA) |                      |                      | New <sup>2</sup> |
|---------|----------------|------------|---------------|-------------------------------------------------------|-------------------------------------|-----------|---------|--------------------|--------------------|---------------------------|----------------------|----------------------|------------------|
|         |                |            |               |                                                       | EAF                                 | $\beta^1$ | SE      | $P_{\text{METAL}}$ | $P_{\text{Het-Q}}$ | $P_{\text{MEGA}}$         | $P_{\text{Het-Anc}}$ | $P_{\text{Het-Res}}$ |                  |
| 1p32.3  | 51237409       | rs12569177 | C             | G                                                     | 0.428                               | 0.026     | (0.004) | 3.2E-13            | 0.89               | 3.5E-11                   | 0.59                 | 0.80                 | yes              |
| 1p22.3  | 88199778       | rs12131120 | T             | A                                                     | 0.493                               | 0.033     | (0.004) | 1.6E-19            | 0.38               | 3.9E-18                   | 0.12                 | 0.36                 | no               |
| 1p13.2  | 112264274      | rs2076591  | C             | T                                                     | 0.216                               | 0.032     | (0.004) | 2.6E-13            | 0.094              | 4.9E-12                   | 0.10                 | 0.77                 | yes              |
| 1q21.3  | 154868055      | rs4845681  | T             | G                                                     | 0.412                               | 0.022     | (0.004) | 7.7E-09            | 0.15               | 5.3E-07                   | 0.74                 | 0.13                 | yes              |
| 1q25.3  | 184191716      | rs12046452 | C             | T                                                     | 0.622                               | 0.021     | (0.004) | 9.0E-09            | 0.95               | 8.7E-07                   | 0.95                 | 0.19                 | yes              |
| 1q32.1  | 205632217      | rs71152447 | G             | GGCCGAC<br>AGCCCTTC<br>TGCTGGCT<br>CGGTGGG<br>GCCCAGC | 0.047                               | 0.163     | (0.024) | 9.9E-12            | 0.27               | 1.2E-09                   | 0.80                 | 0.025                | no               |
| 1q32.1  | 205636334      | rs4951018  | C             | A                                                     | 0.230                               | 0.032     | (0.004) | 2.7E-13            | 0.52               | 2.5E-12                   | 0.058                | 0.092                | no               |
| 1q41    | 219694903      | rs12034581 | C             | A                                                     | 0.495                               | 0.025     | (0.004) | 2.5E-12            | 0.074              | 3.5E-11                   | 0.14                 | 0.49                 | yes              |
| 1q41    | 219954267      | rs6664688  | G             | A                                                     | 0.216                               | 0.025     | (0.005) | 3.9E-08            | 0.025              | 1.9E-07                   | 0.084                | 1.2E-03              | yes              |
| 2p24.2  | 18911674       | rs12710685 | G             | C                                                     | 0.105                               | 0.033     | (0.006) | 2.3E-08            | 0.26               | 1.7E-06                   | 0.73                 | 0.57                 | yes              |
| 2p24.1  | 20880833       | rs10193919 | T             | C                                                     | 0.345                               | 0.031     | (0.004) | 1.5E-15            | 0.84               | 3.7E-13                   | 0.95                 | 0.25                 | yes              |
| 2p23.3  | 25463871       | rs734693   | T             | C                                                     | 0.715                               | 0.023     | (0.004) | 3.9E-08            | 0.054              | 7.4E-08                   | 0.040                | 0.37                 | yes              |
| 2p21    | 43072828       | rs1123695  | G             | C                                                     | 0.659                               | 0.031     | (0.004) | 3.3E-16            | 0.80               | 6.7E-14                   | 0.89                 | 0.81                 | yes              |
| 2p21    | 43618819       | rs11899863 | C             | T                                                     | 0.902                               | 0.045     | (0.006) | 1.7E-13            | 0.48               | 2.2E-11                   | 0.56                 | 0.078                | yes              |
| 2p16.1  | 60759747       | rs2556375  | G             | T                                                     | 0.176                               | 0.057     | (0.005) | 1.8E-32            | 0.33               | 5.2E-30                   | 0.54                 | 0.42                 | no               |
| 2p15    | 63277843       | rs58235267 | G             | C                                                     | 0.482                               | 0.026     | (0.004) | 4.9E-13            | 0.014              | 1.1E-12                   | 0.016                | 0.57                 | yes              |
| 2p13.2  | 72059504       | rs11679946 | T             | C                                                     | 0.674                               | 0.022     | (0.004) | 2.6E-08            | 0.23               | 1.3E-06                   | 0.79                 | 0.35                 | yes              |
| 2q33.1  | 198929083      | rs34388051 | A             | G                                                     | 0.671                               | 0.022     | (0.004) | 2.2E-08            | 0.62               | 1.4E-06                   | 0.65                 | 0.52                 | yes              |
| 3q13.2  | 113290793      | rs4682495  | A             | C                                                     | 0.573                               | 0.021     | (0.004) | 2.9E-09            | 0.12               | 1.6E-07                   | 0.40                 | 0.081                | no               |
| 3q21.3  | 128067275      | rs11709611 | C             | T                                                     | 0.120                               | 0.036     | (0.006) | 2.0E-10            | 0.97               | 2.7E-08                   | 0.98                 | 0.90                 | yes              |
| 3q23    | 141115219      | rs1582874  | C             | T                                                     | 0.442                               | 0.030     | (0.004) | 1.0E-16            | 0.36               | 1.1E-14                   | 0.37                 | 0.79                 | no               |
| 3q25.33 | 160130592      | rs10673842 | TTATC         | T                                                     | 0.522                               | 0.023     | (0.004) | 2.2E-08            | 0.11               | 2.9E-07                   | 0.15                 | 0.46                 | yes              |

|         |           |                 |    |   |       |       |         |         |       |         |         |       |     |
|---------|-----------|-----------------|----|---|-------|-------|---------|---------|-------|---------|---------|-------|-----|
| 3q27.2  | 185246981 | rs4012714       | A  | G | 0.579 | 0.025 | (0.004) | 1.1E-08 | 0.11  | 7.7E-08 | 0.11    | 0.81  | yes |
| 3q27.3  | 186746994 | rs12629450      | C  | G | 0.171 | 0.031 | (0.005) | 2.6E-10 | 0.65  | 2.2E-08 | 0.58    | 0.69  | yes |
| 3q28    | 189482770 | rs6765473       | T  | C | 0.881 | 0.037 | (0.006) | 3.2E-10 | 0.31  | 6.0E-09 | 0.23    | 0.73  | yes |
| 4p15.2  | 24410024  | rs4276269       | G  | A | 0.263 | 0.023 | (0.004) | 2.0E-08 | 0.91  | 1.5E-06 | 0.82    | 0.59  | yes |
| 4q31.22 | 146890261 | rs9968429       | G  | A | 0.370 | 0.032 | (0.004) | 6.3E-18 | 0.061 | 1.0E-16 | 0.056   | 0.29  | no  |
| 4q32.1  | 157497921 | rs13115840      | A  | G | 0.355 | 0.031 | (0.004) | 4.3E-17 | 0.70  | 2.7E-14 | 0.86    | 0.56  | no  |
| 5p15.33 | 1285974   | rs7705526       | A  | C | 0.331 | 0.023 | (0.004) | 1.2E-08 | 0.46  | 6.0E-07 | 0.47    | 0.97  | no  |
| 5p15.33 | 1322087   | rs401681        | C  | T | 0.560 | 0.059 | (0.004) | 7.0E-54 | 0.47  | 1.5E-52 | 0.12    | 0.84  | no  |
| 5q14.3  | 92052005  | rs7732515       | A  | T | 0.227 | 0.033 | (0.004) | 3.5E-14 | 0.52  | 5.3E-12 | 0.86    | 0.46  | yes |
| 5q35.2  | 172945918 | rs889017        | C  | A | 0.230 | 0.024 | (0.004) | 2.6E-08 | 0.081 | 1.3E-07 | 0.074   | 0.19  | yes |
| 6p22.3  | 15463139  | rs926309        | T  | G | 0.374 | 0.026 | (0.004) | 1.6E-12 | 0.81  | 1.4E-10 | 0.69    | 0.88  | yes |
| 6p22.3  | 16515154  | rs236961        | T  | C | 0.353 | 0.026 | (0.004) | 8.6E-12 | 0.10  | 7.6E-11 | 0.10    | 0.44  | yes |
| 6p22.1  | 29915061  | rs2248162       | C  | T | 0.666 | 0.025 | (0.004) | 3.6E-10 | 0.26  | 9.7E-09 | 0.24    | 0.36  | yes |
| 6p21.31 | 34212537  | rs551980123     | TG | T | 0.043 | 0.069 | (0.011) | 1.6E-10 | 0.14  | 2.1E-08 | 0.91    | 0.14  | yes |
| 6p21.1  | 43711981  | rs1535507       | T  | C | 0.164 | 0.048 | (0.005) | 1.5E-22 | 0.063 | 1.4E-22 | 1.8E-03 | 0.044 | no  |
| 6q22.33 | 129168057 | rs73583119      | A  | T | 0.929 | 0.193 | (0.035) | 3.5E-08 | 0.12  | -       | -       | -     | yes |
| 7p15.3  | 20909622  | rs204592        | G  | A | 0.517 | 0.022 | (0.004) | 1.2E-09 | 0.24  | 1.9E-08 | 0.21    | 0.45  | yes |
| 7p15.3  | 21839896  | rs6956349       | T  | C | 0.427 | 0.021 | (0.004) | 8.6E-09 | 0.78  | 6.1E-07 | 0.67    | 0.56  | yes |
| 7p15.2  | 27281792  | rs17437810      | A  | G | 0.021 | 0.077 | (0.013) | 8.0E-09 | 0.98  | 8.5E-07 | 0.96    | 0.55  | yes |
| 7p15.2  | 27483166  | rs10250340      | A  | G | 0.321 | 0.023 | (0.004) | 2.0E-09 | 0.047 | 1.4E-08 | 0.073   | 0.030 | yes |
| 7p15.2  | 27975919  | rs67152137      | G  | C | 0.740 | 0.048 | (0.004) | 8.6E-31 | 0.29  | 1.9E-28 | 0.13    | 0.78  | no  |
| 8p21.2  | 23437981  | rs2928681       | C  | A | 0.413 | 0.031 | (0.004) | 3.5E-18 | 0.10  | 5.7E-17 | 0.045   | 0.66  | no  |
| 8p21.2  | 23529521  | rs1160267       | G  | A | 0.430 | 0.070 | (0.004) | 6.3E-83 | 0.89  | 9.6E-78 | 0.78    | 0.69  | no  |
| 8q12.1  | 57138676  | rs36112366      | T  | G | 0.886 | 0.037 | (0.006) | 7.3E-11 | 0.73  | 6.9E-09 | 0.60    | 0.84  | yes |
| 8q12.1  | 57834357  | rs4738555       | C  | T | 0.434 | 0.031 | (0.004) | 3.2E-17 | 0.22  | 2.1E-16 | 0.028   | 0.76  | no  |
| 8q21.13 | 81811566  | 8:81811566_CA_C | CA | C | 0.590 | 0.024 | (0.004) | 7.6E-11 | 0.13  | 9.1E-10 | 0.090   | 0.54  | yes |
| 8q23.1  | 108849527 | rs1494920       | T  | C | 0.604 | 0.020 | (0.004) | 4.8E-08 | 0.84  | 1.7E-06 | 0.46    | 0.55  | yes |
| 8q24.21 | 127817460 | rs7843726       | G  | C | 0.145 | 0.030 | (0.005) | 1.7E-08 | 0.073 | 2.0E-07 | 0.14    | 0.24  | yes |
| 8q24.21 | 128093297 | rs1016343       | T  | C | 0.205 | 0.035 | (0.004) | 3.6E-15 | 0.67  | 9.2E-13 | 0.94    | 0.80  | yes |

|          |           |             |   |     |       |       |         |          |         |          |         |         |     |
|----------|-----------|-------------|---|-----|-------|-------|---------|----------|---------|----------|---------|---------|-----|
| 8q24.21  | 128318755 | rs10107982  | T | C   | 0.728 | 0.046 | (0.004) | 4.1E-30  | 0.85    | 6.9E-27  | 0.98    | 0.25    | no  |
| 8q24.21  | 128413305 | rs6983267   | G | T   | 0.512 | 0.051 | (0.004) | 2.6E-45  | 0.49    | 7.1E-43  | 0.45    | 0.31    | no  |
| 9q22.32  | 99146751  | rs7020681   | C | T   | 0.214 | 0.027 | (0.005) | 1.4E-09  | 6.1E-03 | 8.2E-10  | 5.6E-03 | 0.74    | yes |
| 9q33.1   | 118258080 | rs150402584 | T | TG  | 0.129 | 0.035 | (0.006) | 9.0E-10  | 0.14    | 1.6E-08  | 0.17    | 0.37    | yes |
| 9q33.1   | 120475302 | rs4986790   | A | G   | 0.942 | 0.065 | (0.008) | 7.1E-17  | 0.51    | 6.7E-15  | 0.51    | 0.73    | no  |
| 9q33.2   | 123643426 | rs59482735  | T | TAA | 0.321 | 0.032 | (0.005) | 2.9E-12  | 0.23    | 2.2E-10  | 0.44    | 0.087   | no  |
| 10p12.31 | 22363979  | rs3011633   | C | T   | 0.221 | 0.040 | (0.004) | 5.9E-20  | 0.71    | 1.1E-17  | 0.36    | 0.81    | no  |
| 10p12.2  | 23398448  | rs1857279   | C | G   | 0.662 | 0.025 | (0.004) | 3.9E-11  | 0.90    | 5.3E-09  | 0.71    | 0.41    | yes |
| 10p12.1  | 28096754  | rs2815506   | A | G   | 0.804 | 0.036 | (0.005) | 4.9E-15  | 0.55    | 3.2E-13  | 0.50    | 0.44    | no  |
| 10q11.23 | 51549496  | rs10993994  | T | C   | 0.402 | 0.086 | (0.004) | 7.3E-87  | 0.16    | 3.0E-84  | 0.20    | 0.68    | no  |
| 10q25.2  | 111991733 | rs562417881 | G | GT  | 0.840 | 0.035 | (0.006) | 5.6E-09  | 0.21    | 2.5E-07  | 0.43    | 0.36    | yes |
| 10q26.12 | 122631067 | rs9325569   | A | G   | 0.340 | 0.051 | (0.004) | 9.9E-41  | 0.40    | 1.2E-38  | 0.39    | 0.72    | no  |
| 10q26.12 | 123049264 | rs10886902  | C | T   | 0.231 | 0.099 | (0.004) | 8.2E-118 | 0.92    | 6.2E-116 | 0.83    | 0.58    | no  |
| 10q26.13 | 123135200 | rs10788173  | C | T   | 0.403 | 0.021 | (0.004) | 2.9E-08  | 0.27    | 4.5E-07  | 0.19    | 0.86    | yes |
| 10q26.13 | 123185303 | rs10749415  | A | G   | 0.920 | 0.108 | (0.008) | 1.8E-45  | 0.72    | 1.7E-42  | 0.75    | 0.42    | no  |
| 10q26.13 | 123349324 | rs45631563  | T | A   | 0.045 | 0.089 | (0.009) | 7.9E-23  | 0.28    | 4.5E-20  | 0.97    | 0.082   | no  |
| 10q26.13 | 126737579 | rs3012065   | C | T   | 0.320 | 0.022 | (0.004) | 2.2E-08  | 0.70    | 1.6E-06  | 0.76    | 0.99    | yes |
| 11p15.5  | 197557    | rs7103852   | G | A   | 0.878 | 0.041 | (0.007) | 1.2E-09  | 0.86    | 7.2E-08  | 0.64    | 0.60    | yes |
| 11p13    | 34718279  | rs553481604 | G | GT  | 0.697 | 0.031 | (0.005) | 1.7E-11  | 0.59    | 5.4E-10  | 0.21    | 7.4E-03 | no  |
| 11p13    | 34780936  | rs10466455  | C | T   | 0.397 | 0.038 | (0.004) | 8.0E-26  | 0.19    | 2.0E-23  | 0.20    | 0.80    | no  |
| 11q13.5  | 76153279  | rs58015965  | G | A   | 0.688 | 0.021 | (0.004) | 4.0E-08  | 0.84    | 1.9E-06  | 0.49    | 0.78    | yes |
| 11q22.2  | 102396607 | rs12285347  | C | T   | 0.452 | 0.038 | (0.004) | 2.6E-25  | 0.17    | 5.5E-24  | 0.13    | 0.98    | no  |
| 11q22.2  | 102438778 | rs7129424   | A | G   | 0.559 | 0.024 | (0.004) | 2.5E-11  | 0.42    | 1.8E-09  | 0.54    | 0.52    | yes |
| 12p13.31 | 9222286   | rs1805664   | T | C   | 0.334 | 0.022 | (0.004) | 9.2E-09  | 0.12    | 1.1E-07  | 0.18    | 0.96    | yes |
| 12q14.3  | 66393756  | rs74097857  | T | C   | 0.872 | 0.033 | (0.006) | 1.2E-09  | 0.75    | 8.7E-08  | 0.54    | 0.24    | yes |
| 12q21.31 | 84994000  | rs61928422  | T | C   | 0.169 | 0.027 | (0.005) | 1.1E-08  | 0.027   | 9.6E-09  | 0.015   | 0.27    | yes |
| 12q24.21 | 115099805 | rs10774760  | G | A   | 0.504 | 0.042 | (0.004) | 2.4E-30  | 0.98    | 3.3E-27  | 0.84    | 0.78    | no  |
| 12q24.21 | 115155460 | rs11067251  | G | T   | 0.584 | 0.022 | (0.004) | 1.9E-09  | 0.10    | 1.4E-08  | 0.077   | 0.96    | yes |
| 12q24.23 | 118855432 | rs1045542   | G | A   | 0.907 | 0.047 | (0.006) | 1.2E-13  | 0.69    | 1.8E-11  | 0.76    | 0.47    | yes |

|          |          |             |    |     |       |       |         |          |         |          |         |         |     |
|----------|----------|-------------|----|-----|-------|-------|---------|----------|---------|----------|---------|---------|-----|
| 13q14.3  | 51087443 | rs202346    | A  | C   | 0.253 | 0.044 | (0.004) | 1.8E-27  | 0.38    | 4.0E-26  | 0.025   | 0.53    | no  |
| 13q14.3  | 51165912 | rs12869529  | A  | G   | 0.960 | 0.064 | (0.009) | 9.4E-12  | 0.80    | 9.6E-10  | 0.69    | 0.031   | yes |
| 13q14.3  | 51445360 | rs9563006   | A  | G   | 0.443 | 0.024 | (0.004) | 5.6E-11  | 0.81    | 1.9E-10  | 0.034   | 0.78    | no  |
| 13q22.1  | 74055303 | rs1361057   | C  | T   | 0.261 | 0.023 | (0.004) | 3.3E-08  | 0.30    | 1.6E-06  | 0.53    | 0.43    | yes |
| 13q32.1  | 95799006 | rs61965887  | A  | G   | 0.062 | 0.059 | (0.008) | 3.7E-14  | 0.74    | 2.5E-12  | 0.51    | 0.57    | yes |
| 14q13.3  | 37240591 | rs712329    | G  | A   | 0.432 | 0.021 | (0.004) | 2.0E-08  | 0.031   | 1.2E-07  | 0.083   | 0.22    | yes |
| 14q32.13 | 94838142 | rs112635299 | G  | T   | 0.979 | 0.106 | (0.013) | 1.2E-15  | 0.26    | 3.4E-14  | 0.19    | 0.36    | yes |
| 14q32.13 | 95104745 | rs72695000  | C  | T   | 0.825 | 0.054 | (0.005) | 7.4E-28  | 0.76    | 4.5E-26  | 0.19    | 0.12    | no  |
| 15q22.31 | 66941399 | rs8038722   | G  | A   | 0.499 | 0.020 | (0.004) | 3.2E-08  | 0.68    | 3.9E-06  | 1.00    | 0.65    | yes |
| 16p13.3  | 4318206  | rs251739    | G  | A   | 0.506 | 0.033 | (0.004) | 6.6E-20  | 0.13    | 2.0E-17  | 0.46    | 0.13    | no  |
| 16p13.13 | 11201428 | rs9933507   | C  | T   | 0.430 | 0.023 | (0.004) | 3.8E-10  | 0.84    | 5.2E-08  | 0.90    | 0.74    | yes |
| 16q23.1  | 77507275 | rs7206309   | C  | T   | 0.316 | 0.039 | (0.004) | 1.6E-22  | 0.53    | 3.5E-20  | 0.54    | 0.56    | no  |
| 16q24.1  | 86554784 | rs13334022  | T  | C   | 0.109 | 0.042 | (0.006) | 3.4E-11  | 0.17    | 5.7E-10  | 0.14    | 0.45    | yes |
| 17p13.3  | 1994071  | rs3760230   | C  | G   | 0.433 | 0.020 | (0.004) | 2.8E-08  | 0.63    | 1.7E-06  | 0.58    | 0.56    | yes |
| 17p13.1  | 7571752  | rs78378222  | G  | T   | 0.012 | 0.112 | (0.018) | 2.8E-10  | 0.90    | 3.6E-08  | 0.86    | 0.85    | yes |
| 17p13.1  | 7793367  | rs34009884  | C  | CTG | 0.104 | 0.035 | (0.006) | 1.1E-08  | 0.20    | 1.7E-07  | 0.26    | 0.29    | yes |
| 17p12    | 12320741 | rs7219536   | T  | C   | 0.495 | 0.025 | (0.004) | 5.7E-12  | 0.23    | 2.0E-10  | 0.30    | 0.60    | yes |
| 17p12    | 12556260 | rs9889266   | C  | A   | 0.574 | 0.023 | (0.004) | 8.9E-10  | 0.62    | 4.4E-08  | 0.65    | 0.97    | yes |
| 17q12    | 36099952 | rs10908278  | A  | T   | 0.525 | 0.052 | (0.004) | 2.1E-46  | 0.017   | 2.8E-44  | 0.16    | 0.017   | no  |
| 18q23    | 76777252 | rs71279357  | A  | T   | 0.725 | 0.035 | (0.005) | 1.8E-12  | 0.80    | 1.3E-10  | 0.57    | 0.97    | yes |
| 19q12    | 32055024 | rs11084590  | C  | T   | 0.691 | 0.035 | (0.004) | 3.4E-18  | 0.39    | 2.4E-16  | 0.48    | 0.91    | no  |
| 19q13.32 | 46229711 | rs6509234   | G  | T   | 0.822 | 0.028 | (0.005) | 7.7E-09  | 0.066   | 1.0E-07  | 0.18    | 0.28    | yes |
| 19q13.33 | 49206462 | rs681343    | T  | C   | 0.483 | 0.020 | (0.004) | 4.4E-08  | 0.70    | 2.4E-06  | 0.65    | 0.70    | yes |
| 19q13.33 | 51225544 | rs890863    | G  | A   | 0.656 | 0.023 | (0.004) | 1.1E-08  | 0.44    | 3.1E-07  | 0.43    | 0.22    | yes |
| 19q13.33 | 51323501 | rs1054713   | A  | G   | 0.324 | 0.037 | (0.004) | 4.8E-22  | 5.9E-04 | 2.1E-22  | 8.7E-04 | 0.076   | no  |
| 19q13.33 | 51340794 | rs2659053   | A  | G   | 0.405 | 0.078 | (0.004) | 5.4E-94  | 0.035   | 2.3E-92  | 5.2E-03 | 0.031   | no  |
| 19q13.33 | 51349841 | rs113920094 | C  | T   | 0.007 | 0.144 | (0.025) | 6.5E-09  | 0.072   | 3.4E-08  | 0.076   | 0.98    | yes |
| 19q13.33 | 51360398 | rs374546878 | GA | G   | 0.762 | 0.165 | (0.023) | 1.7E-12  | 0.12    | -        | -       | -       | yes |
| 19q13.33 | 51361757 | rs17632542  | T  | C   | 0.924 | 0.368 | (0.007) | 3.2e-638 | 0.21    | 7.0e-641 | 2.8E-15 | 4.4E-09 | no  |

|          |           |             |     |   |       |       |         |         |         |         |         |         |     |
|----------|-----------|-------------|-----|---|-------|-------|---------|---------|---------|---------|---------|---------|-----|
| 19q13.33 | 51365466  | rs2735837   | G   | A | 0.871 | 0.098 | (0.006) | 7.2E-58 | 1.5E-12 | 6.7E-67 | 3.6E-12 | 0.51    | no  |
| 19q13.33 | 51373744  | rs12983994  | T   | C | 0.050 | 0.071 | (0.008) | 1.1E-17 | 1.3E-03 | 3.2E-19 | 2.0E-04 | 0.32    | no  |
| 19q13.33 | 51378275  | rs112103380 | C   | G | 0.008 | 0.212 | (0.024) | 1.7E-18 | 0.89    | 5.3E-16 | 0.88    | 0.38    | yes |
| 19q13.33 | 51383072  | rs198978    | G   | T | 0.642 | 0.044 | (0.004) | 8.4E-31 | 1.5E-03 | 5.1E-30 | 0.034   | 0.077   | yes |
| 19q13.41 | 51421334  | rs141135092 | C   | G | 0.976 | 0.091 | (0.015) | 1.2E-09 | 0.11    | 1.9E-09 | 0.025   | 0.43    | yes |
| 19q13.41 | 51441425  | rs80122351  | G   | T | 0.804 | 0.030 | (0.005) | 1.2E-10 | 0.37    | 5.2E-09 | 0.56    | 7.5E-03 | no  |
| 20q11.21 | 31950845  | rs291671    | G   | A | 0.114 | 0.053 | (0.006) | 1.2E-18 | 0.23    | 1.3E-16 | 0.31    | 3.1E-03 | yes |
| 21q22.2  | 40289167  | rs2836750   | T   | G | 0.401 | 0.027 | (0.004) | 1.6E-12 | 0.46    | 4.3E-11 | 0.22    | 0.97    | yes |
| 22q13.31 | 45996298  | rs13268     | A   | G | 0.976 | 0.080 | (0.013) | 1.6E-10 | 0.45    | 1.4E-08 | 0.69    | 0.43    | yes |
| Xp22.31  | 8912815   | rs112062538 | C   | T | 0.261 | 0.029 | (0.003) | 4.7E-19 | 0.57    | 5.8E-18 | 0.10    | 0.71    | yes |
| Xp22.2   | 16844831  | rs62586587  | G   | A | 0.614 | 0.031 | (0.003) | 3.6E-25 | 0.56    | 1.9E-23 | 0.054   | 0.027   | no  |
| Xp22.13  | 17831188  | rs200615037 | TTG | T | 0.950 | 0.066 | (0.007) | 3.5E-22 | 0.87    | 2.8E-20 | 0.34    | 0.021   | no  |
| Xp22.11  | 24109619  | rs7065158   | A   | G | 0.311 | 0.036 | (0.003) | 1.1E-29 | 0.080   | 1.6E-27 | 0.099   | 0.25    | no  |
| Xp11.22  | 51242364  | rs5987424   | A   | G | 0.384 | 0.017 | (0.003) | 2.1E-08 | 0.16    | 3.4E-07 | 0.15    | 0.41    | yes |
| Xp11.21  | 55936822  | rs10855058  | A   | G | 0.322 | 0.019 | (0.003) | 7.6E-09 | 0.054   | 2.5E-08 | 0.048   | 0.20    | yes |
| Xq13.1   | 68996186  | rs2520386   | G   | A | 0.735 | 0.023 | (0.003) | 4.2E-11 | 0.64    | 1.3E-09 | 0.18    | 0.50    | yes |
| Xq13.1   | 70125103  | rs62608084  | A   | G | 0.334 | 0.032 | (0.003) | 1.7E-24 | 0.43    | 4.8E-25 | 3.8E-03 | 0.089   | yes |
| Xq26.2   | 132935739 | rs4829762   | T   | C | 0.704 | 0.024 | (0.003) | 5.9E-12 | 0.59    | 3.7E-10 | 0.35    | 0.90    | yes |
| Xq26.3   | 133703924 | rs5930651   | T   | C | 0.665 | 0.017 | (0.003) | 1.0E-08 | 0.62    | 4.3E-07 | 0.43    | 0.99    | yes |

<sup>1</sup> Per allele change in log(PSA)

<sup>2</sup> Variants that were independent of previously reported PSA associations at LD  $r^2 < 0.01$  within  $\pm 10$  Mb were considered novel

Abbreviations:

EAF            Effect allele frequency

Note: MR-MEGA results are not available for variants that were present in too few studies

**Supplementary Table 4:** Population-specific effect estimates for the 128 genome-wide significant lead PSA variants identified in the multi-ancestry meta-analysis. For each variant associations are reported from the fixed effect meta-analysis conducted within each ancestry group.

| Region  | Position (b37) | Variant ID | Effect Allele | Other Allele                                          | EUR (N=85,824) |           |                    | AFR (N=3,509) |        |                    | HIS/LAT (N=3,098) |           |                    | EAS (N=3,337) |           |                    | New <sup>2</sup> |
|---------|----------------|------------|---------------|-------------------------------------------------------|----------------|-----------|--------------------|---------------|--------|--------------------|-------------------|-----------|--------------------|---------------|-----------|--------------------|------------------|
|         |                |            |               |                                                       | EAf            | $\beta^1$ | P <sub>METAL</sub> | EAf           | Effect | P <sub>METAL</sub> | EAf               | $\beta^1$ | P <sub>METAL</sub> | EAf           | $\beta^1$ | P <sub>METAL</sub> |                  |
| 1p32.3  | 51237409       | rs12569177 | C             | G                                                     | 0.431          | 0.027     | 2.78E-12           | 0.565         | 0.023  | 0.21               | 0.362             | 0.036     | 0.088              | 0.215         | 0.011     | 0.62               | yes              |
| 1p22.3  | 88199778       | rs12131120 | T             | A                                                     | 0.478          | 0.033     | 2.13E-18           | 0.862         | 0.018  | 0.50               | 0.565             | 0.025     | 0.24               | 0.923         | 0.089     | 0.011              | no               |
| 1p13.2  | 112264274      | rs2076591  | C             | T                                                     | 0.207          | 0.028     | 1.45E-09           | 0.398         | 0.050  | 8.07E-03           | 0.177             | 0.064     | 0.019              | 0.184         | 0.078     | 1.58E-03           | yes              |
| 1q21.3  | 154868055      | rs4845681  | T             | G                                                     | 0.393          | 0.023     | 1.84E-09           | 0.533         | 0.014  | 0.45               | 0.535             | -0.024    | 0.24               | 0.852         | 0.023     | 0.39               | yes              |
| 1q25.3  | 184191716      | rs12046452 | C             | T                                                     | 0.622          | 0.021     | 4.05E-08           | 0.797         | 0.026  | 0.26               | 0.639             | 0.030     | 0.17               | 0.503         | 0.013     | 0.50               | yes              |
| 1q32.1  | 205632217      | rs71152447 | G             | GGCCGACA<br>GCCCTTCT<br>GCTGGCTC<br>GGTGGGG<br>CCCAGC | 0.013          | 0.112     | 5.05E-03           | 0.010         | 0.071  | 0.65               | 0.051             | 0.228     | 3.42E-06           | 0.078         | 0.176     | 5.46E-06           | no               |
| 1q32.1  | 205636334      | rs4951018  | C             | A                                                     | 0.224          | 0.033     | 5.03E-13           | 0.132         | 0.007  | 0.82               | 0.321             | 0.036     | 0.099              | 0.340         | 0.008     | 0.70               | no               |
| 1q41    | 219694903      | rs12034581 | C             | A                                                     | 0.477          | 0.025     | 6.82E-11           | 0.821         | 0.013  | 0.60               | 0.622             | 0.005     | 0.80               | 0.655         | 0.073     | 2.49E-04           | yes              |
| 1q41    | 219954267      | rs6664688  | G             | A                                                     | 0.185          | 0.019     | 7.72E-05           | 0.393         | 0.041  | 0.028              | 0.277             | 0.073     | 1.36E-03           | 0.454         | 0.057     | 2.89E-03           | yes              |
| 2p24.2  | 18911674       | rs12710685 | G             | C                                                     | 0.098          | 0.037     | 6.92E-09           | 0.135         | 0.008  | 0.76               | 0.118             | -0.019    | 0.55               | 0.178         | 0.026     | 0.31               | yes              |
| 2p24.1  | 20880833       | rs10193919 | T             | C                                                     | 0.347          | 0.031     | 2.07E-14           | 0.118         | 0.010  | 0.73               | 0.327             | 0.043     | 0.047              | 0.437         | 0.029     | 0.13               | yes              |
| 2p23.3  | 25463871       | rs734693   | T             | C                                                     | 0.745          | 0.023     | 2.68E-07           | 0.504         | -0.015 | 0.42               | 0.691             | 0.059     | 8.65E-03           | 0.352         | 0.042     | 0.041              | yes              |
| 2p21    | 43072828       | rs1123695  | G             | C                                                     | 0.662          | 0.030     | 4.07E-14           | 0.824         | 0.031  | 0.19               | 0.725             | 0.048     | 0.036              | 0.442         | 0.043     | 0.026              | yes              |
| 2p21    | 43618819       | rs11899863 | C             | T                                                     | 0.900          | 0.044     | 6.10E-12           | 0.910         | 0.075  | 0.021              | 0.935             | 0.070     | 0.086              | 0.995         | -0.097    | 0.46               | yes              |
| 2p16.1  | 60759747       | rs2556375  | G             | T                                                     | 0.172          | 0.058     | 8.88E-30           | 0.172         | 0.058  | 0.020              | 0.221             | 0.080     | 1.36E-03           | 0.221         | 0.019     | 0.43               | no               |
| 2p15    | 63277843       | rs58235267 | G             | C                                                     | 0.476          | 0.029     | 6.68E-14           | 0.453         | -0.022 | 0.24               | 0.512             | -0.009    | 0.67               | 0.679         | 0.045     | 0.030              | yes              |
| 2p13.2  | 72059504       | rs11679946 | T             | C                                                     | 0.680          | 0.022     | 4.67E-08           | 0.764         | 0.024  | 0.28               | 0.718             | -0.021    | 0.37               | 0.431         | 0.040     | 0.039              | yes              |
| 2q33.1  | 198929083      | rs34388051 | A             | G                                                     | 0.679          | 0.021     | 3.04E-07           | 0.820         | 0.042  | 0.10               | 0.594             | 0.008     | 0.71               | 0.470         | 0.038     | 0.052              | yes              |
| 3q13.2  | 113290793      | rs4682495  | A             | C                                                     | 0.580          | 0.024     | 5.95E-10           | 0.571         | 0.012  | 0.52               | 0.612             | -0.024    | 0.24               | 0.339         | 0.008     | 0.69               | no               |
| 3q21.3  | 128067275      | rs11709611 | C             | T                                                     | 0.116          | 0.036     | 1.25E-09           | 0.192         | 0.036  | 0.12               | 0.109             | 0.042     | 0.19               | 0.011         | -0.013    | 0.90               | yes              |
| 3q23    | 141115219      | rs1582874  | C             | T                                                     | 0.440          | 0.031     | 2.00E-16           | 0.796         | 0.042  | 0.063              | 0.405             | 0.013     | 0.52               | 0.233         | -0.003    | 0.90               | no               |
| 3q25.33 | 160130592      | rs10673842 | TTATC         | T                                                     | 0.530          | 0.025     | 2.41E-08           | 0.579         | -0.019 | 0.37               | 0.460             | 0.048     | 0.028              | 0.271         | 0.001     | 0.97               | yes              |



|         |           |                 |    |   |       |       |          |       |        |          |       |        |          |       |        |          |     |
|---------|-----------|-----------------|----|---|-------|-------|----------|-------|--------|----------|-------|--------|----------|-------|--------|----------|-----|
| 3q27.2  | 185246981 | rs4012714       | A  | G | 0.574 | 0.028 | 8.53E-10 | 0.560 | -0.018 | 0.43     | 0.589 | 0.016  | 0.51     | 0.730 | -0.009 | 0.73     | yes |
| 3q27.3  | 186746994 | rs12629450      | C  | G | 0.169 | 0.032 | 3.92E-10 | 0.139 | 0.020  | 0.48     | 0.185 | 0.034  | 0.23     | 0.231 | 0.003  | 0.91     | yes |
| 3q28    | 189482770 | rs6765473       | T  | C | 0.881 | 0.034 | 9.06E-09 | 0.967 | 0.117  | 0.040    | 0.845 | 0.070  | 0.017    | 0.986 | 0.086  | 0.45     | yes |
| 4p15.2  | 24410024  | rs4276269       | G  | A | 0.265 | 0.023 | 8.32E-08 | 0.255 | 0.010  | 0.65     | 0.255 | 0.031  | 0.19     | 0.222 | 0.028  | 0.22     | yes |
| 4q31.22 | 146890261 | rs9968429       | G  | A | 0.361 | 0.030 | 2.25E-14 | 0.438 | 0.078  | 2.49E-05 | 0.358 | 0.014  | 0.51     | 0.506 | 0.039  | 0.037    | no  |
| 4q32.1  | 157497921 | rs13115840      | A  | G | 0.355 | 0.031 | 3.01E-15 | 0.172 | 0.051  | 0.040    | 0.363 | 0.013  | 0.54     | 0.457 | 0.035  | 0.063    | no  |
| 5p15.33 | 1285974   | rs7705526       | A  | C | 0.334 | 0.024 | 5.30E-08 | 0.200 | -0.008 | 0.74     | 0.309 | 0.023  | 0.30     | 0.386 | 0.045  | 0.052    | no  |
| 5p15.33 | 1322087   | rs401681        | C  | T | 0.562 | 0.059 | 2.19E-49 | 0.417 | 0.078  | 2.35E-05 | 0.581 | 0.053  | 9.58E-03 | 0.672 | 0.033  | 0.13     | no  |
| 5q14.3  | 92052005  | rs7732515       | A  | T | 0.224 | 0.034 | 2.45E-13 | 0.331 | 0.045  | 0.023    | 0.184 | 0.004  | 0.89     | 0.020 | 0.099  | 0.23     | yes |
| 5q35.2  | 172945918 | rs889017        | C  | A | 0.213 | 0.022 | 1.59E-06 | 0.550 | 0.020  | 0.28     | 0.189 | 0.029  | 0.27     | 0.162 | 0.091  | 5.38E-04 | yes |
| 6p22.3  | 15463139  | rs926309        | T  | G | 0.385 | 0.027 | 4.98E-12 | 0.275 | 0.037  | 0.080    | 0.290 | 0.012  | 0.60     | 0.187 | 0.014  | 0.56     | yes |
| 6p22.3  | 16515154  | rs236961        | T  | C | 0.347 | 0.028 | 5.18E-12 | 0.415 | -0.020 | 0.29     | 0.442 | 0.025  | 0.23     | 0.367 | 0.035  | 0.079    | yes |
| 6p22.1  | 29915061  | rs2248162       | C  | T | 0.659 | 0.025 | 1.14E-09 | 0.700 | 0.022  | 0.27     | 0.782 | 0.042  | 0.092    | 0.956 | -0.061 | 0.19     | yes |
| 6p21.31 | 34212537  | rs551980123     | TG | T | 0.044 | 0.067 | 8.96E-10 | 0.023 | 0.017  | 0.81     | 0.019 | 0.240  | 2.96E-03 | 0.015 | 0.004  | 0.97     | yes |
| 6p21.1  | 43711981  | rs1535507       | T  | C | 0.156 | 0.051 | 6.93E-22 | 0.067 | -0.016 | 0.66     | 0.155 | -0.005 | 0.85     | 0.325 | 0.059  | 4.24E-03 | no  |
| 6q22.33 | 129168057 | rs73583119      | A  | T | 6E-04 | -     | -        | 0.926 | 0.181  | 3.98E-07 | 0.995 | 0.452  | 7.66E-03 | 1E-04 | -      | -        | yes |
| 7p15.3  | 20909622  | rs204592        | G  | A | 0.532 | 0.020 | 1.47E-07 | 0.269 | 0.027  | 0.19     | 0.493 | 0.041  | 0.041    | 0.350 | 0.056  | 4.82E-03 | yes |
| 7p15.3  | 21839896  | rs6956349       | T  | C | 0.438 | 0.021 | 4.41E-08 | 0.117 | 0.018  | 0.53     | 0.298 | 0.029  | 0.18     | 0.027 | 0.077  | 0.18     | yes |
| 7p15.2  | 27281792  | rs17437810      | A  | G | 0.021 | 0.077 | 1.21E-08 | 0.006 | 0.045  | 0.80     | 0.015 | 0.086  | 0.33     | NA    | NA     | NA       | yes |
| 7p15.2  | 27483166  | rs10250340      | A  | G | 0.323 | 0.024 | 3.00E-09 | 0.353 | 0.053  | 6.51E-03 | 0.284 | -0.011 | 0.63     | 0.277 | -0.017 | 0.44     | yes |
| 7p15.2  | 27975919  | rs67152137      | G  | C | 0.764 | 0.049 | 2.56E-28 | 0.707 | 0.011  | 0.60     | 0.601 | 0.051  | 0.012    | 0.154 | 0.063  | 0.017    | no  |
| 8p21.2  | 23437981  | rs2928681       | C  | A | 0.418 | 0.033 | 4.82E-18 | 0.443 | -0.009 | 0.64     | 0.338 | 0.012  | 0.59     | 0.282 | 0.048  | 0.024    | no  |
| 8p21.2  | 23529521  | rs1160267       | G  | A | 0.424 | 0.069 | 2.53E-72 | 0.696 | 0.085  | 2.55E-05 | 0.448 | 0.070  | 9.02E-04 | 0.315 | 0.073  | 4.22E-04 | no  |
| 8q12.1  | 57138676  | rs36112366      | T  | G | 0.884 | 0.038 | 2.64E-10 | 0.971 | 0.028  | 0.61     | 0.894 | 0.058  | 0.080    | 0.914 | 0.005  | 0.89     | yes |
| 8q12.1  | 57834357  | rs4738555       | C  | T | 0.445 | 0.032 | 1.28E-16 | 0.325 | 0.045  | 0.023    | 0.401 | 0.021  | 0.31     | 0.223 | -0.013 | 0.56     | no  |
| 8q21.13 | 81811566  | 8:81811566_CA_C | CA | C | 0.588 | 0.022 | 2.25E-08 | 0.732 | 0.059  | 4.97E-03 | 0.468 | 0.015  | 0.45     | 0.619 | 0.053  | 6.25E-03 | yes |
| 8q23.1  | 108849527 | rs1494920       | T  | C | 0.619 | 0.019 | 1.02E-06 | 0.513 | 0.035  | 0.059    | 0.569 | 0.027  | 0.20     | 0.372 | 0.024  | 0.23     | yes |
| 8q24.21 | 127817460 | rs7843726       | G  | C | 0.139 | 0.031 | 2.98E-08 | 0.036 | -0.097 | 0.074    | 0.126 | 0.063  | 0.047    | 0.261 | 0.015  | 0.50     | yes |

|          |           |             |   |     |       |       |          |       |        |          |       |        |          |       |        |          |     |
|----------|-----------|-------------|---|-----|-------|-------|----------|-------|--------|----------|-------|--------|----------|-------|--------|----------|-----|
| 8q24.21  | 128093297 | rs1016343   | T | C   | 0.201 | 0.035 | 4.99E-14 | 0.215 | 0.047  | 0.036    | 0.155 | 0.004  | 0.89     | 0.289 | 0.032  | 0.12     | yes |
| 8q24.21  | 128318755 | rs10107982  | T | C   | 0.720 | 0.046 | 5.80E-28 | 0.874 | 0.055  | 0.049    | 0.790 | 0.031  | 0.22     | 0.908 | 0.066  | 0.048    | no  |
| 8q24.21  | 128413305 | rs6983267   | G | T   | 0.508 | 0.052 | 1.49E-42 | 0.865 | 0.037  | 0.17     | 0.569 | 0.071  | 5.77E-04 | 0.384 | 0.030  | 0.12     | no  |
| 9q22.32  | 99146751  | rs7020681   | C | T   | 0.196 | 0.032 | 1.93E-11 | 0.543 | -0.026 | 0.17     | 0.166 | 0.002  | 0.95     | 0.041 | -0.050 | 0.30     | yes |
| 9q33.1   | 118258080 | rs150402584 | T | TG  | 0.100 | 0.037 | 3.91E-09 | 0.163 | 0.003  | 0.90     | 0.133 | -0.014 | 0.63     | 0.381 | 0.054  | 5.67E-03 | yes |
| 9q33.1   | 120475302 | rs4986790   | A | G   | 0.942 | 0.068 | 4.77E-17 | 0.925 | 0.015  | 0.66     | 0.958 | 0.053  | 0.29     | 0.992 | 0.110  | 0.37     | no  |
| 9q33.2   | 123643426 | rs59482735  | T | TAA | 0.326 | 0.029 | 1.86E-09 | 0.250 | 0.038  | 0.14     | 0.296 | 0.073  | 2.22E-03 | 0.263 | 0.057  | 0.026    | no  |
| 10p12.31 | 22363979  | rs3011633   | C | T   | 0.224 | 0.041 | 1.81E-19 | 0.061 | 0.018  | 0.65     | 0.212 | 0.016  | 0.52     | 0.198 | 0.033  | 0.18     | no  |
| 10p12.2  | 23398448  | rs1857279   | C | G   | 0.672 | 0.024 | 1.70E-09 | 0.708 | 0.028  | 0.18     | 0.639 | 0.041  | 0.054    | 0.393 | 0.026  | 0.18     | yes |
| 10p12.1  | 28096754  | rs2815506   | A | G   | 0.823 | 0.036 | 2.13E-13 | 0.718 | 0.059  | 3.78E-03 | 0.810 | 0.021  | 0.43     | 0.596 | 0.023  | 0.24     | no  |
| 10q11.23 | 51549496  | rs10993994  | T | C   | 0.391 | 0.085 | 2.66E-76 | 0.600 | 0.065  | 3.12E-03 | 0.377 | 0.077  | 6.52E-04 | 0.493 | 0.132  | 6.74E-09 | no  |
| 10q25.2  | 111991733 | rs562417881 | G | GT  | 0.856 | 0.038 | 3.19E-09 | 0.934 | 0.082  | 0.094    | 0.712 | -0.004 | 0.87     | 0.706 | 0.013  | 0.61     | yes |
| 10q26.12 | 122631067 | rs9325569   | A | G   | 0.339 | 0.053 | 4.42E-40 | 0.147 | 0.014  | 0.59     | 0.420 | 0.040  | 0.049    | 0.413 | 0.038  | 0.051    | no  |
| 10q26.12 | 123049264 | rs10886902  | C | T   | 0.231 | 0.099 | 6.5E-110 | 0.064 | 0.100  | 9.36E-03 | 0.247 | 0.087  | 2.33E-04 | 0.264 | 0.109  | 6.06E-07 | no  |
| 10q26.13 | 123135200 | rs10788173  | C | T   | 0.397 | 0.023 | 9.00E-09 | 0.580 | 0.017  | 0.43     | 0.407 | 0.003  | 0.88     | 0.391 | -0.015 | 0.47     | yes |
| 10q26.13 | 123185303 | rs10749415  | A | G   | 0.944 | 0.104 | 2.93E-34 | 0.789 | 0.130  | 1.02E-08 | 0.850 | 0.115  | 6.13E-05 | 0.969 | 0.130  | 0.049    | no  |
| 10q26.13 | 123349324 | rs45631563  | T | A   | 0.046 | 0.089 | 2.66E-22 | 0.013 | 0.120  | 0.20     | 0.042 | 0.022  | 0.68     | 0.009 | 0.293  | 0.038    | no  |
| 10q26.13 | 126737579 | rs3012065   | C | T   | 0.321 | 0.022 | 1.28E-07 | 0.331 | 0.024  | 0.24     | 0.319 | 0.004  | 0.85     | 0.262 | 0.041  | 0.066    | yes |
| 11p15.5  | 197557    | rs7103852   | G | A   | 0.914 | 0.041 | 2.10E-08 | 0.597 | 0.043  | 0.029    | 0.912 | 0.022  | 0.56     | 0.959 | 0.093  | 0.22     | yes |
| 11p13    | 34718279  | rs553481604 | G | GT  | 0.703 | 0.030 | 1.27E-09 | 0.741 | 0.032  | 0.20     | 0.626 | 0.061  | 7.30E-03 | 0.612 | 0.022  | 0.35     | no  |
| 11p13    | 34780936  | rs10466455  | C | T   | 0.400 | 0.040 | 9.24E-26 | 0.387 | 0.004  | 0.84     | 0.305 | 0.024  | 0.27     | 0.380 | 0.023  | 0.24     | no  |
| 11q13.5  | 76153279  | rs58015965  | G | A   | 0.679 | 0.021 | 1.18E-07 | 0.785 | 0.011  | 0.61     | 0.771 | 0.036  | 0.15     | 0.871 | 0.005  | 0.85     | yes |
| 11q22.2  | 102396607 | rs12285347  | C | T   | 0.455 | 0.039 | 6.15E-25 | 0.552 | -0.002 | 0.90     | 0.373 | 0.050  | 0.016    | 0.095 | 0.053  | 0.12     | no  |
| 11q22.2  | 102438778 | rs7129424   | A | G   | 0.547 | 0.023 | 3.16E-09 | 0.735 | 0.031  | 0.13     | 0.560 | 0.050  | 0.015    | 0.779 | 0.046  | 0.043    | yes |
| 12p13.31 | 9222286   | rs1805664   | T | C   | 0.341 | 0.020 | 9.17E-07 | 0.202 | 0.044  | 0.056    | 0.340 | 0.057  | 7.18E-03 | 0.089 | 0.067  | 0.047    | yes |
| 12q14.3  | 66393756  | rs74097857  | T | C   | 0.870 | 0.033 | 3.59E-09 | 0.957 | 0.065  | 0.16     | 0.912 | 0.012  | 0.74     | 0.995 | 0.126  | 0.41     | yes |
| 12q21.31 | 84994000  | rs61928422  | T | C   | 0.166 | 0.027 | 1.50E-07 | 0.203 | 0.005  | 0.84     | 0.224 | 0.006  | 0.80     | 0.151 | 0.100  | 1.76E-04 | yes |
| 12q24.21 | 115099805 | rs10774760  | G | A   | 0.498 | 0.042 | 1.50E-27 | 0.811 | 0.034  | 0.15     | 0.477 | 0.039  | 0.057    | 0.462 | 0.047  | 0.017    | no  |
| 12q24.21 | 115155460 | rs11067251  | G | T   | 0.573 | 0.022 | 6.83E-09 | 0.816 | -0.019 | 0.43     | 0.565 | 0.019  | 0.37     | 0.864 | 0.074  | 8.65E-03 | yes |

|          |           |             |    |     |       |       |          |       |        |          |       |        |          |       |        |          |     |
|----------|-----------|-------------|----|-----|-------|-------|----------|-------|--------|----------|-------|--------|----------|-------|--------|----------|-----|
| 12q24.23 | 118855432 | rs1045542   | G  | A   | 0.907 | 0.049 | 7.35E-14 | 0.981 | -0.003 | 0.97     | 0.887 | 0.023  | 0.48     | 0.991 | -0.027 | 0.85     | yes |
| 13q14.3  | 51087443  | rs202346    | A  | C   | 0.254 | 0.042 | 2.07E-22 | 0.296 | 0.070  | 4.36E-04 | 0.233 | 0.051  | 0.033    | 0.146 | 0.073  | 6.78E-03 | no  |
| 13q14.3  | 51165912  | rs12869529  | A  | G   | 0.961 | 0.065 | 5.11E-11 | 0.944 | 0.079  | 0.053    | 0.953 | 0.032  | 0.51     | 0.998 | -0.110 | 0.67     | yes |
| 13q14.3  | 51445360  | rs9563006   | A  | G   | 0.443 | 0.024 | 2.58E-10 | 0.506 | 0.012  | 0.53     | 0.436 | 0.027  | 0.19     | 0.054 | 0.054  | 0.21     | no  |
| 13q22.1  | 74055303  | rs1361057   | C  | T   | 0.254 | 0.022 | 6.42E-07 | 0.225 | 0.029  | 0.20     | 0.249 | -0.003 | 0.89     | 0.430 | 0.052  | 6.87E-03 | yes |
| 13q32.1  | 95799006  | rs61965887  | A  | G   | 0.063 | 0.060 | 1.94E-14 | 0.016 | 0.010  | 0.90     | 0.035 | 0.035  | 0.53     | 0.004 | -0.114 | 0.58     | yes |
| 14q13.3  | 37240591  | rs712329    | G  | A   | 0.444 | 0.020 | 1.69E-07 | 0.324 | 0.010  | 0.60     | 0.329 | 0.002  | 0.92     | 0.138 | 0.101  | 4.41E-04 | yes |
| 14q32.13 | 94838142  | rs112635299 | G  | T   | 0.979 | 0.103 | 7.78E-15 | 0.997 | 0.423  | 0.076    | 0.990 | 0.211  | 0.056    | 8E-04 | -      | -        | yes |
| 14q32.13 | 95104745  | rs72695000  | C  | T   | 0.821 | 0.054 | 4.10E-27 | 0.943 | 0.030  | 0.46     | 0.887 | 0.067  | 0.033    | 0.982 | -0.011 | 0.89     | no  |
| 15q22.31 | 66941399  | rs8038722   | G  | A   | 0.502 | 0.019 | 3.55E-07 | 0.337 | 0.016  | 0.42     | 0.465 | 0.044  | 0.032    | 0.632 | 0.017  | 0.39     | yes |
| 16p13.3  | 4318206   | rs251739    | G  | A   | 0.506 | 0.033 | 2.67E-17 | 0.358 | 0.048  | 0.013    | 0.488 | 0.063  | 1.86E-03 | 0.719 | -0.006 | 0.81     | no  |
| 16p13.13 | 11201428  | rs9933507   | C  | T   | 0.431 | 0.022 | 6.58E-09 | 0.519 | 0.026  | 0.16     | 0.374 | 0.015  | 0.46     | 0.344 | 0.039  | 0.052    | yes |
| 16q23.1  | 77507275  | rs7206309   | C  | T   | 0.286 | 0.041 | 5.52E-22 | 0.445 | 0.018  | 0.35     | 0.480 | 0.034  | 0.093    | 0.761 | 0.021  | 0.36     | no  |
| 16q24.1  | 86554784  | rs13334022  | T  | C   | 0.089 | 0.039 | 1.04E-08 | 0.307 | 0.076  | 2.11E-04 | 0.097 | 0.043  | 0.20     | 0.048 | -0.031 | 0.54     | yes |
| 17p13.3  | 1994071   | rs3760230   | C  | G   | 0.423 | 0.020 | 3.79E-07 | 0.518 | 0.021  | 0.27     | 0.363 | 0.012  | 0.56     | 0.725 | 0.047  | 0.030    | yes |
| 17p13.1  | 7571752   | rs78378222  | G  | T   | 0.012 | 0.112 | 4.08E-10 | 0.001 | -      | -        | 0.004 | 0.133  | 0.44     | 8E-04 | -      | -        | yes |
| 17p13.1  | 7793367   | rs34009884  | C  | CTG | 0.106 | 0.038 | 1.49E-09 | 0.025 | -0.056 | 0.37     | 0.057 | -0.029 | 0.52     | 0.011 | -0.035 | 0.79     | yes |
| 17p12    | 12320741  | rs7219536   | T  | C   | 0.509 | 0.024 | 3.05E-10 | 0.262 | 0.048  | 0.023    | 0.461 | 0.055  | 7.92E-03 | 0.094 | -0.006 | 0.84     | yes |
| 17p12    | 12556260  | rs9889266   | C  | A   | 0.590 | 0.024 | 8.26E-10 | 0.489 | 0.027  | 0.14     | 0.430 | 0.011  | 0.61     | 0.381 | 0.000  | 0.98     | yes |
| 17q12    | 36099952  | rs10908278  | A  | T   | 0.513 | 0.051 | 9.85E-42 | 0.688 | 0.008  | 0.71     | 0.552 | 0.102  | 8.41E-07 | 0.713 | 0.058  | 6.32E-03 | no  |
| 18q23    | 76777252  | rs71279357  | A  | T   | 0.729 | 0.035 | 1.31E-11 | 0.769 | 0.012  | 0.64     | 0.733 | 0.047  | 0.062    | 0.602 | 0.031  | 0.20     | yes |
| 19q12    | 32055024  | rs11084590  | C  | T   | 0.682 | 0.036 | 6.87E-19 | 0.894 | -0.013 | 0.68     | 0.775 | 0.020  | 0.41     | 0.926 | 0.020  | 0.60     | no  |
| 19q13.32 | 46229711  | rs6509234   | G  | T   | 0.817 | 0.029 | 1.18E-08 | 0.940 | 0.056  | 0.18     | 0.866 | 0.060  | 0.047    | 0.897 | -0.050 | 0.13     | yes |
| 19q13.33 | 49206462  | rs681343    | T  | C   | 0.488 | 0.019 | 5.94E-07 | 0.489 | 0.036  | 0.051    | 0.380 | 0.033  | 0.11     | 0.024 | -0.008 | 0.90     | yes |
| 19q13.33 | 51225544  | rs890863    | G  | A   | 0.663 | 0.023 | 3.92E-08 | 0.879 | 0.062  | 0.043    | 0.632 | 0.001  | 0.96     | 0.389 | 0.026  | 0.22     | yes |
| 19q13.33 | 51323501  | rs1054713   | A  | G   | 0.330 | 0.040 | 1.38E-22 | 0.256 | 0.003  | 0.90     | 0.275 | 0.070  | 2.37E-03 | 0.226 | -0.046 | 0.050    | no  |
| 19q13.33 | 51340794  | rs2659053   | A  | G   | 0.391 | 0.082 | 4.35E-92 | 0.449 | 0.042  | 0.026    | 0.547 | 0.049  | 0.018    | 0.615 | 0.046  | 0.049    | no  |
| 19q13.33 | 51349841  | rs113920094 | C  | T   | 0.007 | 0.144 | 1.28E-08 | 0.002 | 1.008  | 0.011    | 0.009 | 0.038  | 0.79     | 0.001 | -      | -        | yes |
| 19q13.33 | 51360398  | rs374546878 | GA | G   | 0.999 | 0.150 | 0.17     | 0.988 | -0.089 | 0.42     | 0.992 | 0.215  | 0.082    | 0.728 | 0.177  | 1.58E-12 | yes |

|          |           |             |     |   |       |       |          |       |        |          |       |        |          |       |        |          |     |
|----------|-----------|-------------|-----|---|-------|-------|----------|-------|--------|----------|-------|--------|----------|-------|--------|----------|-----|
| 19q13.33 | 51361757  | rs17632542  | T   | C | 0.923 | 0.366 | 1.1E-605 | 0.982 | 0.341  | 3.30E-06 | 0.954 | 0.463  | 3.83E-22 | 0.994 | 0.267  | 0.083    | no  |
| 19q13.33 | 51365466  | rs2735837   | G   | A | 0.915 | 0.080 | 5.26E-31 | 0.830 | 0.074  | 3.20E-03 | 0.827 | 0.158  | 3.13E-09 | 0.579 | 0.227  | 4.73E-32 | no  |
| 19q13.33 | 51373744  | rs12983994  | T   | C | 0.048 | 0.069 | 6.53E-15 | 0.071 | 0.015  | 0.68     | 0.046 | 0.030  | 0.54     | 0.056 | 0.216  | 1.39E-07 | no  |
| 19q13.33 | 51378275  | rs112103380 | C   | G | 0.008 | 0.210 | 7.27E-18 | 0.002 | 0.244  | 0.49     | 0.005 | 0.299  | 0.10     | 7E-04 | -      | -        | yes |
| 19q13.33 | 51383072  | rs198978    | G   | T | 0.650 | 0.040 | 1.01E-23 | 0.362 | 0.045  | 0.020    | 0.646 | 0.108  | 4.47E-07 | 0.759 | 0.095  | 1.64E-05 | yes |
| 19q13.41 | 51421334  | rs141135092 | C   | G | 0.976 | 0.091 | 1.67E-09 | 0.995 | -0.341 | 0.092    | 0.984 | 0.211  | 0.042    | 0.996 | -0.013 | 0.95     | yes |
| 19q13.41 | 51441425  | rs80122351  | G   | T | 0.800 | 0.031 | 6.08E-11 | 0.938 | 0.016  | 0.70     | 0.863 | -0.002 | 0.95     | 0.989 | 0.194  | 0.11     | no  |
| 20q11.21 | 31950845  | rs291671    | G   | A | 0.100 | 0.049 | 4.46E-14 | 0.048 | 0.093  | 0.028    | 0.077 | 0.046  | 0.23     | 0.299 | 0.089  | 2.04E-05 | yes |
| 21q22.2  | 40289167  | rs2836750   | T   | G | 0.380 | 0.026 | 1.51E-10 | 0.524 | 0.053  | 5.27E-03 | 0.548 | 0.018  | 0.40     | 0.774 | 0.041  | 0.080    | yes |
| 22q13.31 | 45996298  | rs13268     | A   | G | 0.975 | 0.078 | 8.33E-10 | 0.992 | 0.173  | 0.13     | 0.986 | 0.158  | 0.099    | 0.999 | -0.368 | 0.35     | yes |
| Xp22.31  | 8912815   | rs112062538 | C   | T | 0.263 | 0.028 | 4.40E-17 | 0.271 | 0.034  | 0.041    | 0.185 | 0.052  | 7.38E-03 | 0.247 | 0.017  | 0.34     | yes |
| Xp22.2   | 16844831  | rs62586587  | G   | A | 0.631 | 0.030 | 5.80E-21 | 0.544 | 0.051  | 7.33E-04 | 0.470 | 0.033  | 0.041    | 0.252 | 0.037  | 0.067    | no  |
| Xp22.13  | 17831188  | rs200615037 | TTG | T | 0.954 | 0.068 | 3.69E-21 | 0.897 | 0.055  | 0.027    | 0.960 | 0.039  | 0.33     | 0.989 | 0.074  | 0.62     | no  |
| Xp22.11  | 24109619  | rs7065158   | A   | G | 0.318 | 0.037 | 6.75E-28 | 0.138 | 0.040  | 0.15     | 0.250 | 0.003  | 0.85     | 0.150 | 0.086  | 1.32E-03 | no  |
| Xp11.22  | 51242364  | rs5987424   | A   | G | 0.394 | 0.018 | 5.99E-09 | 0.287 | 0.010  | 0.54     | 0.267 | -0.009 | 0.62     | 0.132 | -0.029 | 0.30     | yes |
| Xp11.21  | 55936822  | rs10855058  | A   | G | 0.317 | 0.017 | 7.13E-07 | 0.310 | 0.061  | 3.17E-04 | 0.448 | 0.028  | 0.071    | 0.304 | 0.004  | 0.83     | yes |
| Xq13.1   | 68996186  | rs2520386   | G   | A | 0.730 | 0.022 | 8.09E-10 | 0.911 | 0.048  | 0.20     | 0.820 | 0.037  | 0.069    | 0.979 | 0.067  | 0.22     | yes |
| Xq13.1   | 70125103  | rs62608084  | A   | G | 0.342 | 0.033 | 4.91E-25 | 0.195 | 0.017  | 0.35     | 0.212 | 0.009  | 0.64     | 0.019 | 0.076  | 0.20     | yes |
| Xq26.2   | 132935739 | rs4829762   | T   | C | 0.725 | 0.025 | 1.63E-11 | 0.522 | 0.026  | 0.092    | 0.795 | 0.007  | 0.73     | 0.462 | 0.008  | 0.58     | yes |
| Xq26.3   | 133703924 | rs5930651   | T   | C | 0.679 | 0.018 | 3.97E-08 | 0.292 | -0.004 | 0.84     | 0.610 | 0.017  | 0.31     | 0.653 | 0.028  | 0.087    | yes |

<sup>1</sup> Per allele change in log(PSA)

<sup>2</sup> Variants that were independent of previously reported PSA associations at LD  $r^2 < 0.01$  within  $\pm 10$  Mb were considered novel

Abbreviations:

EAF          Effect allele frequency

**Supplementary Table 5:** Genome-wide significant variants associated with PSA levels in the multi-ancestry meta-regression analysis using MR-MEGA. A total of 119 lead variants were identified using LD-based clumping at  $r^2 < 0.01$  within  $\pm 10$ Mb windows.

| Region  | Position (b37) | Variant ID  | Effect Allele                                     | Other Allele | Meta-Regression (MR-MEGA) |                   |                      |                      |       |                    |              | Meta-analysis |
|---------|----------------|-------------|---------------------------------------------------|--------------|---------------------------|-------------------|----------------------|----------------------|-------|--------------------|--------------|---------------|
|         |                |             |                                                   |              | EAF <sub>MEGA</sub>       | P <sub>MEGA</sub> | P <sub>Het-Anc</sub> | P <sub>Het-Res</sub> | N     | N <sub>study</sub> | Direction    |               |
| 1p32.3  | 51021867       | rs147696085 | A                                                 | G            | 0.088                     | 2.62E-09          | 0.51                 | 0.16                 | 95768 | 12                 | +++ ++++++   | 1.75E-11      |
| 1p32.3  | 51480258       | rs7555006   | G                                                 | A            | 0.439                     | 7.11E-11          | 0.25                 | 0.68                 | 95768 | 12                 | ++++-+++++   | 6.64E-13      |
| 1p22.3  | 88182718       | rs10493801  | G                                                 | A            | 0.511                     | 4.41E-20          | 0.016                | 0.16                 | 69277 | 11                 | +---?-+--+   | 6.11E-21      |
| 1p13.2  | 112264274      | rs2076591   | C                                                 | T            | 0.212                     | 1.86E-11          | 0.18                 | 0.70                 | 95768 | 12                 | +++++++<br>+ | 2.64E-13      |
| 1q32.1  | 205632217      | rs71152447  | GGCCGACAGC<br>CCTTCTGCTG<br>GCTCGGTGGG<br>GCCCAGC | G            | 0.980                     | 4.24E-10          | 0.19                 | 0.11                 | 44597 | 8                  | ?-?-?+?----  | 9.91E-12      |
| 1q32.1  | 205636334      | rs4951018   | C                                                 | A            | 0.227                     | 7.05E-12          | 0.081                | 0.077                | 95768 | 12                 | ++++-+++++   | 2.75E-13      |
| 1q41    | 219694903      | rs12034581  | A                                                 | C            | 0.500                     | 1.38E-10          | 0.24                 | 0.39                 | 95768 | 12                 | +-----+---   | 2.46E-12      |
| 2p24.1  | 20878153       | rs9306895   | C                                                 | T            | 0.353                     | 4.15E-13          | 0.67                 | 0.32                 | 95768 | 12                 | ++++-+++++   | 1.79E-15      |
| 2p23.3  | 25463871       | rs734693    | T                                                 | C            | 0.720                     | 4.72E-08          | 0.018                | 0.66                 | 95768 | 12                 | ++++-+++++   | 3.88E-08      |
| 2p21    | 43072828       | rs1123695   | C                                                 | G            | 0.338                     | 2.87E-13          | 0.95                 | 0.73                 | 95768 | 12                 | -----+--     | 3.25E-16      |
| 2p21    | 43618819       | rs11899863  | T                                                 | C            | 0.095                     | 8.79E-11          | 0.71                 | 0.050                | 95768 | 12                 | +-----++     | 1.72E-13      |
| 2p16.1  | 60759747       | rs2556375   | T                                                 | G            | 0.825                     | 1.67E-29          | 0.47                 | 0.45                 | 95768 | 12                 | -----+--     | 1.75E-32      |
| 2p16.1  | 60790985       | rs1510478   | A                                                 | G            | 0.161                     | 2.82E-13          | 0.22                 | 0.47                 | 95768 | 12                 | +-----+---   | 2.22E-15      |
| 2p15    | 63277843       | rs58235267  | G                                                 | C            | 0.483                     | 2.88E-12          | 0.024                | 0.56                 | 95768 | 12                 | -++++-+++++  | 4.92E-13      |
| 3q23    | 141115219      | rs1582874   | C                                                 | T            | 0.444                     | 5.11E-14          | 0.53                 | 0.70                 | 95768 | 12                 | +++++++--+   | 1.01E-16      |
| 3q27.3  | 186763665      | rs59663889  | A                                                 | T            | 0.194                     | 4.31E-08          | 0.45                 | 0.19                 | 95768 | 12                 | +++++++--+   | 4.50E-10      |
| 3q28    | 189482770      | rs6765473   | C                                                 | T            | 0.114                     | 1.26E-08          | 0.25                 | 0.78                 | 94949 | 11                 | +-----?      | 3.25E-10      |
| 3q28    | 191387768      | rs114388981 | T                                                 | A            | 0.983                     | 4.40E-08          | 1.29E-08             | 0.14                 | 38447 | 8                  | ?+??+--+     | 0.78          |
| 4q31.22 | 146890261      | rs9968429   | G                                                 | A            | 0.369                     | 2.12E-16          | 0.053                | 0.34                 | 95768 | 12                 | +++++++--+   | 6.34E-18      |
| 4q32.1  | 157491375      | rs17034927  | T                                                 | C            | 0.356                     | 8.03E-14          | 0.96                 | 0.46                 | 95768 | 12                 | +++++++<br>+ | 1.22E-16      |
| 5p15.33 | 1287194        | rs2853677   | A                                                 | G            | 0.584                     | 2.29E-22          | 0.56                 | 0.87                 | 95768 | 12                 | -----+---    | 7.91E-25      |
| 5p15.33 | 1322087        | rs401681    | T                                                 | C            | 0.437                     | 1.17E-51          | 0.20                 | 0.78                 | 95768 | 12                 | -----        | 6.98E-54      |

|          |           |                     |   |    |       |          |          |       |       |    |                 |          |
|----------|-----------|---------------------|---|----|-------|----------|----------|-------|-------|----|-----------------|----------|
| 5p15.33  | 1366007   | rs152133            | A | G  | 0.368 | 1.21E-12 | 0.19     | 0.65  | 95768 | 12 | +++++--++++     | 8.33E-15 |
| 5q14.3   | 92052005  | rs7732515           | A | T  | 0.221 | 7.56E-12 | 0.56     | 0.62  | 94949 | 11 | +++++++--+??    | 3.53E-14 |
| 5q15     | 96727294  | rs291812            | T | C  | 0.468 | 1.00E-08 | 2.24E-04 | 0.99  | 95768 | 12 | +++++---++++    | 9.30E-07 |
| 6p22.3   | 15230743  | rs112266013         | A | G  | 0.132 | 4.90E-10 | 6.20E-04 | 0.88  | 95768 | 12 | -----           | 9.85E-09 |
| 6p22.3   | 16515154  | rs236961            | T | C  | 0.353 | 1.84E-10 | 0.12     | 0.43  | 95768 | 12 | +++++--+++++    | 8.57E-12 |
| 6p22.1   | 29915061  | rs2248162           | C | T  | 0.675 | 2.08E-08 | 0.26     | 0.36  | 95768 | 12 | -++++++--++     | 3.60E-10 |
| 6p21.31  | 34237109  | rs575339229         | C | G  | 0.976 | 1.64E-09 | 0.040    | 0.57  | 69887 | 7  | ?-?---?-?-?     | 2.79E-10 |
| 6p21.1   | 43710348  | rs6920449           | C | T  | 0.839 | 1.63E-22 | 1.29E-03 | 0.054 | 95768 | 12 | -----++++-      | 8.05E-22 |
| 7p15.3   | 20909622  | rs204592            | G | A  | 0.515 | 3.82E-08 | 0.22     | 0.47  | 95768 | 12 | +++++++--+++++  | 1.18E-09 |
| 7p15.2   | 27483166  | rs10250340          | A | G  | 0.321 | 4.66E-08 | 0.13     | 0.018 | 95768 | 12 | +++++++--+---   | 2.03E-09 |
| 7p15.2   | 27975919  | rs67152137          | C | G  | 0.264 | 8.12E-28 | 0.16     | 0.78  | 95768 | 12 | -----++----     | 8.57E-31 |
| 8p21.2   | 23470583  | rs7004327           | A | G  | 0.440 | 1.25E-18 | 0.70     | 0.27  | 95768 | 12 | -----+-----+    | 7.77E-22 |
| 8p21.2   | 23529521  | rs1160267           | A | G  | 0.569 | 9.76E-77 | 0.89     | 0.58  | 95768 | 12 | -----           | 6.29E-83 |
| 8q12.1   | 57132317  | rs145612921         | G | GC | 0.108 | 1.79E-08 | 0.62     | 0.73  | 94949 | 11 | -----+-----?    | 1.18E-10 |
| 8q12.1   | 57834357  | rs4738555           | T | C  | 0.569 | 9.74E-16 | 0.058    | 0.67  | 95768 | 12 | -----++-        | 3.20E-17 |
| 8q21.13  | 81811566  | 8:81811566_<br>CA_C | C | CA | 0.409 | 3.37E-09 | 0.16     | 0.44  | 95768 | 12 | +-----+--+      | 7.64E-11 |
| 8q24.21  | 128093297 | rs1016343           | T | C  | 0.203 | 1.90E-12 | 0.75     | 0.88  | 95768 | 12 | +++++++<br>+    | 3.59E-15 |
| 8q24.21  | 128228847 | rs74631227          | G | A  | 0.040 | 1.87E-09 | 0.055    | 0.029 | 94949 | 11 | -----+---??     | 2.02E-10 |
| 8q24.21  | 128318755 | rs10107982          | C | T  | 0.266 | 1.94E-27 | 0.17     | 0.78  | 95768 | 12 | -----+--        | 4.07E-30 |
| 8q24.21  | 128413305 | rs6983267           | T | G  | 0.481 | 5.42E-42 | 0.62     | 0.22  | 95768 | 12 | -----+-----     | 2.55E-45 |
| 8q24.21  | 128455167 | rs28645077          | T | A  | 0.354 | 4.50E-09 | 0.64     | 0.60  | 95768 | 12 | +++++++--+++++  | 1.23E-11 |
| 9q22.32  | 99146751  | rs7020681           | C | T  | 0.203 | 2.71E-09 | 0.012    | 0.68  | 95768 | 12 | +++++-----+-    | 1.40E-09 |
| 9q33.1   | 118258187 | rs9409165           | G | A  | 0.119 | 1.57E-08 | 0.050    | 0.55  | 95768 | 12 | +++++--+----    | 2.46E-09 |
| 9q33.1   | 120473180 | rs10983756          | T | C  | 0.057 | 1.46E-15 | 2.30E-03 | 0.88  | 94949 | 11 | +----+++---?    | 3.55E-15 |
| 9q33.2   | 123642351 | rs1609810           | T | C  | 0.658 | 1.41E-10 | 0.10     | 0.24  | 95768 | 12 | +--+-----+-     | 8.89E-12 |
| 10p12.31 | 21855753  | rs141268071         | G | T  | 0.019 | 1.97E-08 | 0.011    | 0.63  | 91496 | 9  | +++++++?+---??  | 2.23E-08 |
| 10p12.31 | 22308015  | rs10828285          | A | G  | 0.713 | 3.76E-12 | 0.53     | 0.96  | 95768 | 12 | -----+-----     | 2.21E-14 |
| 10p12.31 | 22363979  | rs3011633           | C | T  | 0.217 | 3.96E-17 | 0.43     | 0.80  | 95768 | 12 | +++++++--+++++- | 5.92E-20 |

|          |           |             |   |    |       |           |          |       |       |    |              |           |
|----------|-----------|-------------|---|----|-------|-----------|----------|-------|-------|----|--------------|-----------|
| 10p12.31 | 22590653  | rs79800006  | A | T  | 0.022 | 2.56E-11  | 2.08E-03 | 0.032 | 93960 | 10 | ++++++?+--?  | 1.01E-10  |
| 10p12.1  | 28096754  | rs2815506   | A | G  | 0.811 | 8.67E-13  | 0.50     | 0.44  | 95768 | 12 | +++++++--+   | 4.88E-15  |
| 10q11.23 | 51549496  | rs10993994  | T | C  | 0.402 | 2.31E-83  | 0.26     | 0.66  | 69887 | 7  | ?+?+++?+?+?  | 7.31E-87  |
| 10q11.23 | 51551900  | rs57592785  | C | CG | 0.846 | 1.67E-08  | 0.23     | 0.57  | 69887 | 7  | ?+?+++?+?+?  | 5.00E-10  |
| 10q26.12 | 122667022 | rs1530116   | G | T  | 0.337 | 7.75E-38  | 0.47     | 0.65  | 95768 | 12 | +++++++----  | 1.07E-40  |
| 10q26.12 | 122926366 | rs59421178  | A | G  | 0.163 | 2.64E-08  | 3.58E-03 | 0.12  | 95768 | 12 | +++--++---   | 8.51E-08  |
| 10q26.12 | 122933134 | rs12354663  | T | C  | 0.098 | 1.00E-14  | 0.44     | 0.79  | 95768 | 12 | +++++++--    | 2.87E-17  |
| 10q26.12 | 123009023 | rs144869102 | A | G  | 0.015 | 1.91E-09  | 0.43     | 0.91  | 94014 | 10 | ++++++?---?  | 1.35E-11  |
| 10q26.12 | 123025352 | rs61872992  | C | A  | 0.422 | 1.16E-21  | 0.93     | 0.51  | 95768 | 12 | -----+       | 3.15E-25  |
| 10q26.12 | 123049264 | rs10886902  | C | T  | 0.227 | 5.53E-115 | 0.82     | 0.54  | 95768 | 12 | +++++++<br>+ | 8.16E-118 |
| 10q26.12 | 123095366 | rs7914065   | T | C  | 0.253 | 8.09E-24  | 4.69E-03 | 0.46  | 95768 | 12 | +++++--+++   | 5.01E-24  |
| 10q26.13 | 123185303 | rs10749415  | A | G  | 0.937 | 1.28E-41  | 0.87     | 0.32  | 95768 | 12 | +++++++--    | 1.83E-45  |
| 10q26.13 | 123349324 | rs45631563  | T | A  | 0.043 | 3.42E-20  | 0.37     | 0.20  | 94949 | 11 | +++++++--?   | 7.94E-23  |
| 11p13    | 34676842  | rs896856    | T | G  | 0.475 | 6.99E-18  | 0.33     | 0.059 | 95768 | 12 | -++++-++++   | 2.34E-20  |
| 11p13    | 34780936  | rs10466455  | C | T  | 0.396 | 1.10E-22  | 0.33     | 0.71  | 95768 | 12 | +++++--+++   | 8.02E-26  |
| 11q22.2  | 102396607 | rs12285347  | C | T  | 0.443 | 1.68E-23  | 0.14     | 1.00  | 95768 | 12 | +++++++----  | 2.61E-25  |
| 11q22.2  | 102438778 | rs7129424   | A | G  | 0.563 | 3.67E-09  | 0.50     | 0.54  | 95768 | 12 | +++++++--    | 2.50E-11  |
| 12q21.31 | 84994000  | rs61928422  | T | C  | 0.169 | 3.34E-08  | 0.031    | 0.20  | 95768 | 12 | -++++-++---  | 1.11E-08  |
| 12q24.21 | 115094260 | rs11067228  | G | A  | 0.441 | 2.69E-27  | 0.19     | 0.99  | 95768 | 12 | -----        | 1.25E-29  |
| 12q24.21 | 115136391 | rs1463888   | G | T  | 0.337 | 7.38E-14  | 1.43E-03 | 0.79  | 95768 | 12 | -----++-     | 2.66E-13  |
| 12q24.23 | 118601003 | rs35506792  | C | T  | 0.093 | 3.12E-11  | 0.081    | 0.70  | 94949 | 11 | +---++---?   | 2.01E-12  |
| 13q14.3  | 51087443  | rs202346    | A | C  | 0.251 | 1.37E-25  | 0.034    | 0.54  | 95768 | 12 | +++++++<br>+ | 1.82E-27  |
| 13q14.3  | 51165912  | rs12869529  | G | A  | 0.039 | 3.42E-09  | 0.81     | 0.018 | 94949 | 11 | ---+---+???  | 9.40E-12  |
| 13q14.3  | 51194405  | rs573666    | T | C  | 0.340 | 3.17E-17  | 0.16     | 0.12  | 95768 | 12 | -++++-++++   | 8.44E-19  |
| 13q14.3  | 51446114  | rs12429206  | G | A  | 0.651 | 2.04E-10  | 1.53E-03 | 0.48  | 95768 | 12 | -----++-     | 2.01E-09  |
| 13q32.1  | 95799006  | rs61965887  | A | G  | 0.059 | 7.89E-12  | 0.58     | 0.53  | 94949 | 11 | +++++--++?   | 3.69E-14  |
| 14q13.3  | 37240591  | rs712329    | A | G  | 0.575 | 4.42E-08  | 0.022    | 0.56  | 95768 | 12 | ---+---+---  | 2.01E-08  |
| 14q32.13 | 94838142  | rs112635299 | T | G  | 0.020 | 9.68E-14  | 0.23     | 0.33  | 90125 | 7  | -----??-???  | 1.21E-15  |

|          |          |             |   |   |       |           |          |          |       |    |               |           |
|----------|----------|-------------|---|---|-------|-----------|----------|----------|-------|----|---------------|-----------|
| 14q32.13 | 95097556 | rs8023057   | G | A | 0.166 | 1.00E-28  | 0.19     | 0.062    | 68458 | 10 | ---?+---+?    | 3.23E-31  |
| 14q32.13 | 95138671 | rs12891726  | C | T | 0.571 | 3.81E-11  | 0.63     | 0.38     | 95768 | 12 | ++++++-+++++  | 9.05E-14  |
| 16p13.3  | 4304905  | rs2386890   | T | A | 0.334 | 1.05E-10  | 0.52     | 0.59     | 95768 | 12 | -+++++++--+   | 3.11E-13  |
| 16p13.3  | 4318206  | rs251739    | G | A | 0.507 | 7.24E-18  | 0.092    | 0.41     | 95768 | 12 | -+++++++--+   | 6.63E-20  |
| 16q23.1  | 77320605 | rs12921392  | G | A | 0.590 | 1.52E-08  | 0.42     | 0.90     | 95768 | 12 | -----         | 1.89E-10  |
| 16q23.1  | 77507275 | rs7206309   | T | C | 0.685 | 1.44E-19  | 0.61     | 0.51     | 95768 | 12 | -----+---     | 1.61E-22  |
| 16q24.1  | 86547001 | rs56404456  | T | C | 0.350 | 1.43E-09  | 0.58     | 0.071    | 69277 | 11 | ++++?++++--+  | 5.93E-12  |
| 17p12    | 12296124 | rs28444256  | G | C | 0.122 | 1.70E-08  | 1.42E-03 | 0.53     | 95768 | 12 | -+++++++--+   | 2.10E-07  |
| 17p12    | 12323258 | rs2721828   | A | G | 0.502 | 4.33E-11  | 0.017    | 0.74     | 95768 | 12 | -----++       | 1.81E-11  |
| 17q12    | 36099840 | rs11651755  | C | T | 0.491 | 6.54E-44  | 0.025    | 0.016    | 95768 | 12 | ----+-----    | 3.94E-45  |
| 18q23    | 76777252 | rs71279357  | A | T | 0.726 | 4.66E-10  | 0.71     | 0.94     | 69887 | 7  | ?+?+++?+?+?   | 1.83E-12  |
| 19q12    | 32059290 | rs7252125   | T | C | 0.339 | 3.18E-13  | 0.013    | 0.79     | 95768 | 12 | -----+++-     | 1.74E-13  |
| 19q12    | 32104979 | rs11084596  | C | T | 0.386 | 1.14E-25  | 0.52     | 0.92     | 69277 | 11 | ---?+-----    | 4.17E-29  |
| 19q13.32 | 46229711 | rs6509234   | G | T | 0.826 | 2.22E-08  | 0.030    | 0.79     | 95768 | 12 | -+++++++--+   | 7.70E-09  |
| 19q13.33 | 51264558 | rs183959820 | A | C | 0.021 | 1.13E-38  | 1.37E-03 | 1.78E-04 | 91442 | 9  | -----+?+??    | 1.16E-38  |
| 19q13.33 | 51280907 | rs1122124   | G | C | 0.420 | 1.08E-11  | 0.24     | 0.057    | 95768 | 12 | ++++-+----+   | 1.63E-13  |
| 19q13.33 | 51326106 | rs2659058   | T | C | 0.681 | 4.63E-27  | 1.66E-04 | 0.028    | 95768 | 12 | ----+----++   | 1.28E-25  |
| 19q13.33 | 51349090 | rs266849    | A | G | 0.794 | 7.39e-316 | 1.44E-05 | 0.035    | 95768 | 12 | +++++++<br>+  | 5.70e-319 |
| 19q13.33 | 51349781 | rs112343212 | T | C | 0.026 | 2.09E-28  | 0.026    | 0.72     | 93960 | 10 | +++++++?+~?   | 1.07E-29  |
| 19q13.33 | 51356929 | rs193199179 | T | C | 0.008 | 3.34E-12  | 0.039    | 0.62     | 92643 | 8  | +++++++??+?~? | 3.86E-13  |
| 19q13.33 | 51361382 | rs61752561  | A | G | 0.037 | 7.51E-51  | 0.35     | 0.18     | 94949 | 11 | -----+?       | 2.12E-54  |
| 19q13.33 | 51361757 | rs17632542  | C | T | 0.072 | 4.1e-641  | 1.02E-16 | 1.82E-07 | 94949 | 11 | -----?        | 3.15E-638 |
| 19q13.33 | 51364649 | rs17632611  | C | A | 0.065 | 9.10E-63  | 0.59     | 0.88     | 95768 | 12 | +++++++<br>+  | 1.05E-66  |
| 19q13.33 | 51383072 | rs198978    | T | G | 0.357 | 2.77E-29  | 0.062    | 0.054    | 95768 | 12 | -----         | 8.38E-31  |
| 19q13.33 | 51399309 | rs112035754 | G | A | 0.103 | 1.26E-17  | 0.060    | 0.022    | 95768 | 12 | -----+---+    | 3.79E-19  |
| 19q13.41 | 51401797 | rs8104538   | G | A | 0.309 | 1.13E-08  | 0.16     | 0.84     | 95768 | 12 | ----+---+--   | 7.21E-10  |
| 19q13.41 | 51440765 | rs2739403   | A | T | 0.179 | 1.02E-10  | 0.11     | 4.06E-03 | 94949 | 11 | +-----+++~?   | 2.53E-12  |
| 20q11.21 | 31950845 | rs291671    | A | G | 0.896 | 2.98E-16  | 0.28     | 2.87E-03 | 95768 | 12 | -----+---     | 1.19E-18  |



|          |           |             |   |     |       |          |          |       |       |    |               |          |
|----------|-----------|-------------|---|-----|-------|----------|----------|-------|-------|----|---------------|----------|
| 20q11.21 | 31966698  | rs2065703   | T | C   | 0.146 | 3.76E-11 | 0.45     | 0.23  | 95768 | 12 | +-----+--     | 2.72E-13 |
| 20q11.22 | 32397556  | rs117119427 | T | C   | 0.078 | 1.12E-10 | 0.14     | 0.040 | 94949 | 11 | -+++++++---+? | 4.00E-12 |
| 21q22.2  | 40289167  | rs2836750   | G | T   | 0.595 | 1.73E-10 | 0.35     | 0.94  | 95768 | 12 | -----         | 1.59E-12 |
| 22q13.31 | 45996298  | rs13268     | G | A   | 0.023 | 3.82E-08 | 0.74     | 0.37  | 94949 | 11 | +-----+?      | 1.63E-10 |
| Xp22.31  | 8912815   | rs112062538 | C | T   | 0.235 | 1.10E-17 | 0.086    | 0.84  | 95768 | 12 | +++++++<br>+  | 4.74E-19 |
| Xp22.2   | 16864303  | rs5969728   | A | G   | 0.378 | 1.01E-23 | 0.012    | 0.33  | 95768 | 12 | -----+--      | 4.09E-24 |
| Xp22.13  | 17831188  | rs200615037 | T | TTG | 0.043 | 1.35E-19 | 0.47     | 0.012 | 94567 | 10 | -----?-?      | 3.54E-22 |
| Xp22.11  | 23996164  | rs2520225   | A | G   | 0.538 | 9.67E-10 | 0.046    | 0.31  | 95768 | 12 | ----+--+---   | 1.98E-10 |
| Xp22.11  | 24109619  | rs7065158   | G | A   | 0.635 | 9.49E-27 | 0.18     | 0.18  | 95768 | 12 | -----+---     | 1.11E-29 |
| Xq13.1   | 69025920  | rs2804355   | T | A   | 0.612 | 1.74E-09 | 2.87E-03 | 0.52  | 95768 | 12 | +++++---+--   | 6.91E-09 |
| Xq13.1   | 69767264  | rs5936916   | T | A   | 0.478 | 2.55E-08 | 0.12     | 0.48  | 95768 | 12 | -----+--      | 2.75E-09 |
| Xq13.1   | 70125103  | rs62608084  | A | G   | 0.293 | 2.84E-24 | 9.37E-03 | 0.054 | 94949 | 11 | +++++++---+?  | 1.66E-24 |
| Xq26.2   | 132942023 | rs1908817   | C | G   | 0.665 | 5.49E-10 | 0.35     | 0.69  | 95768 | 12 | +++++++---+?  | 6.19E-12 |

Abbreviations:

EAF<sub>MEGA</sub> Average effect allele frequency weighted by the sample size of each input file

**Supplementary Table 6:** Population-specific effect estimates for PSA-associated variants that reached genome-wide significance in the multi-ancestry MR-MEGA meta-regression analysis, but not the multi-ancestry fixed effects meta-analysis using METAL.

| Regional position | Variant ID | Effect Allele | Other Allele | EUR (N=85,824) |           |                    | AFR (N=3,509) |           |                    | HIS/LAT (N=3,098) |           |                    | EAS (N=3,337) |           |                    | New <sup>2</sup> |     |
|-------------------|------------|---------------|--------------|----------------|-----------|--------------------|---------------|-----------|--------------------|-------------------|-----------|--------------------|---------------|-----------|--------------------|------------------|-----|
|                   |            |               |              | EAF            | $\beta^1$ | P <sub>METAL</sub> | EAF           | $\beta^1$ | P <sub>METAL</sub> | EAF               | $\beta^1$ | P <sub>METAL</sub> | EAF           | $\beta^1$ | P <sub>METAL</sub> |                  |     |
| 3q28              | 191387768  | rs114388981   | A            | T              | 0.003     | -0.031             | 0.62          | 0.126     | -0.019             | 0.49              | 0.011     | -0.453             | 3.9E-06       | 0.029     | 0.225              | 1.0E-04          | yes |
| 5q15              | 96727294   | rs291812      | T            | C              | 0.486     | 0.016              | 2.3E-05       | 0.133     | -0.026             | 0.35              | 0.474     | 0.010              | 0.64          | 0.350     | 0.097              | 1.2E-06          | yes |
| 10q26.12          | 122926366  | rs59421178    | A            | G              | 0.162     | 0.028              | 1.7E-07       | 0.159     | -0.045             | 0.080             | 0.170     | 0.020              | 0.47          | 0.210     | 0.067              | 5.5E-03          | yes |
| 17p12             | 12296124   | rs28444256    | C            | G              | 0.891     | -0.029             | 3.0E-06       | 0.697     | -0.034             | 0.095             | 0.859     | -0.108             | 2.4E-04       | 0.746     | 0.018              | 0.42             | yes |

<sup>1</sup> Per allele change in log(PSA)

<sup>2</sup> Variants that were independent of previously reported PSA associations, including those identified in the fixed-effects meta-analysis, at LD  $r^2 < 0.01$  were considered novel

Abbreviations:

EAF      Effect allele frequency

**Supplementary Table 8:** Associations with prostate cancer risk for 128 PSA lead variants obtained from summary statistics from the PRACTICAL consortium GWAS by Conti & Darst et al. (2021). Original GWAS estimates are presented for the European ancestry meta-analysis (85,554 cases and 91,972 controls) and multi-ancestry meta-analysis (107,247 cases and 127,006) alongside estimates corrected for index event bias using the Dudbridge method.

| Region  | Position (b37) | Variant ID | PSA-increasing Allele | P <sub>PSA</sub> | Prostate Cancer (European Ancestry) |         |                             |                  | Prostate Cancer (Multi-Ancestry) |         |                             |                  |
|---------|----------------|------------|-----------------------|------------------|-------------------------------------|---------|-----------------------------|------------------|----------------------------------|---------|-----------------------------|------------------|
|         |                |            |                       |                  | Original GWAS                       |         | Bias Corrected <sup>1</sup> |                  | Original GWAS                    |         | Bias Corrected <sup>2</sup> |                  |
|         |                |            |                       |                  | OR                                  | P       | OR <sub>adj</sub>           | P <sub>adj</sub> | OR                               | P       | OR <sub>adj</sub>           | P <sub>adj</sub> |
| 1p32.3  | 51237409       | rs12569177 | C                     | 3.2E-13          | 1.04                                | 3.6E-07 | 1.01                        | 0.33             | 1.03                             | 4.5E-05 | 1.00                        | 0.87             |
| 1p22.3  | 88199778       | rs12131120 | T                     | 1.6E-19          | 1.04                                | 1.7E-08 | 1.00                        | 0.62             | 1.04                             | 2.0E-09 | 1.01                        | 0.49             |
| 1p13.2  | 112264274      | rs2076591  | C                     | 2.6E-13          | 1.02                                | 0.012   | 0.99                        | 0.23             | 1.02                             | 0.031   | 0.98                        | 0.056            |
| 1q21.3  | 154868055      | rs4845681  | T                     | 7.7E-09          | 1.05                                | 2.5E-12 | 1.03                        | 9.6E-04          | 1.05                             | 8.5E-11 | 1.02                        | 9.2E-03          |
| 1q25.3  | 184191716      | rs12046452 | C                     | 9.0E-09          | 1.04                                | 3.2E-06 | 1.01                        | 0.15             | 1.03                             | 9.9E-06 | 1.01                        | 0.36             |
| 1q32.1  | 205632217      | rs71152447 | G                     | 9.9E-12          | 1.00                                | 0.96    | 0.83                        | 6.2E-04          | 1.02                             | 0.51    | 0.86                        | 4.9E-04          |
| 1q32.1  | 205636334      | rs4951018  | C                     | 2.7E-13          | 1.05                                | 6.2E-07 | 1.01                        | 0.40             | 1.05                             | 1.1E-10 | 1.02                        | 0.096            |
| 1q41    | 219694903      | rs12034581 | C                     | 2.5E-12          | 1.00                                | 0.91    | 0.97                        | 1.1E-03          | 1.00                             | 0.56    | 0.98                        | 2.3E-03          |
| 1q41    | 219954267      | rs6664688  | G                     | 3.9E-08          | 0.97                                | 5.9E-03 | 0.95                        | 5.1E-07          | 0.99                             | 0.26    | 0.96                        | 1.0E-04          |
| 2p24.2  | 18911674       | rs12710685 | G                     | 2.3E-08          | 1.00                                | 0.94    | 0.96                        | 9.3E-03          | 1.01                             | 0.39    | 0.97                        | 0.025            |
| 2p24.1  | 20880833       | rs10193919 | T                     | 1.5E-15          | 1.07                                | 1.4E-19 | 1.04                        | 5.8E-05          | 1.08                             | 4.3E-30 | 1.05                        | 2.1E-08          |
| 2p23.3  | 25463871       | rs734693   | T                     | 3.9E-08          | 1.01                                | 0.16    | 0.99                        | 0.20             | 1.01                             | 0.46    | 0.98                        | 0.029            |
| 2p21    | 43072828       | rs1123695  | G                     | 3.3E-16          | 1.04                                | 5.3E-08 | 1.01                        | 0.42             | 1.04                             | 1.4E-09 | 1.01                        | 0.32             |
| 2p21    | 43618819       | rs11899863 | C                     | 1.7E-13          | 1.06                                | 1.0E-05 | 1.01                        | 0.72             | 1.05                             | 9.9E-06 | 1.00                        | 0.81             |
| 2p16.1  | 60759747       | rs2556375  | G                     | 1.8E-32          | 0.98                                | 0.079   | 0.92                        | 2.3E-12          | 0.98                             | 0.029   | 0.92                        | 4.3E-15          |
| 2p15    | 63277843       | rs58235267 | G                     | 4.9E-13          | 1.12                                | 6.6E-54 | 1.09                        | 9.8E-24          | 1.12                             | 5.4E-72 | 1.09                        | 8.5E-31          |
| 2p13.2  | 72059504       | rs11679946 | T                     | 2.6E-08          | 1.01                                | 0.088   | 0.99                        | 0.26             | 1.01                             | 0.16    | 0.99                        | 0.093            |
| 2q33.1  | 198929083      | rs34388051 | A                     | 2.2E-08          | 1.00                                | 0.71    | 0.98                        | 0.022            | 1.01                             | 0.22    | 0.99                        | 0.078            |
| 3q13.2  | 113290793      | rs4682495  | A                     | 2.9E-09          | 1.09                                | 1.7E-28 | 1.06                        | 5.7E-12          | 1.08                             | 2.6E-28 | 1.05                        | 1.7E-10          |
| 3q21.3  | 128067275      | rs11709611 | C                     | 2.0E-10          | 1.10                                | 4.1E-18 | 1.06                        | 1.2E-05          | 1.10                             | 1.6E-19 | 1.05                        | 1.2E-05          |
| 3q23    | 141115219      | rs1582874  | C                     | 1.0E-16          | 1.05                                | 1.8E-09 | 1.01                        | 0.21             | 1.04                             | 1.6E-10 | 1.01                        | 0.19             |
| 3q25.33 | 160130592      | rs10673842 | TTATC                 | 2.2E-08          | 1.03                                | 9.6E-06 | 1.01                        | 0.46             | 1.03                             | 6.2E-05 | 1.00                        | 0.83             |

|         |           |                 |    |         |      |          |      |         |      |          |      |         |
|---------|-----------|-----------------|----|---------|------|----------|------|---------|------|----------|------|---------|
| 3q27.2  | 185246981 | rs4012714       | A  | 1.1E-08 | 1.02 | 0.021    | 0.99 | 0.30    | 1.02 | 0.032    | 0.99 | 0.19    |
| 3q27.3  | 186746994 | rs12629450      | C  | 2.6E-10 | 1.01 | 0.32     | 0.98 | 0.039   | 1.01 | 0.27     | 0.98 | 0.024   |
| 3q28    | 189482770 | rs6765473       | T  | 3.2E-10 | 1.01 | 0.61     | 0.97 | 0.013   | 1.01 | 0.51     | 0.97 | 0.017   |
| 4p15.2  | 24410024  | rs4276269       | G  | 2.0E-08 | 0.99 | 0.24     | 0.96 | 3.1E-04 | 0.98 | 0.041    | 0.96 | 4.7E-06 |
| 4q31.22 | 146890261 | rs9968429       | G  | 6.3E-18 | 1.02 | 0.011    | 0.98 | 0.058   | 1.03 | 6.0E-05  | 0.99 | 0.28    |
| 4q32.1  | 157497921 | rs13115840      | A  | 4.3E-17 | 1.01 | 0.061    | 0.98 | 0.018   | 1.02 | 5.9E-03  | 0.98 | 0.056   |
| 5p15.33 | 1285974   | rs7705526       | A  | 1.2E-08 | 0.94 | 1.6E-12  | 0.92 | 5.3E-19 | 0.94 | 1.3E-16  | 0.92 | 1.5E-23 |
| 5p15.33 | 1322087   | rs401681        | C  | 7.0E-54 | 1.04 | 4.0E-06  | 0.97 | 4.2E-04 | 1.02 | 0.011    | 0.95 | 1.9E-09 |
| 5q14.3  | 92052005  | rs7732515       | A  | 3.5E-14 | 1.02 | 0.084    | 0.98 | 0.040   | 1.02 | 0.024    | 0.98 | 0.071   |
| 5q35.2  | 172945918 | rs889017        | C  | 2.6E-08 | 1.04 | 6.0E-05  | 1.01 | 0.40    | 1.03 | 1.2E-04  | 1.00 | 0.72    |
| 6p22.3  | 15463139  | rs926309        | T  | 1.6E-12 | 1.01 | 0.41     | 0.98 | 9.1E-03 | 1.01 | 0.13     | 0.98 | 0.024   |
| 6p22.3  | 16515154  | rs236961        | T  | 8.6E-12 | 0.97 | 3.0E-05  | 0.94 | 5.3E-12 | 0.97 | 5.1E-06  | 0.94 | 1.1E-13 |
| 6p22.1  | 29915061  | rs2248162       | C  | 3.6E-10 | 1.04 | 2.9E-06  | 1.01 | 0.35    | 1.03 | 3.9E-06  | 1.01 | 0.45    |
| 6p21.31 | 34212537  | rs551980123     | TG | 1.6E-10 | 1.01 | 0.74     | 0.93 | 1.4E-03 | 1.01 | 0.68     | 0.93 | 1.6E-03 |
| 6p21.1  | 43711981  | rs1535507       | T  | 1.5E-22 | 1.05 | 4.8E-07  | 1.00 | 0.72    | 1.05 | 1.1E-07  | 0.99 | 0.50    |
| 6q22.33 | 129168057 | rs73583119      | A  | 3.5E-08 | -    | -        | -    | -       | -    | -        | -    | -       |
| 7p15.3  | 20909622  | rs204592        | G  | 1.2E-09 | 1.05 | 9.8E-11  | 1.02 | 6.7E-03 | 1.05 | 2.5E-13  | 1.02 | 1.9E-03 |
| 7p15.3  | 21839896  | rs6956349       | T  | 8.6E-09 | 1.03 | 8.9E-05  | 1.01 | 0.55    | 1.03 | 5.6E-06  | 1.01 | 0.26    |
| 7p15.2  | 27281792  | rs17437810      | A  | 8.0E-09 | 1.06 | 0.037    | 0.97 | 0.26    | 1.06 | 0.035    | 0.97 | 0.30    |
| 7p15.2  | 27483166  | rs10250340      | A  | 2.0E-09 | 1.02 | 2.9E-03  | 1.00 | 0.78    | 1.02 | 1.2E-03  | 1.00 | 0.73    |
| 7p15.2  | 27975919  | rs67152137      | G  | 8.6E-31 | 1.15 | 3.2E-53  | 1.08 | 8.9E-16 | 1.14 | 2.0E-63  | 1.08 | 5.5E-18 |
| 8p21.2  | 23437981  | rs2928681       | C  | 3.5E-18 | 1.05 | 3.2E-10  | 1.01 | 0.18    | 1.04 | 8.5E-11  | 1.01 | 0.29    |
| 8p21.2  | 23529521  | rs1160267       | G  | 6.3E-83 | 1.14 | 2.0E-68  | 1.05 | 1.8E-09 | 1.16 | 3.3E-112 | 1.07 | 2.1E-20 |
| 8q12.1  | 57138676  | rs36112366      | T  | 7.3E-11 | 1.02 | 0.045    | 0.98 | 0.18    | 1.02 | 0.074    | 0.98 | 0.099   |
| 8q12.1  | 57834357  | rs4738555       | C  | 3.2E-17 | 1.02 | 0.017    | 0.98 | 0.071   | 1.02 | 5.6E-03  | 0.99 | 0.072   |
| 8q21.13 | 81811566  | 8:81811566_CA_C | CA | 7.6E-11 | 0.99 | 0.072    | 0.96 | 2.4E-06 | 0.99 | 0.047    | 0.96 | 6.0E-07 |
| 8q23.1  | 108849527 | rs1494920       | T  | 4.8E-08 | 1.02 | 0.041    | 0.99 | 0.44    | 1.01 | 0.063    | 0.99 | 0.23    |
| 8q24.21 | 127817460 | rs7843726       | G  | 1.7E-08 | 1.05 | 7.8E-06  | 1.01 | 0.26    | 1.06 | 1.7E-08  | 1.02 | 0.057   |
| 8q24.21 | 128093297 | rs1016343       | T  | 3.6E-15 | 1.25 | 2.4E-138 | 1.20 | 6.1E-72 | 1.25 | 5.9E-181 | 1.20 | 5.1E-88 |

|          |           |             |   |          |      |          |      |         |      |          |      |         |
|----------|-----------|-------------|---|----------|------|----------|------|---------|------|----------|------|---------|
| 8q24.21  | 128318755 | rs10107982  | T | 4.1E-30  | 1.15 | 4.6E-64  | 1.09 | 1.6E-20 | 1.15 | 1.3E-69  | 1.09 | 1.7E-22 |
| 8q24.21  | 128413305 | rs6983267   | G | 2.6E-45  | 1.23 | 2.8E-164 | 1.16 | 2.6E-65 | 1.22 | 2.1E-198 | 1.16 | 1.7E-77 |
| 9q22.32  | 99146751  | rs7020681   | C | 1.4E-09  | 1.02 | 0.052    | 0.99 | 0.26    | 1.02 | 0.026    | 0.99 | 0.26    |
| 9q33.1   | 118258080 | rs150402584 | T | 9.0E-10  | 1.01 | 0.35     | 0.97 | 0.038   | 1.02 | 0.12     | 0.98 | 0.079   |
| 9q33.1   | 120475302 | rs4986790   | A | 7.1E-17  | 1.04 | 0.012    | 0.97 | 0.068   | 1.05 | 8.8E-04  | 0.98 | 0.19    |
| 9q33.2   | 123643426 | rs59482735  | T | 2.9E-12  | 1.03 | 3.3E-04  | 0.99 | 0.47    | 1.03 | 1.1E-04  | 0.99 | 0.53    |
| 10p12.31 | 22363979  | rs3011633   | C | 5.9E-20  | 1.01 | 0.21     | 0.97 | 9.5E-04 | 1.01 | 0.31     | 0.97 | 2.2E-04 |
| 10p12.2  | 23398448  | rs1857279   | C | 3.9E-11  | 1.02 | 0.010    | 0.99 | 0.36    | 1.03 | 9.9E-05  | 1.00 | 0.92    |
| 10p12.1  | 28096754  | rs2815506   | A | 4.9E-15  | 1.03 | 1.7E-03  | 0.99 | 0.32    | 1.03 | 5.8E-04  | 0.99 | 0.19    |
| 10q11.23 | 51549496  | rs10993994  | T | 7.3E-87  | 1.23 | 9.1E-165 | 1.11 | 2.8E-33 | 1.21 | 8.9E-192 | 1.10 | 3.1E-34 |
| 10q25.2  | 111991733 | rs562417881 | G | 5.6E-09  | 1.03 | 0.014    | 0.99 | 0.34    | 1.03 | 0.014    | 0.99 | 0.28    |
| 10q26.12 | 122631067 | rs9325569   | A | 9.9E-41  | 1.02 | 0.052    | 0.96 | 1.9E-06 | 1.01 | 0.19     | 0.95 | 7.9E-09 |
| 10q26.12 | 123049264 | rs10886902  | C | 8.2E-118 | 0.94 | 5.4E-11  | 0.84 | 4.9E-65 | 0.94 | 7.0E-13  | 0.85 | 4.3E-72 |
| 10q26.13 | 123135200 | rs10788173  | C | 2.9E-08  | 1.00 | 0.85     | 0.98 | 5.6E-03 | 1.00 | 0.72     | 0.98 | 1.6E-03 |
| 10q26.13 | 123185303 | rs10749415  | A | 1.8E-45  | 1.10 | 3.2E-08  | 0.97 | 0.14    | 1.11 | 5.2E-16  | 0.99 | 0.51    |
| 10q26.13 | 123349324 | rs45631563  | T | 7.9E-23  | 1.06 | 9.4E-04  | 0.96 | 0.044   | 1.07 | 1.9E-04  | 0.97 | 0.10    |
| 10q26.13 | 126737579 | rs3012065   | C | 2.2E-08  | 1.04 | 1.1E-07  | 1.02 | 0.047   | 1.04 | 1.1E-06  | 1.01 | 0.20    |
| 11p15.5  | 197557    | rs7103852   | G | 1.2E-09  | 1.00 | 0.98     | 0.95 | 4.7E-03 | 1.00 | 0.70     | 0.95 | 5.0E-04 |
| 11p13    | 34718279  | rs553481604 | G | 1.7E-11  | 1.00 | 0.56     | 0.96 | 6.9E-05 | 1.00 | 0.94     | 0.97 | 2.1E-04 |
| 11p13    | 34780936  | rs10466455  | C | 8.0E-26  | 1.01 | 0.23     | 0.97 | 9.7E-05 | 1.00 | 0.49     | 0.96 | 1.9E-06 |
| 11q13.5  | 76153279  | rs58015965  | G | 4.0E-08  | 1.06 | 8.3E-12  | 1.03 | 8.8E-04 | 1.05 | 3.6E-13  | 1.03 | 4.6E-04 |
| 11q22.2  | 102396607 | rs12285347  | C | 2.6E-25  | 0.93 | 4.0E-21  | 0.89 | 3.6E-40 | 0.93 | 5.4E-25  | 0.89 | 2.1E-45 |
| 11q22.2  | 102438778 | rs7129424   | A | 2.5E-11  | 0.98 | 1.8E-03  | 0.95 | 3.5E-09 | 0.97 | 2.8E-05  | 0.95 | 3.1E-12 |
| 12p13.31 | 9222286   | rs1805664   | T | 9.2E-09  | 1.01 | 0.42     | 0.98 | 0.042   | 1.01 | 0.42     | 0.98 | 0.033   |
| 12q14.3  | 66393756  | rs74097857  | T | 1.2E-09  | 1.05 | 2.1E-06  | 1.02 | 0.24    | 1.05 | 7.4E-06  | 1.01 | 0.35    |
| 12q21.31 | 84994000  | rs61928422  | T | 1.1E-08  | 1.02 | 0.031    | 0.99 | 0.40    | 1.02 | 0.016    | 0.99 | 0.37    |
| 12q24.21 | 115099805 | rs10774760  | G | 2.4E-30  | 1.03 | 8.1E-04  | 0.98 | 0.013   | 1.03 | 1.8E-04  | 0.98 | 0.012   |
| 12q24.21 | 115155460 | rs11067251  | G | 1.9E-09  | 1.01 | 0.39     | 0.98 | 0.046   | 1.01 | 0.48     | 0.98 | 0.024   |
| 12q24.23 | 118855432 | rs1045542   | G | 1.2E-13  | 1.00 | 0.89     | 0.95 | 2.2E-04 | 1.00 | 0.74     | 0.95 | 1.1E-04 |

|          |          |             |    |          |      |          |      |         |      |          |      |         |
|----------|----------|-------------|----|----------|------|----------|------|---------|------|----------|------|---------|
| 13q14.3  | 51087443 | rs202346    | A  | 1.8E-27  | 1.04 | 5.3E-06  | 0.99 | 0.21    | 1.04 | 2.9E-08  | 0.99 | 0.38    |
| 13q14.3  | 51165912 | rs12869529  | A  | 9.4E-12  | 1.03 | 0.17     | 0.96 | 0.053   | 1.02 | 0.39     | 0.95 | 9.0E-03 |
| 13q14.3  | 51445360 | rs9563006   | A  | 5.6E-11  | 1.03 | 2.3E-05  | 1.01 | 0.51    | 1.03 | 2.4E-06  | 1.01 | 0.38    |
| 13q22.1  | 74055303 | rs1361057   | C  | 3.3E-08  | 1.02 | 0.026    | 0.99 | 0.52    | 1.02 | 0.012    | 0.99 | 0.50    |
| 13q32.1  | 95799006 | rs61965887  | A  | 3.7E-14  | 0.95 | 1.2E-03  | 0.89 | 1.4E-10 | 0.95 | 2.5E-03  | 0.89 | 6.3E-10 |
| 14q13.3  | 37240591 | rs712329    | G  | 2.0E-08  | 1.01 | 0.11     | 0.99 | 0.21    | 1.01 | 0.21     | 0.99 | 0.078   |
| 14q32.13 | 94838142 | rs112635299 | G  | 1.2E-15  | 1.14 | 1.7E-06  | 1.01 | 0.65    | 1.14 | 1.7E-06  | 1.02 | 0.56    |
| 14q32.13 | 95104745 | rs72695000  | C  | 7.4E-28  | 1.04 | 2.8E-04  | 0.98 | 0.049   | 1.04 | 8.5E-05  | 0.98 | 0.088   |
| 15q22.31 | 66941399 | rs8038722   | G  | 3.2E-08  | 1.01 | 0.049    | 0.99 | 0.35    | 1.03 | 4.4E-06  | 1.01 | 0.29    |
| 16p13.3  | 4318206  | rs251739    | G  | 6.6E-20  | 1.03 | 1.2E-05  | 0.99 | 0.55    | 1.03 | 1.4E-06  | 1.00 | 0.55    |
| 16p13.13 | 11201428 | rs9933507   | C  | 3.8E-10  | 1.00 | 0.54     | 0.97 | 5.1E-04 | 1.00 | 0.94     | 0.97 | 1.2E-03 |
| 16q23.1  | 77507275 | rs7206309   | C  | 1.6E-22  | 1.00 | 0.86     | 0.96 | 8.3E-06 | 1.00 | 0.88     | 0.96 | 1.1E-06 |
| 16q24.1  | 86554784 | rs13334022  | T  | 3.4E-11  | 1.00 | 0.86     | 0.95 | 2.0E-03 | 1.01 | 0.30     | 0.97 | 0.013   |
| 17p13.3  | 1994071  | rs3760230   | C  | 2.8E-08  | 1.00 | 0.69     | 0.98 | 0.026   | 1.01 | 0.45     | 0.98 | 0.033   |
| 17p13.1  | 7571752  | rs78378222  | G  | 2.8E-10  | 1.25 | 4.8E-11  | 1.10 | 0.013   | 1.25 | 4.7E-11  | 1.11 | 8.9E-03 |
| 17p13.1  | 7793367  | rs34009884  | C  | 1.1E-08  | 1.10 | 1.2E-12  | 1.06 | 3.2E-04 | 1.10 | 1.5E-13  | 1.06 | 1.1E-04 |
| 17p12    | 12320741 | rs7219536   | T  | 5.7E-12  | 1.01 | 0.24     | 0.98 | 0.035   | 1.01 | 0.090    | 0.98 | 0.072   |
| 17p12    | 12556260 | rs9889266   | C  | 8.9E-10  | 1.02 | 0.039    | 0.99 | 0.27    | 1.01 | 0.21     | 0.98 | 0.040   |
| 17q12    | 36099952 | rs10908278  | A  | 2.1E-46  | 1.23 | 2.7E-161 | 1.16 | 1.1E-63 | 1.22 | 1.1E-194 | 1.15 | 5.8E-75 |
| 18q23    | 76777252 | rs71279357  | A  | 1.8E-12  | 1.09 | 8.0E-21  | 1.04 | 4.3E-05 | 1.08 | 1.2E-20  | 1.04 | 1.8E-04 |
| 19q12    | 32055024 | rs11084590  | C  | 3.4E-18  | 1.00 | 0.69     | 0.96 | 4.7E-06 | 1.00 | 0.52     | 0.96 | 1.4E-06 |
| 19q13.32 | 46229711 | rs6509234   | G  | 7.7E-09  | 1.01 | 0.36     | 0.98 | 0.038   | 1.01 | 0.53     | 0.97 | 0.014   |
| 19q13.33 | 49206462 | rs681343    | T  | 4.4E-08  | 1.01 | 0.47     | 0.98 | 0.048   | 1.00 | 0.91     | 0.98 | 9.4E-03 |
| 19q13.33 | 51225544 | rs890863    | G  | 1.1E-08  | 1.00 | 0.78     | 0.97 | 2.2E-03 | 0.99 | 0.26     | 0.97 | 7.7E-05 |
| 19q13.33 | 51323501 | rs1054713   | A  | 4.8E-22  | 1.02 | 5.1E-03  | 0.98 | 0.026   | 1.02 | 9.2E-04  | 0.98 | 0.032   |
| 19q13.33 | 51340794 | rs2659053   | A  | 5.4E-94  | 1.06 | 9.8E-15  | 0.97 | 1.2E-03 | 1.05 | 2.7E-12  | 0.96 | 2.7E-06 |
| 19q13.33 | 51349841 | rs113920094 | C  | 6.5E-09  | 1.11 | 0.083    | 0.94 | 0.35    | 1.11 | 0.083    | 0.95 | 0.40    |
| 19q13.33 | 51360398 | rs578067733 | GA | 1.7E-12  | 1.06 | 0.61     | 0.88 | 0.30    | 1.10 | 0.025    | 0.92 | 0.081   |
| 19q13.33 | 51361757 | rs17632542  | T  | 3.2E-638 | 1.35 | 8.3E-90  | 0.89 | 2.7E-12 | 1.35 | 3.9E-93  | 0.90 | 1.7E-10 |

|          |           |             |     |         |      |         |      |         |      |         |      |         |
|----------|-----------|-------------|-----|---------|------|---------|------|---------|------|---------|------|---------|
| 19q13.33 | 51365466  | rs2735837   | G   | 7.2E-58 | 1.06 | 1.3E-04 | 0.94 | 2.1E-04 | 1.08 | 3.2E-14 | 0.97 | 0.017   |
| 19q13.33 | 51373744  | rs12983994  | T   | 1.1E-17 | 1.02 | 0.28    | 0.94 | 1.9E-03 | 1.01 | 0.40    | 0.94 | 1.4E-04 |
| 19q13.33 | 51378275  | rs112103380 | C   | 1.7E-18 | 1.15 | 3.6E-03 | 0.90 | 0.059   | 1.15 | 3.6E-03 | 0.91 | 0.080   |
| 19q13.33 | 51383072  | rs198978    | G   | 8.4E-31 | 1.00 | 0.55    | 0.95 | 9.1E-10 | 1.00 | 0.73    | 0.95 | 3.3E-10 |
| 19q13.41 | 51421334  | rs141135092 | C   | 1.2E-09 | 1.05 | 0.097   | 0.95 | 0.14    | 1.06 | 0.050   | 0.96 | 0.25    |
| 19q13.41 | 51441425  | rs80122351  | G   | 1.2E-10 | 1.01 | 0.33    | 0.97 | 0.019   | 1.00 | 0.60    | 0.97 | 6.2E-03 |
| 20q11.21 | 31950845  | rs291671    | G   | 1.2E-18 | 1.03 | 0.015   | 0.97 | 0.047   | 1.03 | 2.4E-03 | 0.97 | 0.038   |
| 21q22.2  | 40289167  | rs2836750   | T   | 1.6E-12 | 1.04 | 3.5E-06 | 1.01 | 0.48    | 1.04 | 6.7E-07 | 1.01 | 0.47    |
| 22q13.31 | 45996298  | rs13268     | A   | 1.6E-10 | 1.02 | 0.47    | 0.93 | 8.8E-03 | 1.02 | 0.48    | 0.93 | 0.010   |
| Xp22.31  | 8912815   | rs112062538 | C   | 4.7E-19 | 1.02 | 2.5E-03 | 0.99 | 0.035   | 1.02 | 4.7E-03 | 0.98 | 8.8E-03 |
| Xp22.2   | 16844831  | rs62586587  | G   | 3.6E-25 | 1.02 | 1.2E-03 | 0.98 | 8.0E-03 | 1.02 | 4.3E-04 | 0.98 | 6.6E-03 |
| Xp22.13  | 17831188  | rs200615037 | TTG | 3.5E-22 | 1.06 | 1.2E-04 | 0.98 | 0.26    | 1.06 | 1.9E-05 | 0.98 | 0.19    |
| Xp22.11  | 24109619  | rs7065158   | A   | 1.1E-29 | 1.01 | 0.10    | 0.97 | 1.0E-05 | 1.01 | 0.15    | 0.97 | 3.4E-06 |
| Xp11.22  | 51242364  | rs5987424   | A   | 2.1E-08 | 1.11 | 1.1E-78 | 1.09 | 2.4E-37 | 1.10 | 4.6E-84 | 1.08 | 4.1E-39 |
| Xp11.21  | 55936822  | rs10855058  | A   | 7.6E-09 | 1.02 | 5.7E-04 | 1.00 | 1.00    | 1.02 | 8.3E-05 | 1.00 | 0.89    |
| Xq13.1   | 68996186  | rs2520386   | G   | 4.2E-11 | 1.02 | 0.025   | 0.99 | 0.16    | 1.01 | 0.060   | 0.99 | 0.089   |
| Xq13.1   | 70125103  | rs62608084  | A   | 1.7E-24 | 1.04 | 1.4E-14 | 1.01 | 0.37    | 1.04 | 4.6E-14 | 1.00 | 0.49    |
| Xq26.2   | 132935739 | rs4829762   | T   | 5.9E-12 | 1.02 | 3.8E-03 | 0.99 | 0.23    | 1.01 | 0.012   | 0.99 | 0.056   |
| Xq26.3   | 133703924 | rs5930651   | T   | 1.0E-08 | 1.01 | 0.13    | 0.99 | 0.14    | 1.01 | 0.14    | 0.99 | 0.077   |

<sup>1</sup> Bias-corrected estimated were obtained as follows:  $\beta^{adj} = \beta - b * \beta_{PSA}$  and the corresponding  $OR^{adj} = \exp(\beta^{adj})$

<sup>2</sup> Bias-corrected multi-ancestry effects should be interpreted with caution since the bias correction factor ( $b$ ) was estimated from variants that were LD-pruned ( $r^2 < 0.10$ ) based on 1000G EUR. The same set of pruned variants was used for European and multi-ancestry bias analyses. For the multi-ancestry analysis SNP effects on PSA and prostate cancer were obtained from multi-ancestry GWAS summary statistics.

Abbreviations:

EAF      Effect allele frequency

**Supplementary Table 9:** Comparison of estimates of index event bias ( $b$ ), where PSA variation corresponds to the selection trait and prostate cancer is the outcome trait, using the Dudbridge method and SlopeHunter.

| Method      | GWAS                        | $P_{\text{thresh}}^1$ | $b$    | $SE_b$                | (95% CI) <sup>2</sup> |
|-------------|-----------------------------|-----------------------|--------|-----------------------|-----------------------|
| Dudbridge   | EUR                         | -                     | 1.1436 | $2.91 \times 10^{-4}$ | (1.1431 – 1.1442)     |
|             | Multi-ancestry <sup>3</sup> | -                     | 1.1039 | $1.49 \times 10^{-4}$ | (1.1037 – 1.1043)     |
| SlopeHunter | EUR                         | 0.1                   | 0.382  | 0.096                 | (0.195 – 0.570)       |
|             |                             | 0.05                  | 0.368  | 0.036                 | (0.298 – 0.439)       |
|             |                             | 0.01                  | 0.322  | 0.157                 | (0.014 – 0.630)       |
|             |                             | 0.001                 | 0.476  | 0.135                 | (0.213 – 0.740)       |
|             |                             | 0.005                 | 0.333  | 0.134                 | (0.070 – 0.595)       |
|             |                             | $5.0 \times 10^{-4}$  | 0.452  | 0.106                 | (0.245 – 0.659)       |

<sup>1</sup> P-value threshold for SNP-incidence associations. Associations with p-values larger than  $P_{\text{thresh}}$  are excluded prior to fitting the main model-based clustering in SlopeHunter. The default recommended setting is 0.001. This parameter is only applicable to SlopeHunter, no thresholding or clustering is performed in the Dudbridge method.

<sup>2</sup> Bootstrapped 95% confidence intervals estimated based on 1500 replicates are expected to have better coverage than empirical 95% confidence intervals based on  $SE_b$  when the normal approximation for outcome effect sizes may be inappropriate.

<sup>3</sup> Multi-ancestry results should be interpreted with caution because they were estimated using the same set of variants as for the European ancestry analysis, selected by LD-pruning ( $r^2 < 0.10$ ) 1000G EUR. Effect estimates for the reference panel variants were obtained from multi-ancestry GWAS meta-analyses for PSA and prostate cancer and used as inputs to estimate bias ( $b$ )



**Supplementary Table 10:** Associations for 209 prostate cancer index variants selected from European ancestry (85,554 cases and 91,972 controls) summary statistics from the PRACTICAL consortium GWAS by Conti & Darst et al. (2021). Original GWAS estimates are presented alongside estimates corrected for index event bias using the Dudbridge method.

| Region  | Position (b37) | Index variant ID <sup>1</sup> | Prostate Cancer Alleles |       | PSA Estimates   |           | Prostate Cancer Estimates |          |                             |                  |
|---------|----------------|-------------------------------|-------------------------|-------|-----------------|-----------|---------------------------|----------|-----------------------------|------------------|
|         |                |                               | Risk                    | Other | $\beta_{PSA}^2$ | $P_{PSA}$ | Original GWAS             |          | Bias Corrected <sup>3</sup> |                  |
|         |                |                               |                         |       |                 |           | OR                        | P        | OR <sub>adj</sub>           | P <sub>adj</sub> |
| 1p36.22 | 10561604       | rs6658216                     | T                       | C     | 0.005           | 0.20      | 1.05                      | 4.47E-08 | 1.04                        | 4.40E-05         |
| 1p36.13 | 16380393       | rs35708002                    | A                       | G     | 0.016           | 2.99E-03  | 1.06                      | 3.06E-08 | 1.04                        | 9.56E-04         |
| 1p22.3  | 88224230       | rs305423                      | T                       | C     | 0.032           | 1.55E-10  | 1.06                      | 2.80E-09 | 1.02                        | 0.062            |
| 1q21.3  | 150609429      | rs116173394                   | A                       | G     | -0.002          | 0.83      | 1.10                      | 1.72E-08 | 1.10                        | 6.79E-07         |
| 1q21.3  | 150868102      | rs78132593                    | A                       | C     | 0.007           | 0.13      | 1.08                      | 3.26E-16 | 1.07                        | 3.58E-10         |
| 1q21.3  | 150930926      | rs114908993                   | C                       | T     | -0.018          | 0.11      | 1.16                      | 3.49E-12 | 1.18                        | 1.57E-11         |
| 1q21.3  | 153923276      | rs10127983                    | T                       | C     | 0.013           | 2.38E-03  | 1.07                      | 1.38E-16 | 1.05                        | 2.31E-08         |
| 1q21.3  | 154980351      | rs56103503                    | T                       | C     | 0.026           | 6.27E-08  | 1.07                      | 3.16E-17 | 1.04                        | 2.27E-04         |
| 1q22    | 155552910      | rs61812109                    | G                       | A     | 0.037           | 3.04E-03  | 1.23                      | 9.04E-12 | 1.18                        | 9.09E-07         |
| 1q22    | 155668846      | rs190811727                   | G                       | A     | -0.003          | 0.85      | 1.17                      | 1.54E-08 | 1.18                        | 3.25E-07         |
| 1q32.1  | 204029748      | rs4593892                     | T                       | C     | 0.000           | 0.99      | 1.05                      | 5.38E-10 | 1.05                        | 8.19E-08         |
| 1q32.1  | 204518842      | rs4245739                     | A                       | C     | 0.014           | 1.39E-03  | 1.09                      | 2.61E-26 | 1.08                        | 1.97E-14         |
| 1q32.1  | 205738302      | rs823137                      | G                       | A     | 0.012           | 1.20E-03  | 1.05                      | 3.84E-09 | 1.03                        | 4.87E-04         |
| 2p25.1  | 8597123        | rs62106670                    | T                       | C     | -0.005          | 0.31      | 1.05                      | 5.98E-09 | 1.06                        | 8.34E-08         |
| 2p25.1  | 10094526       | rs73913932                    | G                       | A     | -0.004          | 0.58      | 1.09                      | 2.14E-09 | 1.09                        | 4.52E-08         |
| 2p25.1  | 10781975       | rs1990613                     | T                       | C     | 0.003           | 0.49      | 1.07                      | 1.87E-19 | 1.07                        | 7.87E-14         |
| 2p24.3  | 16024757       | rs12611818                    | T                       | G     | 0.001           | 0.78      | 1.05                      | 1.01E-08 | 1.05                        | 8.64E-07         |
| 2p24.1  | 20878105       | rs9306894                     | G                       | A     | 0.030           | 1.53E-14  | 1.08                      | 1.21E-21 | 1.04                        | 1.25E-05         |
| 2p21    | 43148487       | rs4952948                     | G                       | A     | 0.010           | 0.015     | 1.04                      | 2.86E-08 | 1.03                        | 3.32E-04         |
| 2p21    | 43637998       | rs7591218                     | A                       | G     | 0.015           | 3.45E-04  | 1.08                      | 2.54E-24 | 1.07                        | 3.54E-12         |
| 2p15    | 62792689       | rs13008096                    | A                       | C     | 0.001           | 0.84      | 1.05                      | 2.51E-11 | 1.05                        | 1.51E-08         |
| 2p15    | 63301164       | rs6545977                     | G                       | A     | 0.026           | 4.25E-12  | 1.12                      | 7.06E-50 | 1.08                        | 8.93E-21         |
| 2p15    | 63982690       | rs72808211                    | G                       | A     | 0.016           | 0.11      | 1.15                      | 2.85E-11 | 1.12                        | 3.80E-07         |
| 2p14    | 66652885       | rs74702681                    | T                       | C     | 0.010           | 0.45      | 1.17                      | 9.89E-11 | 1.16                        | 2.29E-07         |
| 2p11.2  | 85764960       | rs1446668                     | G                       | T     | -0.014          | 3.95E-04  | 1.09                      | 2.51E-28 | 1.10                        | 6.18E-30         |
| 2q13    | 111893096      | rs11691517                    | T                       | G     | 0.007           | 0.10      | 1.07                      | 1.33E-13 | 1.06                        | 2.73E-08         |
| 2q13    | 111906762      | rs1877330                     | A                       | C     | 0.004           | 0.60      | 1.11                      | 6.85E-12 | 1.10                        | 1.32E-08         |
| 2q31.1  | 173287607      | rs11686909                    | G                       | A     | 0.001           | 0.80      | 1.05                      | 4.66E-10 | 1.05                        | 1.48E-07         |
| 2q31.1  | 173303031      | rs28485589                    | A                       | G     | 0.019           | 0.020     | 1.27                      | 5.01E-48 | 1.25                        | 2.56E-31         |
| 2q33.1  | 202126615      | rs1861270                     | G                       | A     | 0.005           | 0.28      | 1.05                      | 2.81E-09 | 1.05                        | 3.53E-06         |
| 2q33.3  | 208118301      | rs12621900                    | C                       | T     | 0.006           | 0.17      | 1.05                      | 3.45E-08 | 1.05                        | 2.69E-05         |
| 2q37.3  | 238440449      | rs11891348                    | G                       | T     | 0.014           | 2.04E-03  | 1.07                      | 2.39E-13 | 1.05                        | 2.39E-06         |
| 2q37.3  | 242135265      | rs77559646                    | A                       | G     | 0.047           | 4.96E-04  | 1.27                      | 1.59E-21 | 1.21                        | 2.64E-10         |

|         |           |             |   |   |        |          |      |          |      |          |
|---------|-----------|-------------|---|---|--------|----------|------|----------|------|----------|
| 2q37.3  | 242139600 | rs77482050  | G | A | 0.057  | 0.012    | 1.48 | 1.45E-22 | 1.39 | 6.61E-12 |
| 2q37.3  | 242157241 | rs76832527  | A | G | 0.007  | 0.16     | 1.10 | 5.00E-22 | 1.09 | 3.18E-14 |
| 3p24.3  | 23153062  | rs7618603   | A | C | 0.019  | 1.15E-04 | 1.06 | 3.08E-08 | 1.03 | 3.69E-03 |
| 3p21.31 | 49626306  | rs6446285   | G | A | 0.005  | 0.30     | 1.06 | 1.12E-08 | 1.05 | 1.06E-05 |
| 3p14.1  | 64920084  | rs55821157  | G | A | 0.010  | 0.24     | 1.11 | 6.87E-09 | 1.10 | 7.07E-06 |
| 3p13    | 70874997  | rs7622519   | G | A | 0.017  | 7.72E-06 | 1.04 | 2.46E-08 | 1.02 | 7.87E-03 |
| 3p12.1  | 87184311  | rs6770433   | T | C | 0.005  | 0.16     | 1.12 | 1.32E-50 | 1.11 | 1.94E-34 |
| 3p11.2  | 87395326  | rs114423020 | G | A | 0.014  | 0.19     | 1.16 | 4.41E-13 | 1.14 | 1.88E-08 |
| 3q13.12 | 106962305 | rs1283105   | G | C | 0.000  | 0.94     | 1.05 | 3.71E-11 | 1.05 | 1.34E-08 |
| 3q13.2  | 113290450 | rs13092681  | T | C | 0.023  | 1.15E-09 | 1.09 | 2.24E-29 | 1.06 | 2.12E-11 |
| 3q21.3  | 127898501 | rs2811476   | C | A | 0.024  | 1.79E-08 | 1.10 | 4.59E-32 | 1.07 | 4.23E-13 |
| 3q21.3  | 128275459 | rs4857906   | C | T | 0.010  | 0.036    | 1.06 | 2.74E-11 | 1.05 | 2.59E-06 |
| 3q23    | 141140968 | rs9846396   | T | C | 0.030  | 4.68E-15 | 1.05 | 2.91E-10 | 1.01 | 0.13     |
| 3q25.1  | 152004202 | rs182314334 | T | C | -0.013 | 0.075    | 1.09 | 1.08E-11 | 1.11 | 3.05E-11 |
| 3q26.2  | 170074517 | rs78416326  | G | C | 0.017  | 4.31E-04 | 1.18 | 4.06E-68 | 1.16 | 3.40E-41 |
| 4q13.3  | 74326647  | rs113573136 | T | C | 0.005  | 0.49     | 1.06 | 2.50E-10 | 1.05 | 2.78E-05 |
| 4q13.3  | 74442349  | rs17804499  | G | C | 0.016  | 0.047    | 1.17 | 9.68E-19 | 1.15 | 4.02E-12 |
| 4q22.3  | 95547467  | rs7679542   | A | G | 0.006  | 0.11     | 1.09 | 5.03E-27 | 1.08 | 1.84E-17 |
| 4q24    | 106065308 | rs10007915  | C | G | 0.011  | 5.96E-03 | 1.13 | 5.22E-55 | 1.11 | 7.46E-34 |
| 4q31.1  | 140915940 | rs13148756  | T | G | -0.006 | 0.35     | 1.05 | 4.50E-08 | 1.06 | 2.23E-06 |
| 5p15.33 | 1228166   | rs114674839 | T | C | 0.043  | 1.10E-05 | 1.12 | 3.78E-09 | 1.07 | 3.78E-03 |
| 5p15.33 | 1272074   | rs138895564 | T | C | 0.101  | 7.29E-06 | 1.27 | 1.75E-08 | 1.13 | 0.013    |
| 5p15.33 | 1280028   | rs2242652   | G | A | 0.011  | 0.031    | 1.16 | 5.75E-51 | 1.15 | 6.29E-33 |
| 5p15.33 | 1292118   | rs71595003  | A | G | -0.023 | 0.059    | 1.19 | 1.73E-15 | 1.22 | 1.00E-14 |
| 5p15.33 | 1895829   | rs12653946  | T | C | 0.010  | 9.17E-03 | 1.08 | 2.57E-22 | 1.07 | 1.24E-12 |
| 5q31.1  | 133836209 | rs10793821  | T | C | 0.005  | 0.17     | 1.06 | 2.26E-14 | 1.05 | 2.54E-09 |
| 5q35.2  | 172959030 | rs9686557   | C | A | 0.016  | 2.42E-05 | 1.04 | 4.69E-09 | 1.03 | 3.03E-03 |
| 5q35.3  | 177891551 | rs2672843   | G | A | 0.006  | 0.15     | 1.05 | 4.19E-09 | 1.04 | 1.08E-05 |
| 6p24.2  | 11217897  | rs2018336   | T | C | 0.012  | 6.10E-03 | 1.07 | 1.51E-12 | 1.05 | 1.61E-06 |
| 6p22.3  | 22314766  | rs112292679 | C | T | -0.001 | 0.93     | 1.11 | 2.02E-08 | 1.11 | 8.66E-07 |
| 6p21.33 | 30611676  | rs1140809   | C | A | 0.011  | 4.85E-03 | 1.05 | 1.01E-09 | 1.03 | 1.27E-04 |
| 6p21.33 | 31329386  | rs2596546   | A | G | 0.019  | 2.58E-06 | 1.07 | 4.71E-16 | 1.04 | 4.07E-06 |
| 6p21.32 | 32604795  | rs9272390   | T | C | 0.007  | 0.22     | 1.06 | 1.62E-11 | 1.06 | 1.27E-06 |
| 6p21.31 | 34793124  | rs9469899   | A | G | 0.022  | 1.34E-08 | 1.05 | 1.64E-09 | 1.02 | 0.017    |
| 6p21.1  | 41538545  | rs913074    | C | T | 0.010  | 0.046    | 1.09 | 3.68E-24 | 1.07 | 2.22E-12 |
| 6q14.1  | 76479489  | rs6907476   | T | C | 0.009  | 0.093    | 1.06 | 6.51E-09 | 1.05 | 3.06E-05 |
| 6q21    | 109295293 | rs2038542   | C | T | 0.005  | 0.41     | 1.08 | 5.49E-13 | 1.07 | 7.33E-09 |
| 6q22.1  | 117200434 | rs339351    | C | A | 0.011  | 7.84E-03 | 1.09 | 2.48E-27 | 1.08 | 7.00E-16 |
| 6q23.2  | 134300641 | rs6919121   | T | C | 0.007  | 0.061    | 1.05 | 4.04E-09 | 1.04 | 1.74E-05 |
| 6q25.2  | 153430868 | rs63739861  | A | C | 0.002  | 0.60     | 1.08 | 5.55E-22 | 1.07 | 4.99E-16 |

|         |           |             |   |   |        |          |      |           |      |           |
|---------|-----------|-------------|---|---|--------|----------|------|-----------|------|-----------|
| 6q25.3  | 160184600 | rs144384356 | G | A | 0.018  | 0.071    | 1.13 | 2.31E-10  | 1.11 | 5.70E-06  |
| 6q25.3  | 160255934 | rs73030808  | A | G | 0.014  | 0.011    | 1.08 | 1.52E-12  | 1.06 | 1.42E-06  |
| 6q25.3  | 160560845 | rs628031    | A | G | 0.004  | 0.32     | 1.07 | 2.83E-19  | 1.07 | 3.20E-13  |
| 6q25.3  | 160584693 | rs7749378   | A | G | 0.013  | 0.26     | 1.14 | 4.28E-09  | 1.12 | 6.86E-06  |
| 6q25.3  | 160584841 | rs116910573 | G | A | 0.000  | 0.97     | 1.13 | 8.54E-10  | 1.13 | 9.59E-08  |
| 6q25.3  | 160628128 | rs117648937 | C | T | 0.000  | 0.99     | 1.29 | 1.47E-11  | 1.29 | 3.68E-09  |
| 6q25.3  | 160822675 | rs3105751   | G | A | 0.018  | 2.33E-05 | 1.11 | 6.02E-39  | 1.09 | 1.76E-19  |
| 7p21.1  | 20444081  | rs6973059   | T | C | -0.001 | 0.76     | 1.05 | 8.67E-09  | 1.05 | 2.85E-07  |
| 7p15.3  | 20999211  | rs9655205   | C | A | 0.028  | 4.43E-07 | 1.09 | 2.22E-24  | 1.06 | 7.46E-08  |
| 7p15.3  | 21800369  | rs10281087  | T | G | 0.014  | 3.53E-04 | 1.04 | 2.38E-08  | 1.03 | 2.39E-03  |
| 7p15.2  | 27220831  | rs6461992   | G | A | 0.006  | 0.43     | 1.09 | 7.43E-10  | 1.09 | 9.08E-07  |
| 7p15.2  | 27976563  | rs10486567  | G | A | 0.049  | 2.42E-28 | 1.15 | 2.48E-53  | 1.08 | 4.91E-15  |
| 7p14.1  | 40875192  | rs17621345  | A | C | 0.021  | 1.91E-06 | 1.07 | 1.96E-14  | 1.05 | 1.19E-05  |
| 7p12.3  | 47482829  | rs4724578   | C | A | 0.002  | 0.61     | 1.06 | 2.40E-13  | 1.05 | 1.11E-09  |
| 7p12.3  | 47506994  | rs2964944   | C | T | 0.015  | 3.93E-04 | 1.05 | 2.61E-08  | 1.03 | 1.44E-03  |
| 7p12.3  | 47627603  | rs112289173 | C | T | 0.002  | 0.67     | 1.07 | 4.13E-08  | 1.07 | 3.19E-06  |
| 7q21.3  | 97688440  | rs4727386   | A | G | 0.015  | 1.11E-03 | 1.10 | 6.50E-40  | 1.09 | 1.10E-19  |
| 8p21.3  | 22879734  | rs4871844   | T | C | 0.020  | 5.87E-05 | 1.04 | 4.75E-08  | 1.02 | 0.029     |
| 8p21.2  | 23443320  | rs11996109  | C | A | 0.045  | 1.93E-13 | 1.06 | 1.14E-13  | 1.00 | 0.63      |
| 8p21.2  | 23533623  | rs11135766  | C | T | 0.069  | 2.27E-72 | 1.14 | 4.17E-69  | 1.05 | 1.39E-09  |
| 8p21.2  | 25892142  | rs11135910  | T | C | 0.006  | 0.24     | 1.08 | 2.23E-13  | 1.07 | 6.73E-09  |
| 8q24.21 | 127855936 | rs4870985   | T | C | -0.009 | 0.036    | 1.08 | 1.88E-24  | 1.09 | 6.26E-22  |
| 8q24.21 | 127906604 | rs13282012  | G | A | -0.004 | 0.27     | 1.10 | 2.92E-39  | 1.11 | 9.19E-33  |
| 8q24.21 | 128018466 | rs73351629  | C | G | 0.009  | 0.020    | 1.15 | 9.42E-69  | 1.14 | 6.91E-45  |
| 8q24.21 | 128077146 | rs77541621  | A | G | 0.048  | 2.05E-04 | 1.83 | 1.13E-174 | 1.73 | 1.16E-98  |
| 8q24.21 | 128103979 | rs5013678   | T | C | 0.009  | 0.047    | 1.20 | 1.87E-79  | 1.18 | 1.07E-54  |
| 8q24.21 | 128108418 | rs111724742 | G | T | 0.039  | 0.066    | 1.61 | 3.15E-43  | 1.54 | 6.87E-25  |
| 8q24.21 | 128117736 | rs143368544 | T | C | 0.050  | 2.51E-04 | 1.25 | 2.48E-17  | 1.18 | 5.35E-08  |
| 8q24.21 | 128151672 | rs17446776  | G | C | 0.007  | 0.58     | 1.25 | 9.43E-22  | 1.24 | 2.48E-15  |
| 8q24.21 | 128228233 | rs79125478  | T | C | 0.006  | 0.52     | 1.11 | 1.18E-11  | 1.10 | 2.66E-07  |
| 8q24.21 | 128294091 | rs283713    | G | T | 0.009  | 0.16     | 1.09 | 1.64E-12  | 1.08 | 8.84E-08  |
| 8q24.21 | 128324147 | rs382434    | C | T | 0.036  | 1.98E-14 | 1.15 | 1.80E-72  | 1.11 | 6.24E-26  |
| 8q24.21 | 128376862 | rs117627785 | T | C | 0.040  | 5.35E-03 | 1.23 | 1.36E-13  | 1.18 | 6.42E-07  |
| 8q24.21 | 128413305 | rs6983267   | G | T | 0.052  | 1.49E-42 | 1.23 | 2.84E-164 | 1.15 | 3.71E-63  |
| 8q24.21 | 128514011 | rs74592433  | T | C | 0.020  | 0.13     | 1.23 | 8.17E-10  | 1.20 | 6.44E-07  |
| 8q24.21 | 128532137 | rs10090154  | T | C | 0.012  | 0.055    | 1.44 | 4.15E-225 | 1.42 | 4.10E-146 |
| 8q24.21 | 128582965 | rs73709253  | G | A | 0.013  | 0.30     | 1.14 | 8.74E-09  | 1.13 | 8.58E-06  |
| 9p22.1  | 18556233  | rs951227    | A | G | 0.001  | 0.80     | 1.05 | 6.68E-10  | 1.05 | 1.84E-07  |
| 9p22.1  | 19055965  | rs1048169   | C | T | 0.007  | 0.085    | 1.06 | 2.81E-14  | 1.05 | 1.19E-08  |
| 9p21.3  | 22041998  | rs17694493  | G | C | -0.001 | 0.88     | 1.08 | 3.37E-13  | 1.08 | 2.27E-10  |

|          |           |             |   |   |        |          |      |           |      |          |
|----------|-----------|-------------|---|---|--------|----------|------|-----------|------|----------|
| 9p13.3   | 33935073  | rs307651    | A | C | 0.010  | 0.010    | 1.05 | 3.24E-11  | 1.04 | 9.30E-06 |
| 9q21.31  | 82087596  | rs9314679   | T | A | -0.011 | 0.052    | 1.07 | 1.02E-08  | 1.08 | 2.88E-09 |
| 9q31.2   | 110290217 | rs143655302 | G | A | 0.064  | 5.48E-06 | 1.27 | 2.29E-14  | 1.18 | 2.63E-06 |
| 9q34.11  | 132576060 | rs1182      | A | C | 0.006  | 0.23     | 1.06 | 5.65E-11  | 1.05 | 4.42E-07 |
| 10p15.3  | 890714    | rs34318754  | A | G | 0.014  | 5.99E-03 | 1.08 | 9.23E-13  | 1.06 | 1.17E-06 |
| 10q11.21 | 45854778  | rs11511618  | G | A | 0.023  | 2.58E-06 | 1.06 | 1.66E-10  | 1.04 | 1.22E-03 |
| 10q11.22 | 47671874  | rs34583261  | C | T | 0.019  | 0.11     | 1.09 | 3.52E-08  | 1.06 | 2.55E-03 |
| 10q11.23 | 51549496  | rs10993994  | T | C | 0.085  | 2.66E-76 | 1.23 | 9.11E-165 | 1.11 | 2.35E-32 |
| 10q23.31 | 90195149  | rs1935581   | C | T | -0.006 | 0.12     | 1.05 | 6.36E-09  | 1.05 | 6.85E-09 |
| 10q24.32 | 104408272 | rs12241712  | C | A | 0.015  | 2.86E-04 | 1.07 | 5.24E-18  | 1.06 | 1.35E-08 |
| 10q25.2  | 114715598 | rs2104598   | A | G | 0.007  | 0.069    | 1.05 | 3.70E-09  | 1.04 | 2.68E-05 |
| 10q26.12 | 122787452 | rs12245671  | G | A | 0.001  | 0.81     | 1.06 | 7.05E-14  | 1.06 | 2.13E-10 |
| 10q26.12 | 123034391 | rs4468286   | C | A | -0.086 | 1.82E-89 | 1.06 | 2.08E-10  | 1.17 | 1.02E-53 |
| 10q26.13 | 123190200 | rs17101982  | C | G | 0.101  | 1.19E-31 | 1.11 | 5.40E-09  | 0.99 | 0.48     |
| 10q26.13 | 126697114 | rs4962419   | A | G | 0.021  | 6.08E-07 | 1.06 | 3.19E-11  | 1.03 | 1.23E-03 |
| 11p15.5  | 1507512   | rs1881502   | T | C | 0.003  | 0.54     | 1.06 | 3.04E-09  | 1.05 | 1.37E-06 |
| 11p15.5  | 2233797   | rs10840603  | A | G | 0.018  | 2.61E-04 | 1.18 | 1.04E-68  | 1.15 | 1.06E-38 |
| 11p15.4  | 7547587   | rs61890184  | A | G | -0.004 | 0.45     | 1.08 | 2.73E-10  | 1.08 | 6.35E-09 |
| 11q12.3  | 61908440  | rs2277283   | C | T | 0.006  | 0.12     | 1.05 | 1.61E-10  | 1.05 | 1.34E-06 |
| 11q13.2  | 66951965  | rs12785905  | C | G | 0.015  | 0.075    | 1.12 | 5.10E-10  | 1.10 | 3.32E-06 |
| 11q13.3  | 68912221  | rs3018667   | G | A | -0.001 | 0.90     | 1.06 | 5.04E-15  | 1.06 | 7.74E-12 |
| 11q13.3  | 68981359  | rs12275055  | G | A | 0.015  | 3.49E-03 | 1.25 | 2.76E-111 | 1.23 | 2.00E-70 |
| 11q13.3  | 69071624  | rs11228619  | G | A | 0.012  | 0.14     | 1.10 | 5.33E-10  | 1.09 | 5.79E-06 |
| 11q13.3  | 69456000  | rs55911137  | C | G | 0.030  | 0.014    | 1.20 | 4.32E-14  | 1.16 | 1.25E-07 |
| 11q13.5  | 76251818  | rs17749618  | A | G | 0.021  | 2.32E-07 | 1.06 | 8.08E-13  | 1.03 | 3.02E-04 |
| 11q22.2  | 102396607 | rs12285347  | T | C | -0.039 | 6.15E-25 | 1.08 | 4.01E-21  | 1.12 | 5.79E-40 |
| 11q22.3  | 108357137 | rs74911261  | A | G | 0.037  | 1.95E-03 | 1.15 | 1.05E-08  | 1.11 | 3.98E-04 |
| 11q23.2  | 113807181 | rs11214775  | G | A | 0.008  | 0.063    | 1.07 | 1.88E-16  | 1.06 | 3.21E-10 |
| 11q24.2  | 125144426 | rs117015177 | G | A | 0.058  | 2.38E-04 | 1.20 | 1.69E-08  | 1.13 | 1.40E-03 |
| 11q25    | 134266372 | rs878987    | G | A | -0.002 | 0.68     | 1.07 | 1.87E-10  | 1.07 | 7.37E-09 |
| 12p13.1  | 12871099  | rs2066827   | T | G | 0.011  | 0.040    | 1.05 | 4.42E-09  | 1.04 | 1.64E-04 |
| 12p13.1  | 14416918  | rs10845938  | G | A | 0.001  | 0.74     | 1.06 | 2.60E-15  | 1.06 | 2.19E-11 |
| 12q13.11 | 48419618  | rs80130819  | A | C | -0.004 | 0.52     | 1.10 | 1.05E-11  | 1.10 | 5.71E-10 |
| 12q13.12 | 49676010  | rs10875943  | C | T | 0.000  | 0.99     | 1.08 | 1.49E-19  | 1.08 | 9.20E-15 |
| 12q13.13 | 53312612  | rs73110464  | T | C | 0.009  | 0.13     | 1.18 | 4.82E-51  | 1.17 | 3.95E-33 |
| 12q14.2  | 65012824  | rs7968403   | T | C | -0.003 | 0.52     | 1.06 | 7.22E-14  | 1.06 | 1.05E-11 |
| 12q21.33 | 90192866  | rs4842503   | G | A | 0.004  | 0.39     | 1.06 | 3.78E-12  | 1.05 | 2.60E-08 |
| 12q24.21 | 114666202 | rs10774740  | G | T | 0.013  | 1.36E-03 | 1.08 | 3.77E-22  | 1.06 | 1.23E-11 |
| 12q24.33 | 133067989 | rs7295014   | G | A | 0.015  | 4.68E-04 | 1.05 | 1.69E-09  | 1.03 | 8.67E-04 |
| 13q22.1  | 73719777  | rs9543236   | T | C | 0.012  | 0.015    | 1.07 | 1.55E-11  | 1.05 | 2.59E-06 |

|          |          |             |   |   |         |          |      |           |      |          |
|----------|----------|-------------|---|---|---------|----------|------|-----------|------|----------|
| 13q22.1  | 73995877 | rs7336001   | G | C | 0.038   | 5.88E-08 | 1.10 | 2.27E-11  | 1.06 | 1.07E-03 |
| 14q11.2  | 23305649 | rs1004030   | T | C | 0.006   | 0.15     | 1.05 | 8.17E-10  | 1.04 | 4.31E-06 |
| 14q13.3  | 37137280 | rs12893199  | C | T | 0.007   | 0.072    | 1.06 | 4.27E-13  | 1.05 | 8.33E-08 |
| 14q22.1  | 53375302 | rs7141054   | A | C | 0.011   | 0.023    | 1.09 | 6.27E-18  | 1.07 | 2.00E-10 |
| 14q24.1  | 69027523 | rs34882439  | G | A | 0.004   | 0.31     | 1.06 | 1.11E-10  | 1.05 | 3.93E-07 |
| 14q24.1  | 69134264 | rs767127    | G | A | 0.003   | 0.52     | 1.05 | 2.69E-12  | 1.05 | 1.03E-08 |
| 14q24.2  | 71091142 | rs11158871  | C | T | -0.003  | 0.40     | 1.05 | 1.23E-08  | 1.05 | 7.15E-08 |
| 15q13.3  | 33417586 | rs1902149   | G | A | -0.004  | 0.32     | 1.04 | 4.84E-08  | 1.05 | 1.97E-07 |
| 15q15.1  | 40922915 | rs4924487   | C | G | 0.015   | 3.18E-03 | 1.07 | 3.03E-10  | 1.05 | 7.48E-05 |
| 15q21.3  | 56385868 | rs33984059  | A | G | -0.008  | 0.51     | 1.19 | 1.62E-09  | 1.20 | 1.16E-08 |
| 15q22.31 | 66705043 | rs80326387  | A | G | 0.004   | 0.35     | 1.05 | 2.13E-09  | 1.05 | 2.16E-06 |
| 16q12.2  | 54473072 | rs1420285   | C | T | 0.006   | 0.13     | 1.05 | 1.47E-08  | 1.04 | 2.82E-05 |
| 16q21    | 57654576 | rs11863709  | C | T | -0.002  | 0.86     | 1.15 | 1.43E-11  | 1.16 | 2.40E-09 |
| 16q21    | 57693055 | rs16958674  | C | T | 0.013   | 0.011    | 1.06 | 2.14E-09  | 1.04 | 1.75E-04 |
| 16q23.3  | 82166181 | rs8052913   | C | T | 0.017   | 1.27E-05 | 1.04 | 3.71E-08  | 1.02 | 0.011    |
| 17p13.3  | 618965   | rs684232    | C | T | 0.008   | 0.053    | 1.09 | 1.77E-26  | 1.08 | 2.26E-16 |
| 17p13.1  | 7571752  | rs78378222  | G | T | 0.112   | 4.08E-10 | 1.25 | 4.78E-11  | 1.10 | 0.013    |
| 17p13.1  | 7803118  | rs28441558  | C | T | 0.042   | 3.34E-07 | 1.16 | 3.51E-19  | 1.11 | 1.05E-07 |
| 17q11.2  | 30098749 | rs142444269 | C | T | 0.010   | 0.096    | 1.07 | 1.45E-11  | 1.06 | 2.18E-06 |
| 17q12    | 36047417 | rs3110641   | A | G | 0.011   | 0.025    | 1.07 | 1.24E-12  | 1.05 | 8.73E-07 |
| 17q12    | 36074979 | rs11649743  | G | A | 0.014   | 3.21E-03 | 1.13 | 7.16E-38  | 1.11 | 2.58E-22 |
| 17q12    | 36103565 | rs11263763  | A | G | 0.049   | 3.13E-38 | 1.23 | 3.63E-162 | 1.16 | 5.06E-65 |
| 17q12    | 36229129 | rs8081051   | A | C | 0.007   | 0.22     | 1.05 | 1.35E-08  | 1.04 | 9.01E-05 |
| 17q21.32 | 45993959 | rs199905768 | A | C | 0.020   | 0.51     | 1.19 | 3.79E-09  | 1.17 | 8.14E-04 |
| 17q21.32 | 46546346 | rs12944450  | T | C | -0.025  | 0.18     | 1.14 | 7.44E-09  | 1.17 | 3.14E-07 |
| 17q21.32 | 46820676 | rs117576373 | T | C | 0.009   | 0.34     | 1.21 | 4.88E-24  | 1.20 | 8.71E-17 |
| 17q21.33 | 47451749 | rs9893373   | G | A | -0.003  | 0.58     | 1.05 | 1.93E-08  | 1.05 | 5.65E-07 |
| 17q21.33 | 47455752 | rs73324348  | A | G | 0.011   | 0.13     | 1.11 | 5.81E-14  | 1.10 | 8.02E-09 |
| 17q22    | 56456120 | rs2680708   | G | A | 0.014   | 3.57E-04 | 1.05 | 5.64E-09  | 1.03 | 1.07E-03 |
| 17q24.3  | 69115358 | rs9911515   | A | G | 0.002   | 0.53     | 1.17 | 7.26E-100 | 1.17 | 8.68E-73 |
| 18q21.2  | 51771322 | rs8089411   | C | T | 0.015   | 6.59E-05 | 1.04 | 1.98E-08  | 1.03 | 3.83E-03 |
| 18q21.2  | 53230859 | rs28607662  | C | T | 0.010   | 0.14     | 1.07 | 2.68E-08  | 1.06 | 5.14E-05 |
| 18q21.32 | 56744666 | rs12327532  | G | T | 0.013   | 1.70E-03 | 1.04 | 4.38E-08  | 1.03 | 1.66E-03 |
| 18q21.33 | 60998567 | rs2850766   | C | G | -0.004  | 0.53     | 1.05 | 3.83E-08  | 1.05 | 6.16E-06 |
| 18q22.3  | 73036165 | rs10460109  | T | C | 0.001   | 0.78     | 1.04 | 1.56E-08  | 1.04 | 1.85E-06 |
| 18q23    | 76770820 | rs9959454   | A | G | 0.025   | 3.29E-09 | 1.08 | 7.09E-22  | 1.05 | 9.76E-08 |
| 19p13.11 | 17214073 | rs11666569  | C | T | 0.009   | 0.033    | 1.05 | 3.61E-09  | 1.04 | 4.23E-05 |
| 19q13.13 | 38555154 | rs35486025  | T | C | -0.0004 | 0.94     | 1.06 | 8.95E-10  | 1.06 | 7.83E-08 |
| 19q13.2  | 38744733 | rs12610267  | A | G | 0.010   | 0.010    | 1.10 | 1.24E-36  | 1.09 | 5.04E-22 |
| 19q13.2  | 41985931 | rs11673591  | T | A | -0.005  | 0.28     | 1.09 | 1.32E-23  | 1.10 | 2.88E-20 |

|          |          |             |   |   |        |          |      |          |      |          |
|----------|----------|-------------|---|---|--------|----------|------|----------|------|----------|
| 19q13.33 | 51340794 | rs2659053   | A | G | 0.082  | 4.35E-92 | 1.06 | 9.76E-15 | 0.97 | 2.37E-04 |
| 19q13.33 | 51362715 | rs76765083  | T | G | 0.366  | 6.0E-604 | 1.35 | 4.99E-90 | 0.89 | 7.21E-12 |
| 20q11.22 | 34003073 | rs142570322 | C | T | 0.023  | 3.49E-04 | 1.04 | 2.60E-08 | 1.02 | 0.096    |
| 20q13.13 | 49548807 | rs73909841  | T | C | 0.019  | 8.71E-03 | 1.11 | 3.28E-12 | 1.08 | 1.88E-06 |
| 20q13.2  | 52455205 | rs6091758   | G | A | 0.009  | 0.15     | 1.07 | 1.59E-17 | 1.06 | 1.09E-07 |
| 20q13.33 | 61015240 | rs34585497  | A | C | 0.015  | 4.87E-04 | 1.04 | 2.05E-08 | 1.03 | 3.30E-03 |
| 20q13.33 | 62272248 | rs2259797   | T | C | 0.025  | 5.78E-04 | 1.08 | 1.74E-08 | 1.05 | 1.77E-03 |
| 20q13.33 | 62310240 | rs62207046  | C | A | 0.007  | 0.41     | 1.09 | 3.73E-09 | 1.08 | 2.23E-05 |
| 20q13.33 | 62374389 | rs1058319   | C | T | 0.016  | 5.10E-03 | 1.12 | 1.82E-23 | 1.10 | 1.74E-13 |
| 21q22.3  | 42866332 | rs61735792  | A | G | 0.006  | 0.75     | 1.26 | 6.95E-14 | 1.26 | 9.43E-10 |
| 21q22.3  | 42889410 | rs112714648 | A | G | -0.002 | 0.67     | 1.06 | 1.66E-13 | 1.07 | 3.41E-11 |
| 22q11.21 | 19749525 | rs1978060   | G | A | 0.009  | 0.080    | 1.06 | 1.05E-11 | 1.04 | 1.26E-05 |
| 22q12.1  | 28888939 | rs9625483   | A | G | 0.023  | 0.087    | 1.14 | 3.82E-09 | 1.11 | 7.42E-05 |
| 22q13.1  | 40499103 | rs34419824  | T | A | 0.001  | 0.80     | 1.08 | 2.54E-15 | 1.07 | 2.41E-11 |
| 22q13.2  | 43500212 | rs5759167   | G | T | 0.007  | 0.058    | 1.15 | 3.38E-78 | 1.14 | 4.15E-53 |
| 22q13.2  | 43502152 | rs2007886   | T | C | 0.016  | 0.011    | 1.10 | 2.51E-14 | 1.08 | 4.48E-08 |

<sup>1</sup> Index variants were selected using LD-based clumping:  $r^2 < 0.01$  within  $\pm 10$  Mb

<sup>2</sup> Per allele change in log(PSA)

<sup>3</sup> Bias-corrected estimated were obtained as follows:  $\beta^{adj} = \beta - b * \beta_{PSA}$  and the corresponding  $OR^{adj} = \exp(\beta^{adj})$

**Supplementary Table 11:** Associations between the PSA polygenic score ( $PGS_{PSA}$ ) comprised of 128 variants and the 269-variant prostate cancer genetic risk score ( $PGS_{269}$ ), as described in Conti & Darst et al. (2021). Associations were estimated in a subset of European ancestry UK Biobank (UKB) participants excluded from the PSA GWAS. Estimates are compared between  $PGS_{269}$  fit using original risk allele weights and re-fit using weights corrected for index event bias ( $PGS_{269}^{adj}$ ).

| UKB Sample | N       | Original weights |          |                         | Bias-corrected weights |          |                         |
|------------|---------|------------------|----------|-------------------------|------------------------|----------|-------------------------|
|            |         | $\beta^1$        | (SE)     | P                       | $\beta^2$              | (SE)     | P                       |
| Combined   | 164,452 | 0.2860           | (0.0023) | $<10^{-700}$            | 0.0584                 | (0.0025) | $3.20 \times 10^{-124}$ |
| Cases      | 11,568  | 0.2445           | (0.0088) | $4.16 \times 10^{-163}$ | 0.0397                 | (0.0091) | $1.18 \times 10^{-5}$   |
| Controls   | 152,884 | 0.2833           | (0.0025) | $<10^{-700}$            | 0.0468                 | (0.0026) | $6.08 \times 10^{-73}$  |

- <sup>1</sup> Effect of a standard deviation increase of  $PGS_{269}$  on  $PGS_{PSA}$ , estimated using a linear regression model with adjustment genetic ancestry principal components and genotyping array
- <sup>2</sup> Effect of a standard deviation increase of  $PGS_{269}^{adj}$ , fit using bias-corrected risk allele weights, on  $PGS_{PSA}$ , estimated using a linear regression model with adjustment for the top 10 genetic ancestry principal components and genotyping array

**Supplementary Table 12:** Associations with prostate cancer, overall and stratified by Gleason score, for the 269-variant prostate cancer genetic risk score (PGS<sub>269</sub>), as described in Conti & Darst et al. (2021), and a version of this score calculated with weights corrected for index event bias (PGS<sub>269</sub><sup>adj</sup>). Associations were estimated in Genetic Epidemiology Research in Adult Health and Aging (GERA) cases (n=3673) and controls (n=2363) of European ancestry who underwent a prostate biopsy.

|                  | Predictor                         | Association Estimates |               |                        |                  |                 |                               |
|------------------|-----------------------------------|-----------------------|---------------|------------------------|------------------|-----------------|-------------------------------|
|                  |                                   | OR <sup>1,2</sup>     | (95% CI)      | P                      | AUC <sup>3</sup> | (95% CI)        | P <sub>AUC</sub> <sup>4</sup> |
| All cases        | PGS <sub>269</sub>                | 2.71                  | (2.28 – 3.21) | 2.85×10 <sup>-30</sup> | 0.677            | (0.634 – 0.719) | 3.91×10 <sup>-3</sup>         |
|                  | PGS <sub>269</sub> <sup>adj</sup> | 3.63                  | (3.01 – 4.37) | 4.87×10 <sup>-42</sup> | 0.685            | (0.643 – 0.727) |                               |
| Gleason score <7 | PGS <sub>269</sub>                | 3.00                  | (2.49 – 3.61) | 1.42×10 <sup>-30</sup> | 0.680            | (0.629 – 0.731) | 0.064                         |
|                  | PGS <sub>269</sub> <sup>adj</sup> | 3.78                  | (3.09 – 4.63) | 5.08×10 <sup>-38</sup> | 0.686            | (0.635 – 0.736) |                               |
| Gleason score ≥7 | PGS <sub>269</sub>                | 2.36                  | (1.92 – 2.91) | 1.15×10 <sup>-15</sup> | 0.678            | (0.619 – 0.736) | 1.91×10 <sup>-3</sup>         |
|                  | PGS <sub>269</sub> <sup>adj</sup> | 3.58                  | (2.87 – 4.47) | 8.53×10 <sup>-30</sup> | 0.692            | (0.634 – 0.750) |                               |

<sup>1</sup> Odds ratios (OR) were estimated for a dichotomized PGS comparing the top decile to the rest

<sup>2</sup> Logistic regression models were adjusted for the top 10 genetic ancestry principal components and a combined variable for genotyping array and DNA collection kit (chip-kit)

<sup>3</sup> AUC estimates and bootstrapped confidence intervals were obtained using 10-fold cross-validation

<sup>4</sup> P-values based on paired Wilcoxon rank sum test comparing AUC distributions across 10 folds



**Supplementary Table 13:** Case-only associations with Gleason score PSA polygenic score (PGS<sub>PSA</sub>), the 269-variant prostate cancer genetic risk score (PGS<sub>269</sub>) as described in Conti & Darst et al. (2021) and the bias-corrected PGS<sub>269</sub><sup>adj</sup>. Associations were estimated in 4584 prostate cancer cases of European ancestry from the Genetic Epidemiology Research in Adult Health and Aging (GERA) cohort.

|                   | N    | (%)    | Predictor                         | Continuous PGS <sup>1,2</sup> |               |                        | Dichotomized PGS <sup>2,3</sup> |               |                       |
|-------------------|------|--------|-----------------------------------|-------------------------------|---------------|------------------------|---------------------------------|---------------|-----------------------|
|                   |      |        |                                   | OR                            | (95% CI)      | P                      | OR                              | (95% CI)      | P                     |
| Gleason score ≤6  | 2798 | (61.0) |                                   | 1.00                          | -             | -                      | 1.00                            | -             | -                     |
|                   |      |        | PGS <sub>PSA</sub>                | 0.80                          | (0.75 – 0.86) | 3.97×10 <sup>-10</sup> | 0.69                            | (0.56 – 0.85) | 3.94×10 <sup>-4</sup> |
| Gleason score = 7 | 1366 | (29.8) | PGS <sub>269</sub>                | 0.98                          | (0.91 – 1.05) | 0.52                   | 0.99                            | (0.85 – 1.17) | 0.94                  |
|                   |      |        | PGS <sub>269</sub> <sup>adj</sup> | 1.03                          | (0.97 – 1.11) | 0.35                   | 1.05                            | (0.86 – 1.23) | 0.58                  |
| Gleason score ≥8  | 420  | (9.2)  | PGS <sub>PSA</sub>                | 0.77                          | (0.69 – 0.86) | 4.45×10 <sup>-6</sup>  | 0.75                            | (0.53 – 1.05) | 0.095                 |
|                   |      |        | PGS <sub>269</sub>                | 0.87                          | (0.77 – 0.97) | 0.011                  | 0.72                            | (0.54 – 0.96) | 0.024                 |
|                   |      |        | PGS <sub>269</sub> <sup>adj</sup> | 0.95                          | (0.85 – 1.06) | 0.34                   | 0.93                            | (0.71 – 1.22) | 0.61                  |

<sup>1</sup> Each PGS was standardized to have a mean of 0 and standard deviation (SD) of 1 in the full GERA cohort, including cases and controls. Odds ratio (OR) were estimated per SD increase in PGS

<sup>2</sup> Associations were estimated using multinomial logistic regression with Gleason score as the outcome, operationalized as a three-level ordinal variable. Models for each PGS were adjusted for the top 10 genetic ancestry principal components and a combined variable for genotyping array and DNA collection kit

<sup>3</sup> Odds ratios (OR) were estimated for a dichotomized PGS comparing those in the top decile to the rest of the PGS distribution

**Supplementary Table 14:** Associations between the PSA polygenic score (PGS<sub>PSA</sub>) and baseline PSA in cancer-free participants from the Prostate Cancer Prevention Trial (PCPT) and Selenium and Vitamin E Cancer Prevention Trial (SELECT).

| Study  | Ancestry <sup>1</sup> | N      | Median Age | Variation (%) | PGS Associations           |          |                         |
|--------|-----------------------|--------|------------|---------------|----------------------------|----------|-------------------------|
|        |                       |        |            |               | $\beta_{\text{PGS}}^{2,3}$ | (SE)     | P                       |
| PCPT   | All                   | 5,883  | 63.0       | 7.16          | 0.1682                     | (0.0078) | $2.19 \times 10^{-98}$  |
|        | EUR                   | 5,725  | 63.0       | 7.33          | 0.1695                     | (0.0079) | $5.29 \times 10^{-98}$  |
|        | All                   | 25,917 | 62.0       | 7.99          | 0.2071                     | (0.0043) | $8.19 \times 10^{-503}$ |
|        | EUR                   | 22,173 | 62.0       | 8.78          | 0.2128                     | (0.0045) | $4.24 \times 10^{-478}$ |
| SELECT | AFR/EUR               | 1,763  | 62.0       | 3.32          | 0.1389                     | (0.0174) | $3.00 \times 10^{-15}$  |
|        | AFR                   | 1,173  | 62.0       | 3.45          | 0.1369                     | (0.0208) | $8.22 \times 10^{-11}$  |
|        | EAS                   | 257    | 62.0       | 2.45          | 0.1097                     | (0.0431) | 0.012                   |

<sup>1</sup> Individuals were assigned to a global ancestry cluster if their ancestry score exceeded 0.80 for a single group. Intermediate ancestry populations were designated to groups with an imputed ancestry score greater than 0.20 and less than 0.80.

<sup>2</sup> Effect of a standard deviation increase in the standardized PGS<sub>PSA</sub> on baseline log(PSA), adjusted for age at PSA measurement and the top 10 population-specific genetic ancestry principal components. For ancestry-specific analyses PGS<sub>PSA</sub> was standardized within each ancestry group.

<sup>3</sup> Global genetic ancestry proportions were included as additional adjustment covariates when all samples were analyzed together

**Supplementary Table 15:** Summary of re-classification for European ancestry prostate cancer cases and who underwent a biopsy in the Genetic Epidemiology Research in Adult Health and Aging (GERA) cohort. Re-classification of biopsy eligibility based on genetically corrected PSA values compared to observed PSA values is summarized with respect to age-specific PSA cut-points used to guide biopsy referral in the Kaiser Permanente health system.

|                         | PGS <sub>PSA</sub> <sup>1</sup> | PSA<br>(ng/mL) <sup>2</sup> | Re-classification Status |        |            |         |           |         | Total<br>N | NRI <sup>3</sup><br>(%) |
|-------------------------|---------------------------------|-----------------------------|--------------------------|--------|------------|---------|-----------|---------|------------|-------------------------|
|                         |                                 |                             | Eligible                 |        | Ineligible |         | Unchanged |         |            |                         |
|                         |                                 |                             | N                        | (%)    | N          | (%)     | N         | (%)     |            |                         |
| Cases                   | 0.271                           | 10.43                       | 92                       | (2.50) | 481        | (13.10) | 3100      | (84.40) | 3673       | (-10.59)                |
| Gleason score <7        | 0.346                           | 7.65                        | 45                       | (2.21) | 319        | (15.67) | 1672      | (82.12) | 2036       | (-13.46)                |
| Gleason score ≥7        | 0.115                           | 14.37                       | 38                       | (2.77) | 130        | (9.48)  | 1204      | (87.76) | 1372       | (-6.71)                 |
| Gleason score missing   | 0.238                           | 11.35                       | 9                        | (3.40) | 32         | (12.08) | 224       | (84.53) | 265        | (-8.68)                 |
| Age at biopsy <65 years | 0.362                           | 8.07                        | 13                       | (1.07) | 187        | (15.33) | 1020      | (83.61) | 1220       | (-14.26)                |
| Controls                | 0.461                           | 7.19                        | 41                       | (1.74) | 463        | (19.59) | 1859      | (78.67) | 2363       | (17.86)                 |
| Age at biopsy <65 years | 0.531                           | 6.32                        | 7                        | (0.74) | 196        | (20.83) | 738       | (78.43) | 941        | (20.09)                 |
| Controls without biopsy | -0.042                          | 1.54                        | -                        | -      | -          | -       | -         | -       | -          | -                       |

<sup>1</sup> Mean values of the standardized PGS<sub>PSA</sub> were calculated in each subset of participants. PGSPSA was transformed to a z-score with mean equal to 0 and standard deviation equal to 1 based on the full GERA cohort. Therefore, a value of ~0.5 is equivalent to a PGS value approximately half SD above the mean

<sup>2</sup> For each participant who underwent a biopsy PSA values closest to the time of biopsy were selected. For controls who did not have a biopsy we first summarized all available PSA values for each participant by taking the median and then calculated the mean PSA value across participants

<sup>3</sup> Net re-classification index (NRI) was calculated separately for cases as: NRI = eligible(%) – ineligible(%) and controls as NRI = ineligible(%) – eligible(%)

**Supplementary Table 16:** Comparison of nested logistic regression models for risk of prostate cancer (323 cases and 5415 controls) in participants of predominantly European ancestry from the Prostate Cancer Prevention Trial (PCPT). Models are indexed to facilitate comparisons of AUC estimates. For each model the odds ratios are only reported for the PSA and polygenic score (PGS) variables of interest.

| Model <sup>1</sup>                                                                       | Predictor                                                   | Association Estimates |                                |                                                  |        |                   |                                                                                        |
|------------------------------------------------------------------------------------------|-------------------------------------------------------------|-----------------------|--------------------------------|--------------------------------------------------|--------|-------------------|----------------------------------------------------------------------------------------|
|                                                                                          |                                                             | OR <sup>2</sup>       | (95% CI)                       | P                                                | AUC    | (95% CI)          | P <sub>AUC</sub> <sup>3</sup>                                                          |
| 0 Baseline age + RCT arm                                                                 | -                                                           | -                     | -                              | -                                                | 0.5893 | (0.5574 – 0.6212) | -                                                                                      |
| 1 Baseline age + RCT arm + baseline PSA                                                  | log(PSA)                                                    | 1.88                  | (1.55 – 2.29)                  | 1.82×10 <sup>-10</sup>                           | 0.6388 | (0.6091 – 0.6686) | -                                                                                      |
| 2 Baseline age + RCT arm + baseline PSA <sup>G</sup>                                     | log(PSA <sup>G</sup> )                                      | 1.93                  | (1.59 – 2.34)                  | 3.58×10 <sup>-11</sup>                           | 0.6503 | (0.6211 – 0.6795) | vs M <sub>1</sub> = 0.14                                                               |
| 3 Baseline age + RCT arm + PGS <sub>PSA</sub>                                            | PGS <sub>PSA</sub>                                          | 0.98                  | (0.88 – 1.09)                  | 0.71                                             | 0.6055 | (0.5743 – 0.6367) | -                                                                                      |
| 4 Baseline age + RCT arm + PGS <sub>269</sub>                                            | PGS <sub>269</sub>                                          | 1.53                  | (1.36 – 1.72)                  | 4.59×10 <sup>-13</sup>                           | 0.6550 | (0.6251 – 0.6848) | -                                                                                      |
| 5 Baseline age + RCT arm + PGS <sub>269</sub> <sup>adj</sup>                             | PGS <sub>269</sub> <sup>adj</sup>                           | 1.57                  | (1.40 – 1.76)                  | 1.92×10 <sup>-14</sup>                           | 0.6584 | (0.6282 – 0.6885) | vs M <sub>4</sub> = 0.49                                                               |
| 6 Baseline age + RCT arm + PGS <sub>269</sub> + baseline PSA                             | PGS <sub>269</sub><br>log(PSA)                              | 1.48<br>1.77          | (1.32 – 1.66)<br>(1.45 – 2.15) | 4.22×10 <sup>-11</sup><br>1.56×10 <sup>-8</sup>  | 0.6817 | (0.6531 – 0.7104) | vs M <sub>2</sub> = 6.42×10 <sup>-3</sup><br>vs M <sub>4</sub> = 1.93×10 <sup>-3</sup> |
| 7 Baseline age + RCT arm + PGS <sub>269</sub> + baseline PSA <sup>G</sup>                | PGS <sub>269</sub><br>log(PSA <sup>G</sup> )                | 1.54<br>1.97          | (1.37 – 1.73)<br>(1.61 – 2.40) | 2.55×10 <sup>-13</sup><br>2.03×10 <sup>-11</sup> | 0.6904 | (0.6621 – 0.7187) | vs M <sub>4</sub> = 2.63×10 <sup>-4</sup><br>vs M <sub>6</sub> = 0.032                 |
| 8 Baseline age + RCT arm + PGS <sub>269</sub> <sup>adj</sup> + baseline PSA <sup>G</sup> | PGS <sub>269</sub> <sup>adj</sup><br>log(PSA <sup>G</sup> ) | 1.55<br>1.88          | (1.38 – 1.74)<br>(1.55 – 2.29) | 1.38×10 <sup>-13</sup><br>2.23×10 <sup>-10</sup> | 0.6887 | (0.6602 – 0.7172) | vs M <sub>5</sub> = 7.37×10 <sup>-4</sup><br>vs M <sub>7</sub> = 0.66                  |

<sup>1</sup> Models with genetic predictors (PSA<sup>G</sup>, PGS<sub>269</sub>, PGS<sub>269</sub><sup>adj</sup>, and PGS<sub>PSA</sub>) were additionally adjusted for the top 10 genetic ancestry principal components

<sup>2</sup> PGS<sub>269</sub> and PGS<sub>PSA</sub> were standardized to have a mean of 0 and a standard deviation (SD) of 1, with odds ratios estimated per SD increase in each score

<sup>3</sup> P-values based on De Long's test for two correlated ROC curves

**Supplementary Table 17:** Comparison of nested logistic regression models for risk of aggressive prostate cancer (71 cases and 5415 controls) in participants of predominantly European ancestry from the Prostate Cancer Prevention Trial (PCPT). Models are indexed to facilitate comparisons of AUC estimates. For each model the odds ratios are only reported for the PSA and polygenic score (PGS) variables of interest.

| Model <sup>1</sup>                                                                       | Predictor                                                   | Association Estimates |                                |                                                |        |                   |                                                                        |
|------------------------------------------------------------------------------------------|-------------------------------------------------------------|-----------------------|--------------------------------|------------------------------------------------|--------|-------------------|------------------------------------------------------------------------|
|                                                                                          |                                                             | OR <sup>2</sup>       | (95% CI)                       | P                                              | AUC    | (95% CI)          | P <sub>AUC</sub> <sup>3</sup>                                          |
| 0 Baseline age + RCT arm                                                                 | -                                                           | -                     | -                              | -                                              | 0.5805 | (0.5154 – 0.6457) | -                                                                      |
| 1 Baseline age + RCT arm + baseline PSA                                                  | log(PSA)                                                    | 2.80                  | (1.81 – 4.31)                  | 3.17×10 <sup>-6</sup>                          | 0.6840 | (0.6232 – 0.7449) | -                                                                      |
| 2 Baseline age + RCT arm + baseline PSA <sup>G</sup>                                     | log(PSA <sup>G</sup> )                                      | 3.04                  | (1.98 – 4.65)                  | 3.34×10 <sup>-7</sup>                          | 0.7161 | (0.6589 – 0.7733) | vs M <sub>1</sub> = 0.040                                              |
| 3 Baseline age + RCT arm + PGS <sub>PSA</sub>                                            | PGS <sub>PSA</sub>                                          | 0.92                  | (0.73 – 1.15)                  | 0.46                                           | 0.6149 | (0.5575 – 0.6723) | -                                                                      |
| 4 Baseline age + RCT arm + PGS <sub>269</sub>                                            | PGS <sub>269</sub>                                          | 1.45                  | (1.14 – 1.83)                  | 2.21×10 <sup>-3</sup>                          | 0.6453 | (0.5819 – 0.7087) | -                                                                      |
| 5 Baseline age + RCT arm + PGS <sub>269</sub> <sup>adj</sup>                             | PGS <sub>269</sub> <sup>adj</sup>                           | 1.54                  | (1.22 – 1.96)                  | 2.95×10 <sup>-4</sup>                          | 0.6572 | (0.5941 – 0.7203) | vs M <sub>4</sub> = 0.22                                               |
| 6 Baseline age + RCT arm + PGS <sub>269</sub> + baseline PSA                             | PGS <sub>269</sub><br>log(PSA)                              | 1.36<br>2.66          | (1.08 – 1.73)<br>(1.72 – 4.13) | 0.010<br>1.14×10 <sup>-5</sup>                 | 0.7093 | (0.6471 – 0.7715) | vs M <sub>2</sub> = 0.14<br>vs M <sub>4</sub> = 6.27×10 <sup>-3</sup>  |
| 7 Baseline age + RCT arm + PGS <sub>269</sub> + baseline PSA <sup>G</sup>                | PGS <sub>269</sub><br>log(PSA <sup>G</sup> )                | 1.46<br>3.12          | (1.15 – 1.85)<br>(2.02 – 4.80) | 1.65×10 <sup>-3</sup><br>2.72×10 <sup>-7</sup> | 0.7316 | (0.6715 – 0.7918) | vs M <sub>4</sub> = 3.40×10 <sup>-4</sup><br>vs M <sub>6</sub> = 0.041 |
| 8 Baseline age + RCT arm + PGS <sub>269</sub> <sup>adj</sup> + baseline PSA <sup>G</sup> | PGS <sub>269</sub> <sup>adj</sup><br>log(PSA <sup>G</sup> ) | 1.51<br>2.98          | (1.19 – 1.91)<br>(1.94 – 4.57) | 6.06×10 <sup>-4</sup><br>6.03×10 <sup>-7</sup> | 0.7338 | (0.6737 – 0.7938) | vs M <sub>5</sub> = 4.99×10 <sup>-4</sup><br>vs M <sub>7</sub> = 0.69  |

<sup>1</sup> Models with genetic predictors (PSA<sup>G</sup>, PGS<sub>269</sub>, PGS<sub>269</sub><sup>adj</sup>, and PGS<sub>PSA</sub>) were additionally adjusted for the top 10 genetic ancestry principal components

<sup>2</sup> PGS<sub>269</sub> and PGS<sub>PSA</sub> were standardized to have a mean of 0 and a standard deviation (SD) of 1, with odds ratios estimated per SD increase in each score

<sup>3</sup> P-values based on De Long's test for two correlated ROC curves

**Supplementary Table 18:** Association estimates from case-only nested logistic regression models comparing risk of aggressive prostate cancer (n=71) to non-aggressive disease (n=252) in participants of predominantly European ancestry from the Prostate Cancer Prevention Trial (PCPT). Models are indexed to facilitate comparisons of AUC estimates. For each model the odds ratios are only reported for the PSA and polygenic score (PGS) variables of interest.

| Model <sup>1</sup> | Predictor                                                                              | Association Estimates                                       |              |                                |                               |                   |                               |                                                      |
|--------------------|----------------------------------------------------------------------------------------|-------------------------------------------------------------|--------------|--------------------------------|-------------------------------|-------------------|-------------------------------|------------------------------------------------------|
|                    |                                                                                        | OR <sup>2</sup>                                             | (95% CI)     | P                              | AUC                           | (95% CI)          | P <sub>AUC</sub> <sup>3</sup> |                                                      |
| 0                  | Baseline age + RCT arm                                                                 | -                                                           | -            | -                              | 0.5142                        | (0.4380 – 0.5904) | -                             |                                                      |
| 1                  | Baseline age + RCT arm + baseline PSA                                                  | log(PSA)                                                    | 1.81         | (1.07 – 3.05)                  | 0.026                         | 0.5924            | (0.5156 – 0.6692)             | -                                                    |
| 2                  | Baseline age + RCT arm + baseline PSA <sup>G</sup>                                     | log(PSA <sup>G</sup> )                                      | 2.06         | (1.21 – 3.48)                  | 7.35×10 <sup>-3</sup>         | 0.6293            | (0.5556 – 0.7029)             | vs M <sub>1</sub> = 0.22                             |
| 3                  | Baseline age + RCT arm + PGS <sub>PSA</sub>                                            | PGS <sub>PSA</sub>                                          | 0.88         | (0.67 – 1.17)                  | 0.38                          | 0.5824            | (0.5048 – 0.6601)             | -                                                    |
| 4                  | Baseline age + RCT arm + PGS <sub>269</sub>                                            | PGS <sub>269</sub>                                          | 0.90         | (0.67 – 1.21)                  | 0.50                          | 0.5787            | (0.5016 – 0.6558)             | -                                                    |
| 5                  | Baseline age + RCT arm + PGS <sub>269</sub> <sup>adj</sup>                             | PGS <sub>269</sub> <sup>adj</sup>                           | 0.97         | (0.73 – 1.29)                  | 0.84                          | 0.5740            | (0.4954 – 0.6526)             | vs M <sub>4</sub> = 0.63                             |
| 6                  | Baseline age + RCT arm + PGS <sub>269</sub> + baseline PSA                             | PGS <sub>269</sub><br>log(PSA)                              | 0.87<br>1.87 | (0.65 – 1.18)<br>(1.10 – 3.17) | 0.38<br>0.020                 | 0.6159            | (0.5397 – 0.6920)             | vs M <sub>2</sub> = 0.13<br>vs M <sub>4</sub> = 0.29 |
| 7                  | Baseline age + RCT arm + PGS <sub>269</sub> + baseline PSA <sup>G</sup>                | PGS <sub>269</sub><br>log(PSA <sup>G</sup> )                | 0.92<br>2.04 | (0.68 – 1.24)<br>(1.20 – 3.45) | 0.58<br>7.92×10 <sup>-3</sup> | 0.6282            | (0.5561 – 0.7002)             | vs M <sub>4</sub> = 0.17<br>vs M <sub>5</sub> = 0.48 |
| 8                  | Baseline age + RCT arm + PGS <sub>269</sub> <sup>adj</sup> + baseline PSA <sup>G</sup> | PGS <sub>269</sub> <sup>adj</sup><br>log(PSA <sup>G</sup> ) | 0.95<br>2.06 | (0.71 – 1.27)<br>(1.22 – 3.49) | 0.74<br>7.08×10 <sup>-3</sup> | 0.6282            | (0.5551 – 0.7012)             | vs M <sub>5</sub> = 0.13<br>vs M <sub>7</sub> = 1    |

<sup>1</sup> Models with genetic predictors (PSA<sup>G</sup>, PGS<sub>269</sub>, PGS<sub>269</sub><sup>adj</sup>, and PGS<sub>PSA</sub>) were additionally adjusted for the top 10 genetic ancestry principal components

<sup>2</sup> PGS<sub>269</sub> and PGS<sub>PSA</sub> were standardized to have a mean of 0 and a standard deviation (SD) of 1, with odds ratios estimated per SD increase in each score

<sup>3</sup> P-values based on De Long's test for two correlated ROC curves

**Supplementary Table 19:** Comparison of nested logistic regression models for risk of aggressive prostate cancer (85 cases and 21,795 controls) in participants of predominantly European ancestry from the Selenium and Vitamin E Cancer Prevention Trial (SELECT). Models are indexed to facilitate comparisons of AUC estimates. For each model the odds ratios are only reported for the PSA and polygenic score (PGS) variables of interest.

| Model <sup>1</sup> | Predictor                                                                              | Association Estimates                                       |              |                                |                                                 |                   |                               |                                                                       |
|--------------------|----------------------------------------------------------------------------------------|-------------------------------------------------------------|--------------|--------------------------------|-------------------------------------------------|-------------------|-------------------------------|-----------------------------------------------------------------------|
|                    |                                                                                        | OR <sup>2</sup>                                             | (95% CI)     | P                              | AUC                                             | (95% CI)          | P <sub>AUC</sub> <sup>3</sup> |                                                                       |
| 0                  | Baseline age + RCT arm                                                                 | -                                                           | -            | -                              | 0.6042                                          | (0.5439 – 0.6644) | -                             |                                                                       |
| 1                  | Baseline age + RCT arm + baseline PSA                                                  | log(PSA)                                                    | 3.40         | (2.34 – 4.93)                  | 1.10×10 <sup>-10</sup>                          | 0.7415            | (0.6933 – 0.7897)             | -                                                                     |
| 2                  | Baseline age + RCT arm + baseline PSA <sup>G</sup>                                     | log(PSA <sup>G</sup> )                                      | 3.38         | (2.35 – 4.83)                  | 3.35×10 <sup>-11</sup>                          | 0.7751            | (0.7292 – 0.8210)             | vs M <sub>1</sub> = 0.044                                             |
| 3                  | Baseline age + RCT arm + PGS <sub>PSA</sub>                                            | PGS <sub>PSA</sub>                                          | 1.05         | (0.85 – 1.31)                  | 0.63                                            | 0.6771            | (0.6196 – 0.7347)             | -                                                                     |
| 4                  | Baseline age + RCT arm + PGS <sub>269</sub>                                            | PGS <sub>269</sub>                                          | 1.81         | (1.43 – 2.28)                  | 7.43×10 <sup>-7</sup>                           | 0.7264            | (0.6709 – 0.7818)             | -                                                                     |
| 5                  | Baseline age + RCT arm + PGS <sub>269</sub> <sup>adj</sup>                             | PGS <sub>269</sub> <sup>adj</sup>                           | 1.81         | (1.45 – 2.25)                  | 1.29×10 <sup>-7</sup>                           | 0.7301            | (0.6753 – 0.7849)             | vs M <sub>4</sub> = 0.58                                              |
| 6                  | Baseline age + RCT arm + PGS <sub>269</sub> + baseline PSA                             | PGS <sub>269</sub><br>log(PSA)                              | 1.61<br>3.20 | (1.28 – 2.02)<br>(2.19 – 4.67) | 3.71×10 <sup>-5</sup><br>1.54×10 <sup>-9</sup>  | 0.7956            | (0.7501 – 0.8410)             | vs M <sub>2</sub> = 0.13<br>vs M <sub>4</sub> = 3.39×10 <sup>-4</sup> |
| 7                  | Baseline age + RCT arm + PGS <sub>269</sub> + baseline PSA <sup>G</sup>                | PGS <sub>269</sub><br>log(PSA <sup>G</sup> )                | 1.74<br>3.43 | (1.39 – 2.18)<br>(2.37 – 4.95) | 1.11×10 <sup>-6</sup><br>5.25×10 <sup>-11</sup> | 0.8029            | (0.7572 – 0.8487)             | vs M <sub>4</sub> = 1.13×10 <sup>-4</sup><br>vs M <sub>5</sub> = 0.23 |
| 8                  | Baseline age + RCT arm + PGS <sub>269</sub> <sup>adj</sup> + baseline PSA <sup>G</sup> | PGS <sub>269</sub> <sup>adj</sup><br>log(PSA <sup>G</sup> ) | 1.74<br>3.26 | (1.40 – 2.16)<br>(2.27 – 4.68) | 7.08×10 <sup>-7</sup><br>1.35×10 <sup>-10</sup> | 0.8031            | (0.7577 – 0.8484)             | vs M <sub>5</sub> = 8.27×10 <sup>-5</sup><br>vs M <sub>7</sub> = 0.97 |

<sup>1</sup> Models with genetic predictors (PSA<sup>G</sup>, PGS<sub>269</sub>, PGS<sub>269</sub><sup>adj</sup>, and PGS<sub>PSA</sub>) were additionally adjusted for the top 10 genetic ancestry principal components

<sup>2</sup> PGS<sub>269</sub> and PGS<sub>PSA</sub> were standardized to have a mean of 0 and a standard deviation (SD) of 1, with odds ratios estimated per SD increase in each score

<sup>3</sup> P-values based on De Long's test for two correlated ROC curves

**Supplementary Table 20:** PSA Field codes used to extra PSA values from linked GP records in the UK Biobank cohort

| <b>HES Field code</b> | <b>Description</b>                              |
|-----------------------|-------------------------------------------------|
| X80QD                 | Prostate specific antigen                       |
| XE25C                 | Prostate-specific antigen level                 |
| XabAM                 | Serum prostate specific antigen level           |
| XaPqN                 | Total prostate specific antigen level           |
| XaQ9n                 | Ultra-sensitive prostate specific antigen level |



**Supplementary Table 21: Study-specific GWAS analytic approach and adjustment covariates**

| Study | GWAS Phenotype    | Analysis           | Covariates                                                                                                                                                                                                                                                                                                                                                                                                |
|-------|-------------------|--------------------|-----------------------------------------------------------------------------------------------------------------------------------------------------------------------------------------------------------------------------------------------------------------------------------------------------------------------------------------------------------------------------------------------------------|
| UKB   | Median log(PSA)   | Linear regression  | Age at PSA measurement, baseline BMI, baseline smoking status (never, current, former smokers), diagnosed with benign prostatic hyperplasia (BPH) or prostatitis (1=ever, 0=never), time between median PSA and BPH or prostatitis diagnosis (coded as 0 for those without a corresponding diagnosis), finasteride use (1=ever, 0=never), genotyping array (UK BiLEVE vs. UKB Affymetrix Axiom), PC1-PC15 |
|       | Random Intercept  | Linear mixed model | Age at each observation, baseline BMI, baseline smoking status (never, current, former smokers), diagnosed with benign prostatic hyperplasia (BPH) or prostatitis (1=ever, 0=never), finasteride use (1=ever, 0=never), genotyping array (UK BiLEVE vs. UKB Affymetrix Axiom), PC1-PC15                                                                                                                   |
| GERA  | Random Intercept  | Linear mixed model | Age at each observation, composite variable for DNA collection kit and genotyping array (chip-kit), PC1-PC10                                                                                                                                                                                                                                                                                              |
| PLCO  | Baseline log(PSA) | Linear mixed model | Age at PSA measurement, baseline BMI, baseline smoking status (never, current, former smokers), benign prostatic hyperplasia (surgically-treated BPH, BPH without surgery, none) and ancestry-specific PC1-PC10. Residuals and models were created and run separately by ancestry, genotype array, and imputation batch.                                                                                  |
| BioVU | Median log(PSA)   | Linear regression  | Median age of PSA measurements, median BMI, diagnosed with BPH (1=ever, 0=never), testosterone use (1=ever, 0=never), finasteride use (1=ever, 0=never), PC1-PC10                                                                                                                                                                                                                                         |
| MDCS  | Baseline log(PSA) | Linear regression  | Age at blood draw for PSA measurement, genotyping batch, PC1-PC10                                                                                                                                                                                                                                                                                                                                         |
